# Supplementary material for: Spectroscopic and electrochemical characterization of a Pr4+ imidophosphorane complex and the redox chemistry of Nd3+ and Dy3+ complexes
Source: Royal Society of Chemistry journal article supplement (doi:10.1039/d2dt00758d), 2022-01-01
Supplement: d2dt00758d1.pdf [file d2dt00758d1.pdf]

## Spectroscopic and Electrochemical Characterization of a Pr<sup>4+</sup> Imidophosphorane Complex and the Redox Chemistry of Nd<sup>3+</sup> and Dy<sup>3+</sup> Complexes

Natalie T. Rice<sup>†‡</sup>, Ivan A. Popov<sup>§##</sup>, Rebecca K. Carlson<sup>§</sup>, Samuel M. Greer<sup>||</sup>, Andrew C. Boggiano<sup>†</sup>, Benjamin W. Stein<sup>||</sup>, John Bacsa<sup>†</sup>, Enrique R. Batista<sup>‡\*</sup>, Ping Yang<sup>‡\*</sup>, Henry S. La Pierre<sup>†φ\*</sup>

<sup>†</sup> School of Chemistry and Biochemistry, Georgia Institute of Technology, Atlanta, Georgia 30332-0400, United States.

<sup>§</sup> Theoretical Division, Los Alamos National Laboratory, Los Alamos, New Mexico 87545, United States.

<sup>#</sup> Department of Chemistry, The University of Akron, Akron, OH 44325-3601, United States.

<sup>||</sup> Chemistry Division, Los Alamos National Laboratory, Los Alamos, New Mexico 87545, United States.

<sup>φ</sup> Nuclear and Radiological Engineering and Medical Physics Program, School of Mechanical Engineering, Georgia Institute of Technology, Atlanta, Georgia 30332-0400, United States.

### Table of Contents

|                                                 |           |
|-------------------------------------------------|-----------|
| <b>General Considerations</b> .....             | <b>2</b>  |
| <b>Synthetic Methods</b> .....                  | <b>2</b>  |
| <b>NMR Spectroscopy</b> .....                   | <b>4</b>  |
| <b>Crystallographic Analyses</b> .....          | <b>14</b> |
| <b>Electrochemistry</b> .....                   | <b>38</b> |
| <b>EPR Spectroscopy</b> .....                   | <b>44</b> |
| <b>Electronic Absorption Spectroscopy</b> ..... | <b>46</b> |
| <b>Density Functional Theory</b> .....          | <b>50</b> |

## General Considerations

Unless otherwise noted, all reagents were obtained from commercial suppliers and the syntheses and manipulations were conducted under argon with exclusion of oxygen and water using Schlenk techniques or in an inert atmosphere box (Vigor) under a dinitrogen (<0.1 ppm O<sub>2</sub>/H<sub>2</sub>O) atmosphere. The glovebox is equipped with two -35 °C freezers. All glassware and cannulae were stored in an oven overnight (>8 h) at a temperature of ca. 160 °C. Celite and molecular sieves were dried under vacuum at a temperature >250 °C for a minimum of 24 h. C<sub>6</sub>D<sub>6</sub> was stored over 3 Å molecular sieves and then vacuum-transferred from purple sodium/benzophenone prior to use. Diethyl ether, *n*-pentane, *n*-hexane, benzene, toluene, tetrahydrofuran, and 1,2-dimethoxyethane were purged with UHP-grade argon (Airgas) and passed through columns containing Q-5 and molecular sieves in a solvent purification system (JC Meyer Solvent Systems). All solvents in the glovebox were stored in bottles over 3 Å molecular sieves. Methanol was dried by refluxing over magnesium turnings activated with iodine for 12 h and then distilled and stored over 3 Å molecular sieves.

The starting materials PrI<sub>3</sub>(THF)<sub>4</sub>, NdI<sub>3</sub>(THF)<sub>3.5</sub>, DyI<sub>3</sub>(THF)<sub>3.5</sub><sup>1</sup>, [(CH<sub>2</sub>N<sup>t</sup>Bu)<sub>2</sub>(Et<sub>2</sub>N)P=NK]<sup>2</sup>, and potassium benzyl<sup>3</sup> were prepared according to literature procedures. Potassium *t*-butoxide was sublimed prior to use. Electrolyte, [NBu<sub>4</sub>][PF<sub>6</sub>] was recrystallized from ethanol and solvent evacuated for 18 h prior to use. NMR spectra were obtained on a Bruker Avance III 400 MHz spectrometer at 298 K, unless otherwise noted. <sup>1</sup>H, <sup>13</sup>C, and <sup>31</sup>P NMR chemical shifts are reported in δ, parts per million. <sup>1</sup>H NMR are referenced to the residual <sup>1</sup>H resonances of the solvent. <sup>13</sup>C NMR are referenced to the <sup>13</sup>C resonance of the deuterated solvent.<sup>4</sup> Peak position is listed, followed by peak multiplicity, integration value, and proton assignment, where applicable. Multiplicity and shape are indicated by the following abbreviations: s (singlet); d (doublet); t (triplet); q (quartet); dd (doublet of doublets); td (triplet of doublets); m (multiplet); br (broad). Infrared (IR) samples were taken on a Bruker ALPHA FTIR spectrometer from 400 to 4000 cm<sup>-1</sup>. IR samples were prepared as Nujol mulls sandwiched between two KBr plates. The peaks are listed in wavenumber [cm<sup>-1</sup>] and intensity using the following abbreviations: vw (very weak); w (weak); m (medium); s (strong); vs (very strong); br (broad). UV/visible/NIR spectroscopy was performed in Teflon-valve sealed quartz cuvettes with a 1 cm path length on a Hitachi UH4150 UV-vis-NIR scanning spectrophotometer between 2400-200 nm. Elemental analyses were determined at Berkeley Microanalytical Facility (University of California Berkeley).

## Synthetic Methods

### Preparation of [K][Pr(NP\*)<sub>4</sub>], (1-Pr(NP\*)).

Inside a glovebox, PrI<sub>3</sub>(THF)<sub>4</sub> (0.372 g, 0.459 mmol) was added to a 20 mL scintillation vial charged with a Teflon stir bar and 1 mL diethyl ether. [(CH<sub>2</sub>N<sup>t</sup>Bu)<sub>2</sub>(Et<sub>2</sub>N)P=NK] (0.600 g, 1.84 mmol) was added as a solution in diethyl ether (6 mL) and the reaction mixture was stirred overnight. Then the mixture was filtered through a fine porosity frit packed with Celite. The filtrate was concentrated *in vacuo* to give a colorless solid. The residue was triturated three times with 1 mL *n*-pentane and then taken up in 10 mL hexanes and filtered through a pipet filter packed with Celite and glass fiber filter paper. The pale yellow

solution was concentrated *in vacuo* and placed into a -35° C freezer. Overnight pale green crystals formed which were isolated by decantation and residual volatiles were removed *in vacuo* to afford the title compound (48%, 0.293 g). <sup>1</sup>H NMR (400.13 MHz, C<sub>6</sub>D<sub>6</sub>): 5.54 (s, 8 H), 4.76 (s, 8 H), 2.50 (s, 72 H), -3.35 (s, 24 H), -5.88 (s, 16 H). <sup>31</sup>P NMR (161.98 MHz, C<sub>6</sub>D<sub>6</sub>): 343.87 (s). <sup>13</sup>C NMR (100.61 MHz, C<sub>6</sub>D<sub>6</sub>): 54.21 (s), 44.51 (s), 28.38 (s), 8.94 (s). Quaternary carbon not observed. IR:  $\nu$  [cm<sup>-1</sup>] = 1356(m), 1266 (m), 1249 (m), 1210 (s), 1196 (s), 1161 (s), 1095 (w), 1074 (m), 1054 (m), 1027 (m), 974 (m), 926 (m), 869 (m), 795 (m), 690 (m), 624 (w). Elemental analysis found(calculated): C, 50.87(50.59), H, 9.63(9.70), N, 16.82(16.85). XRD quality crystals were grown from *n*-hexane at -35 °C.

***In situ* preparation of [Pr(NP\*)<sub>4</sub>], (2-Pr(NP\*)) for EPR (toluene), UV-vis-NIR (toluene and THF), and <sup>31</sup>P NMR (d<sub>8</sub>-toluene).**

Inside a glovebox, 1-Pr(NP\*) (0.05 g, 0.04 mmol) was suspended in 2 mL solvent in a 20 mL scintillation vial. This suspension was chilled to -35 °C in a glovebox freezer. Excess AgI (4 eq.) was added to the scintillation vial as solid and the vial replaced in the freezer. The reaction mixture was kept in the freezer for 1 h for toluene and for 40 min. for THF with occasional manual agitation. Over this period, the color of the solution went from pale green to dark blue. The solution was filtered cold through a pipet filter packed with Celite and a glass fiber filter paper into a cold well (at 77 K). A fine grey powder was observed on the pipet filter.

**Preparation of [K][Nd(NP\*)<sub>4</sub>], (1-Nd(NP\*)).**

Inside a glovebox, NdI<sub>3</sub>(THF)<sub>3.5</sub> (0.179 g, 0.230 mmol) was added to a 20 mL scintillation vial charged with a glass stir bar and 1 mL diethyl ether. [(CH<sub>2</sub>N<sup>t</sup>Bu)<sub>2</sub>(Et<sub>2</sub>N)P=NK] (0.300 g, 0.919 mmol) was added as a solution in diethyl ether (6 mL) and the reaction mixture was stirred overnight in the dark. Then the mixture was filtered through a fine porosity frit packed with Celite. The filtrate was concentrated *in vacuo* to give a blue solid. The residue was triturated three times with 1 mL *n*-pentane and then taken up in 12 mL hexanes and filtered through a pipet filter packed with Celite and glass fiber filter paper. The pale blue solution was concentrated *in vacuo* and placed into a -35° C freezer. Overnight pale green crystals formed which were isolated by decantation and residual volatiles were removed *in vacuo* to afford the title compound (46 %, 0.143 g). <sup>1</sup>H NMR (400.13 MHz, C<sub>6</sub>D<sub>6</sub>): 4.80 (s, 8 H), 4.62 (s, 8 H), 2.09 (s, 72 H), -1.55 (s, 24 H), -2.06 (s, br, 16H). <sup>31</sup>P NMR (161.98 MHz, C<sub>6</sub>D<sub>6</sub>): 525.93 (s). <sup>13</sup>C NMR (100.61 MHz, C<sub>6</sub>D<sub>6</sub>): 53.28 (s), 43.95 (s), 30.56 (s), 27.09 (s), 11.00 (s). IR:  $\nu$  [cm<sup>-1</sup>] = 1356 (m), 1266 (m), 1249 (m), 1210 (s), 1196 (s), 1164 (s), 1095 (w), 1054 (m), 1027 (m), 974 (m), 926 (m), 869 (m), 795 (m), 692 (m), 626 (w). Elemental analysis found(calculated) with ½ hexane molecule as identified by <sup>1</sup>H NMR. Amount of hexanes identified is dependent on absolute vacuum: C, 51.65(51.50), H, 10.19(9.89), N, 16.38(16.29). XRD quality crystals were grown from diethyl ether at -35 °C.

**Preparation of [K][Dy(NP\*)<sub>4</sub>], (1-Dy(NP\*)).**

Inside a glovebox, DyI<sub>3</sub>(THF)<sub>3.5</sub> (0.201 g, 0.252 mmol) was added to a 20 mL scintillation vial charged with a Teflon stir bar and 1 mL diethyl ether. [(CH<sub>2</sub>N<sup>t</sup>Bu)<sub>2</sub>(Et<sub>2</sub>N)P=NK] (0.330 g, 1.01 mmol) was added as a solution in diethyl ether (6 mL) and the reaction mixture was stirred overnight. Then the mixture was filtered through a fine porosity frit packed

with Celite. The filtrate was concentrated *in vacuo* to give a colorless solid. The residue was triturated three times with 1 mL *n*-pentane and then taken up in 5 mL *n*-pentane and filtered through a pipet filter packed with Celite and glass fiber filter paper. The pale yellow solution was concentrated *in vacuo* and placed into a -35° C freezer. Over 2-3 days, crystals formed which were isolated by decantation and residual volatiles were removed *in vacuo* to afford the title compound (33%, 0.1141 g). <sup>1</sup>H NMR (400.13 MHz, C<sub>6</sub>D<sub>6</sub>): 27.24 (b), 11.24 (b), 8.02 (s). <sup>31</sup>P NMR (161.98 MHz, C<sub>6</sub>D<sub>6</sub>): 2335.74 (s). <sup>13</sup>C NMR (100.61 MHz, C<sub>6</sub>D<sub>6</sub>): No resonances were observed. IR:  $\nu$  [cm<sup>-1</sup>] = 1356(m), 1266 (m), 1251 (m), 1210 (s), 1196 (s), 1171 (s), 1151 (s), 1112 (w), 1095 (w), 1054 (m), 1029 (m), 976 (m), 926 (m), 869 (m), 797 (m), 692 (m), 626 (w). Elemental analysis found(calculated): C, 49.98(49.78), H, 9.45(9.55), N, 16.40(16.59). XRD quality crystals were grown from diethyl ether at -35 °C.

## NMR Spectroscopy

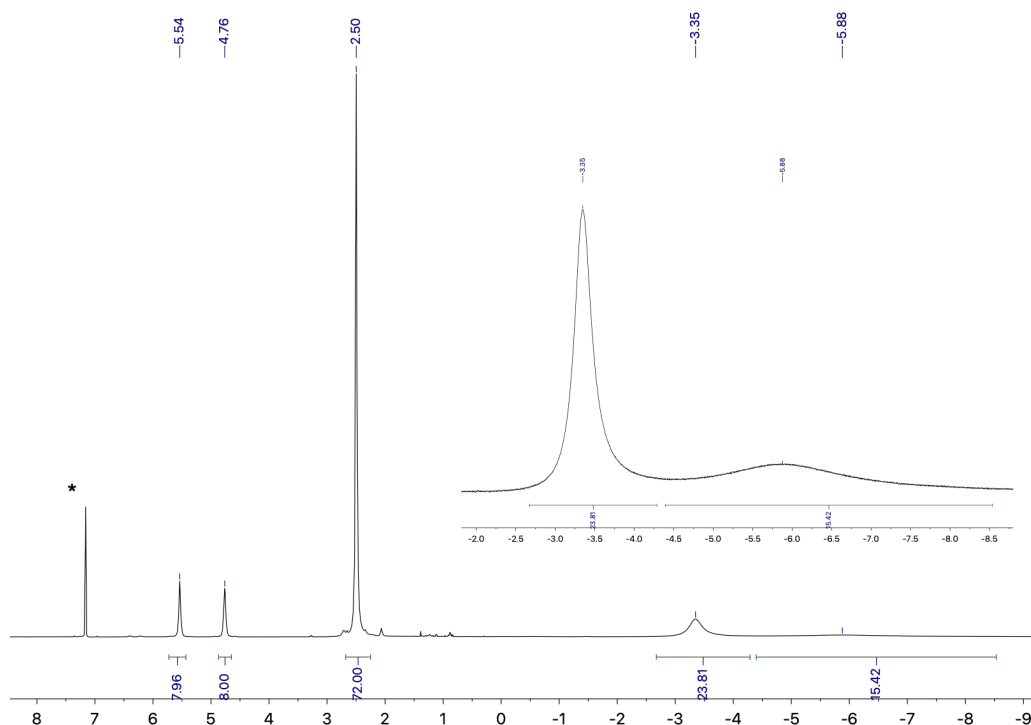

**Figure S1.** <sup>1</sup>H NMR of **1-Pr(NP\*)** in C<sub>6</sub>D<sub>6</sub>. Peak of C<sub>6</sub>D<sub>5</sub>H is noted as \*.

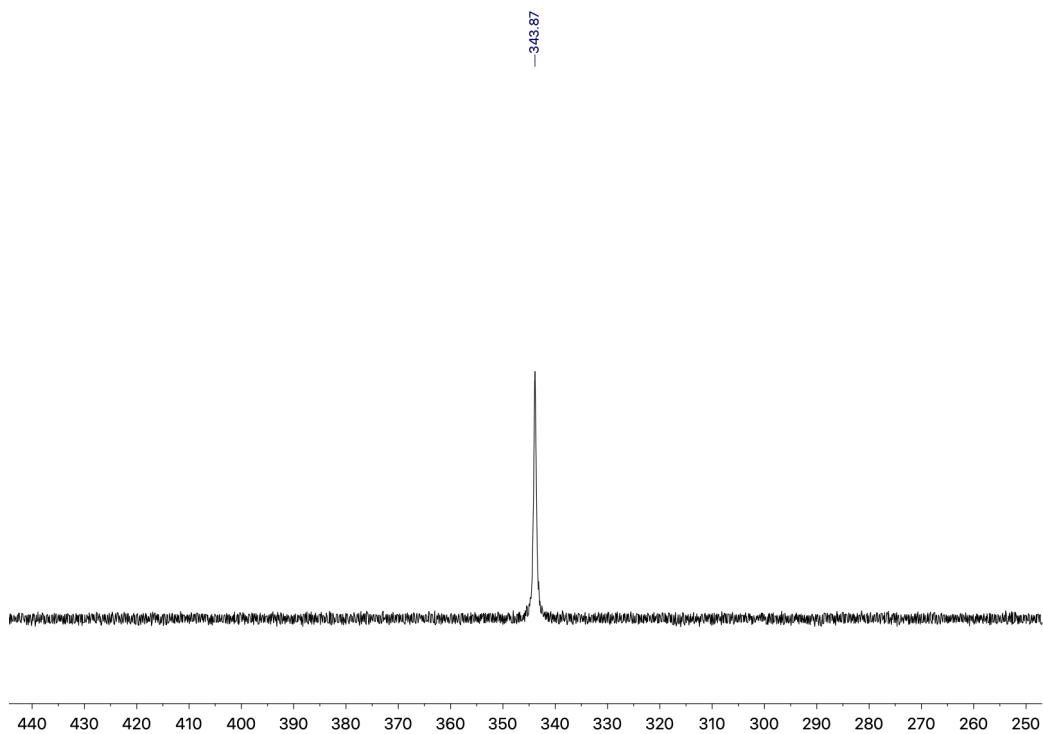

**Figure S2.**  $^{31}\text{P}\{^1\text{H}\}$  NMR of **1-Pr(NP\*)** in  $\text{C}_6\text{D}_6$ .

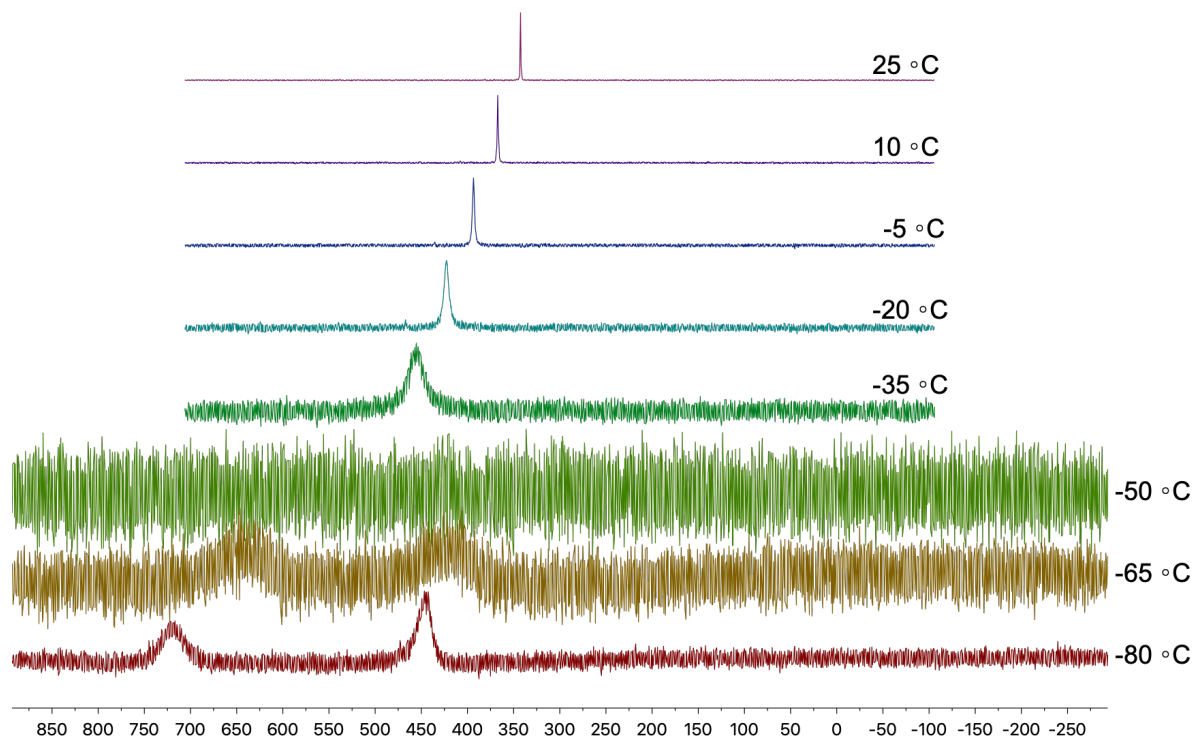

**Figure S3.** Variable temperature  $^{31}\text{P}\{^1\text{H}\}$  NMR of **1-Pr(NP\*)** in  $\text{d}_8$ -toluene.

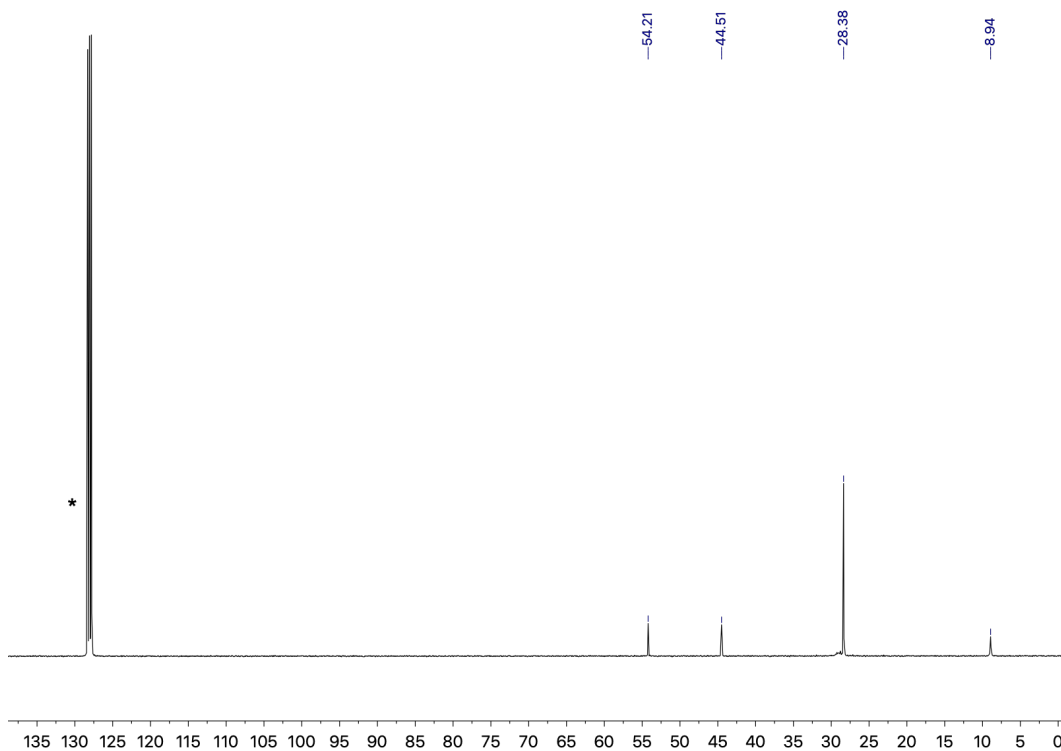

**Figure S4.**  $^{13}\text{C}\{^1\text{H}\}$  NMR of 1-Pr(NP\*) in  $\text{C}_6\text{D}_6$ . Peak of  $\text{C}_6\text{D}_5\text{H}$  is noted as \*.

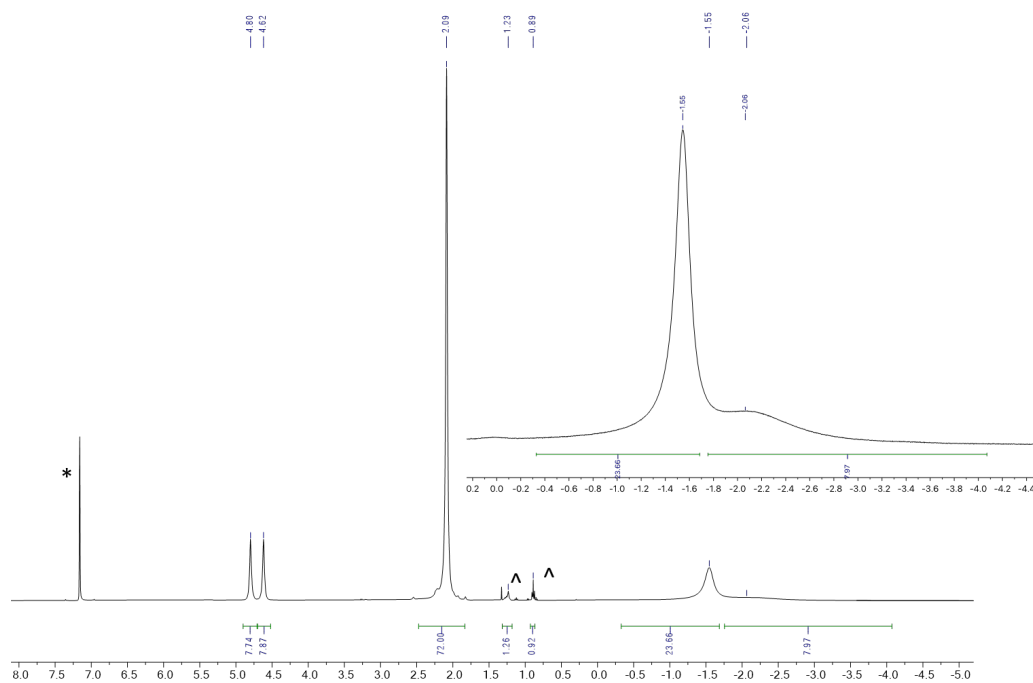

**Figure S5.**  $^1\text{H}$  NMR of 1-Nd(NP\*) in  $\text{C}_6\text{D}_6$ . Peak of  $\text{C}_6\text{D}_5\text{H}$  is noted as \*. Residual hexanes is denoted by ^.

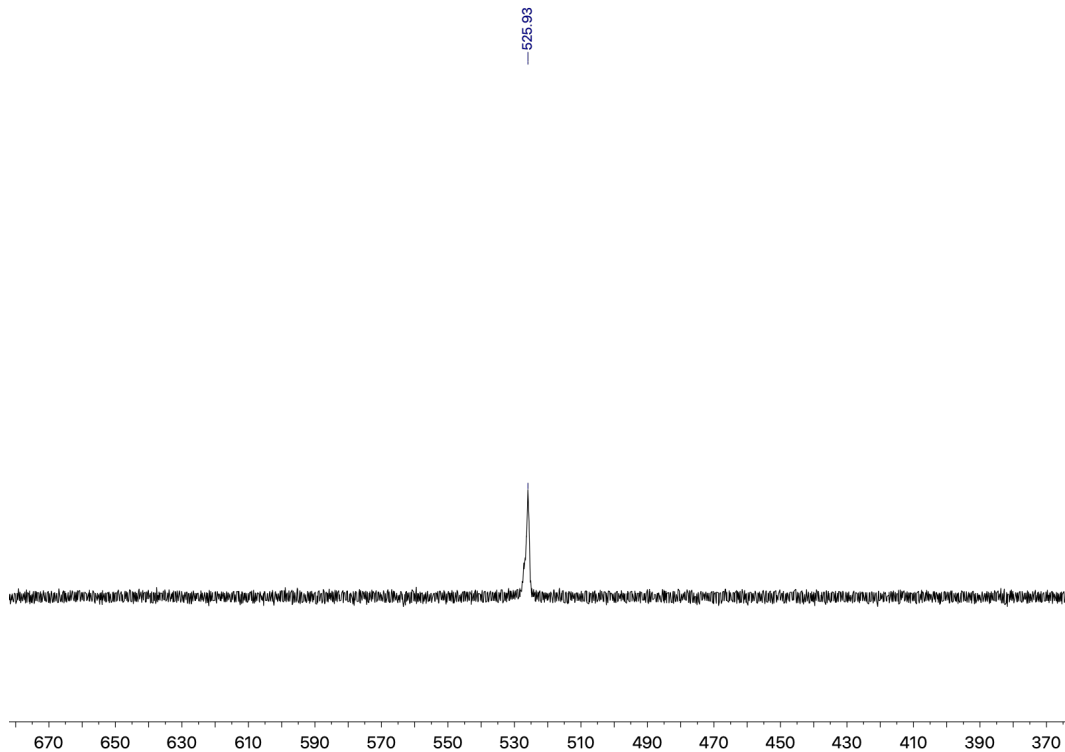

**Figure S6.**  $^{31}\text{P}\{^1\text{H}\}$  NMR of **1-Nd(NP\*)** in  $\text{C}_6\text{D}_6$ .

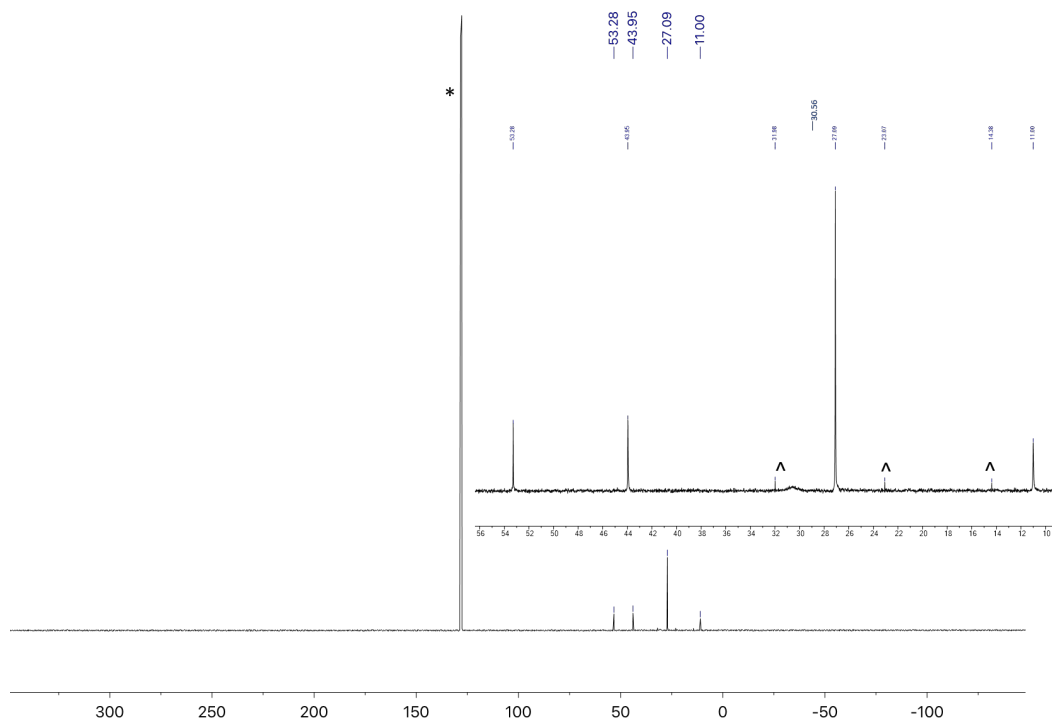

**Figure S7.**  $^{13}\text{C}\{^1\text{H}\}$  NMR of **1-Nd(NP\*)** in  $\text{C}_6\text{D}_6$ . Peak of  $\text{C}_6\text{D}_5\text{H}$  is noted as \*. Residual hexanes is denoted by ^.

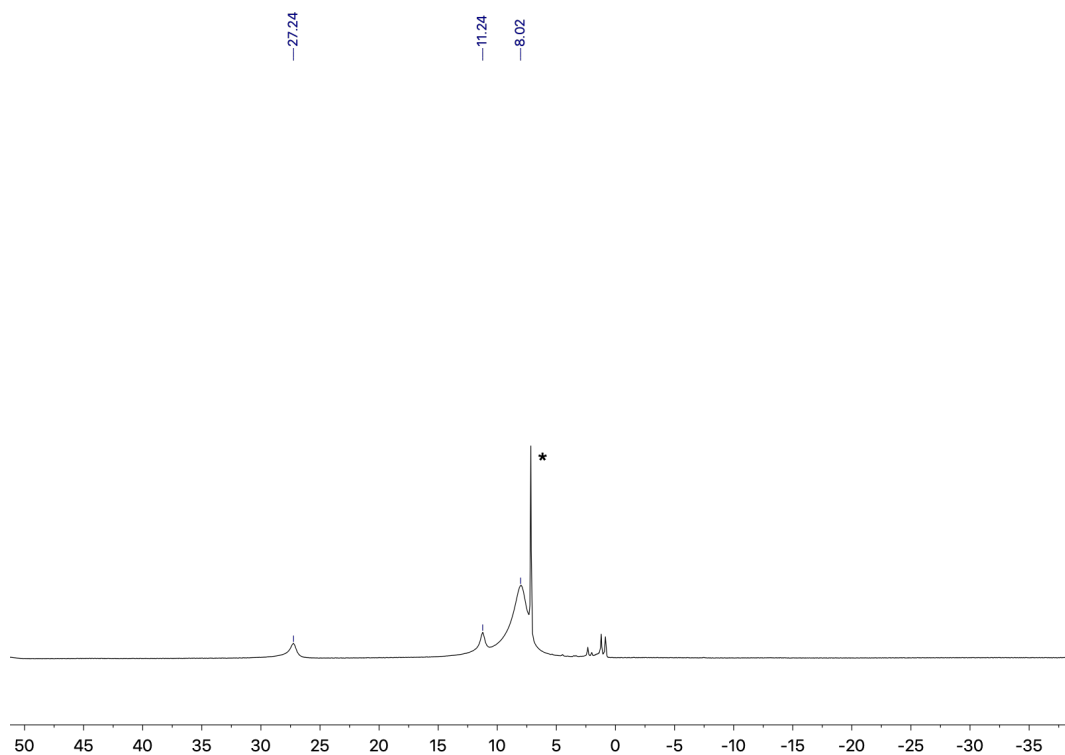

**Figure S8.**  $^1\text{H}$  NMR of **1-Dy(NP\*)** in  $\text{C}_6\text{D}_6$ . Peak of  $\text{C}_6\text{D}_5\text{H}$  is noted as \*. No peaks were assigned as the spectrum is very paramagnetically broadened.

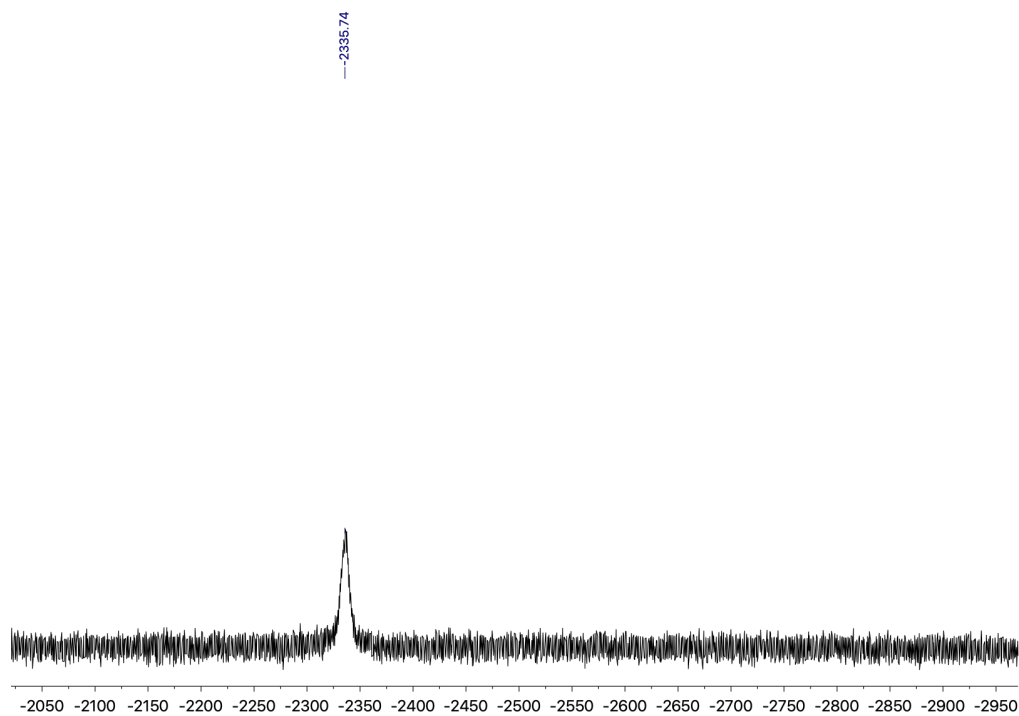

**Figure S9.**  $^{31}\text{P}\{^1\text{H}\}$  NMR of **1-Dy(NP\*)** in  $\text{C}_6\text{D}_6$ .



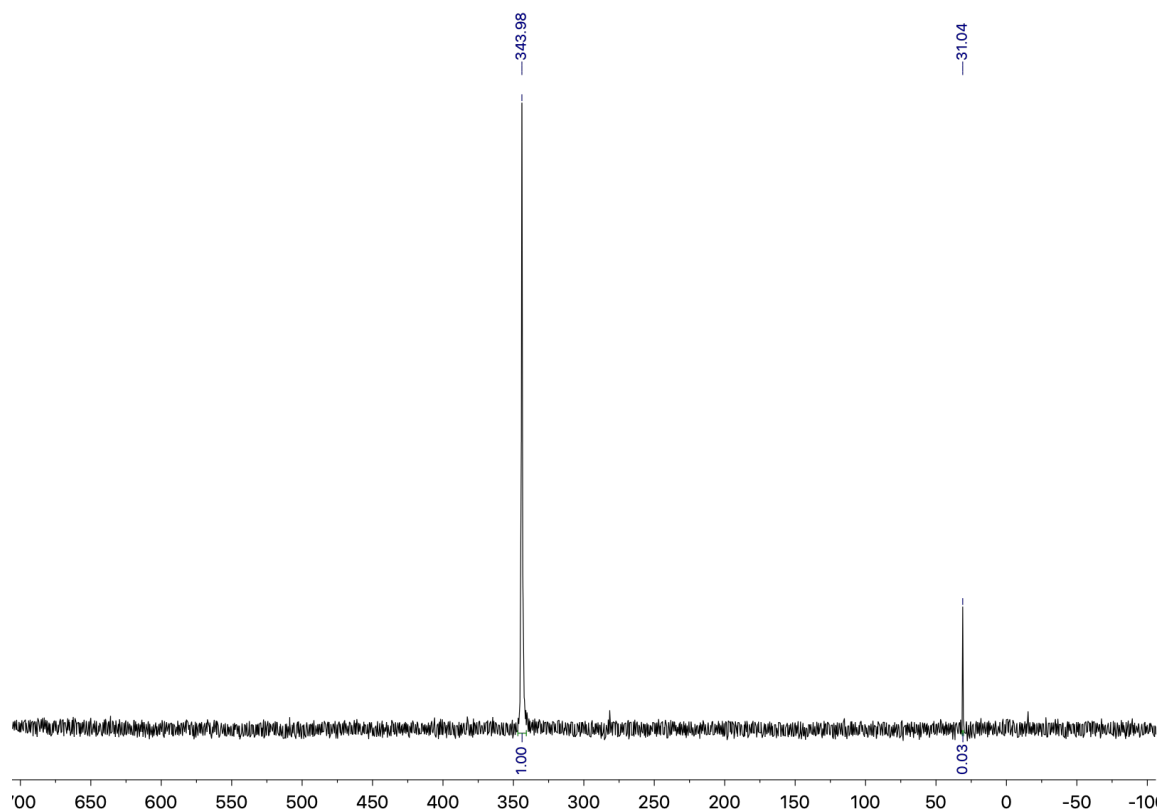

**Figure S10.**  $^{31}\text{P}\{^1\text{H}\}$  NMR of reaction products of the reaction of **1-Pr(NP\*)** and excess AgI in toluene at  $-35\text{ }^\circ\text{C}$  for one hour. The blue solution was then warmed to room temperature (blue color of solution fades) and toluene evacuated. NMR was taken of the residual product. The major compound present is **1-Pr(NP\*)** ( $\sim 343\text{ ppm}$ ) and the minor product is protonated ligand ( $\sim 31\text{ ppm}$ ).

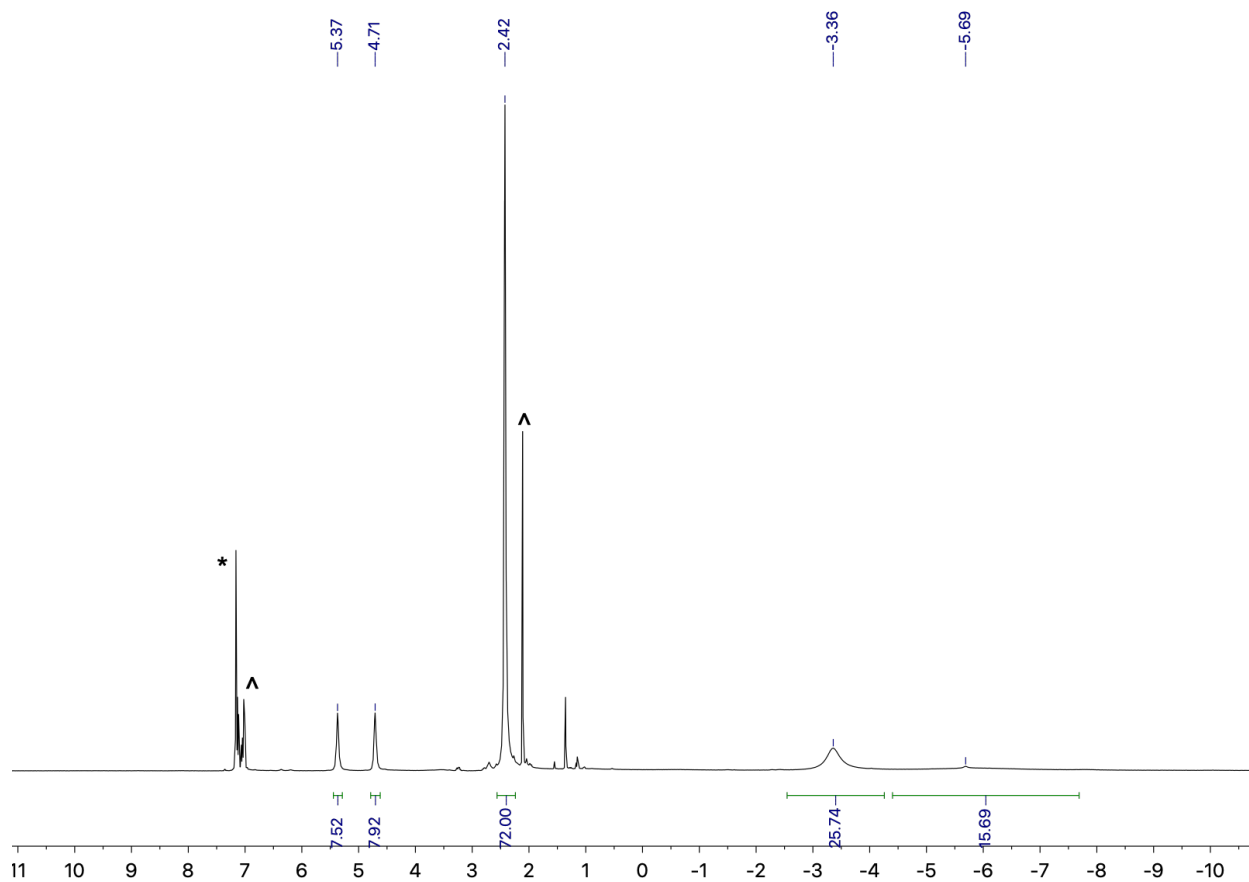

**Figure S11.**  $^1\text{H}$  NMR of reaction products of the reaction of **1-Pr(NP<sup>\*</sup>)** and excess AgI in toluene at  $-35\text{ }^\circ\text{C}$  for one hour. The blue solution was then warmed to room temperature (blue color of solution fades) and toluene evacuated. NMR was taken of the residual product. Peak of  $\text{C}_6\text{D}_5\text{H}$  is noted as \*. Peaks of residual toluene are denoted as ^. The labelled and integrated shifts are that of **1-Pr(NP<sup>\*</sup>)**.

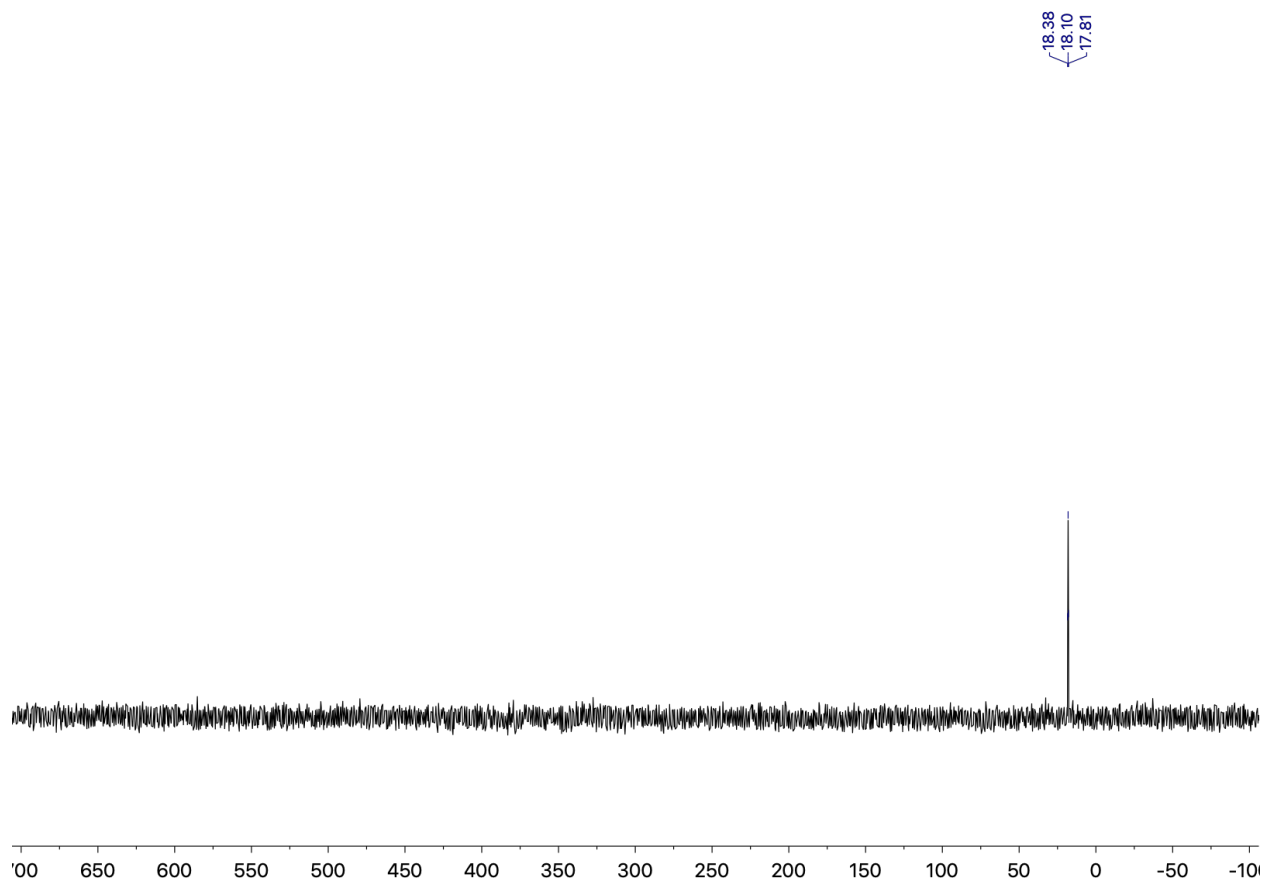

**Figure S12.**  $^{31}\text{P}\{^1\text{H}\}$  NMR of reaction products of the reaction of **1-Pr(NP<sup>\*</sup>)** and excess AgI in toluene at 25 °C for one hour. No darkening of the solution was observed. After one hour, the toluene was evacuated. NMR was taken of the residual product. Only **Ag(NP<sup>\*</sup>)** is observed.

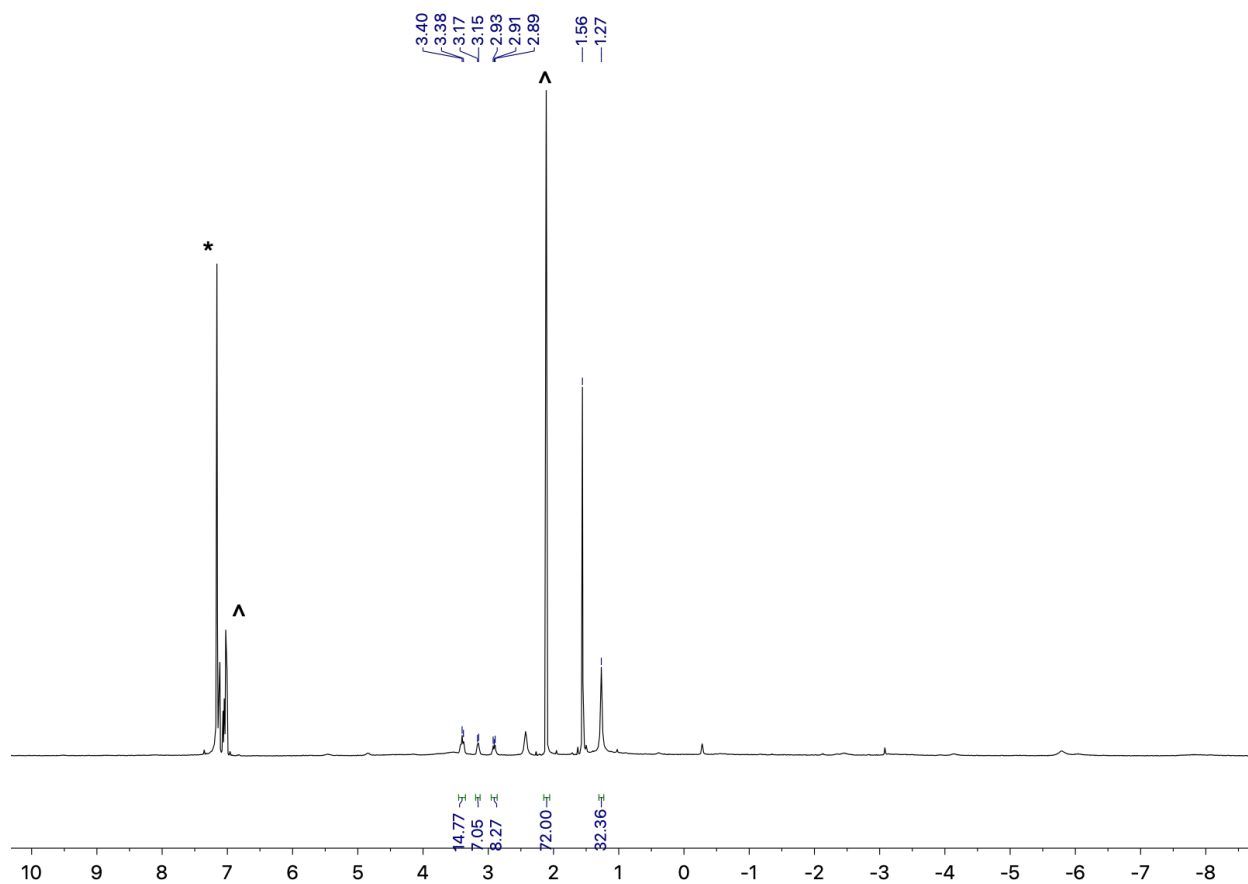

**Figure S13.**  $^1\text{H}$  NMR of reaction products of the reaction of **1-Pr(NP<sup>\*</sup>)** and excess AgI in toluene at 25 °C for one hour. No darkening of the solution was observed. After one hour, the toluene was evacuated. NMR was taken of the residual product. Peak of  $\text{C}_6\text{D}_5\text{H}$  is noted as \*. Peaks of residual toluene are denoted as ^. The labelled and integrated peaks are those of **Ag(NP<sup>\*</sup>)**.

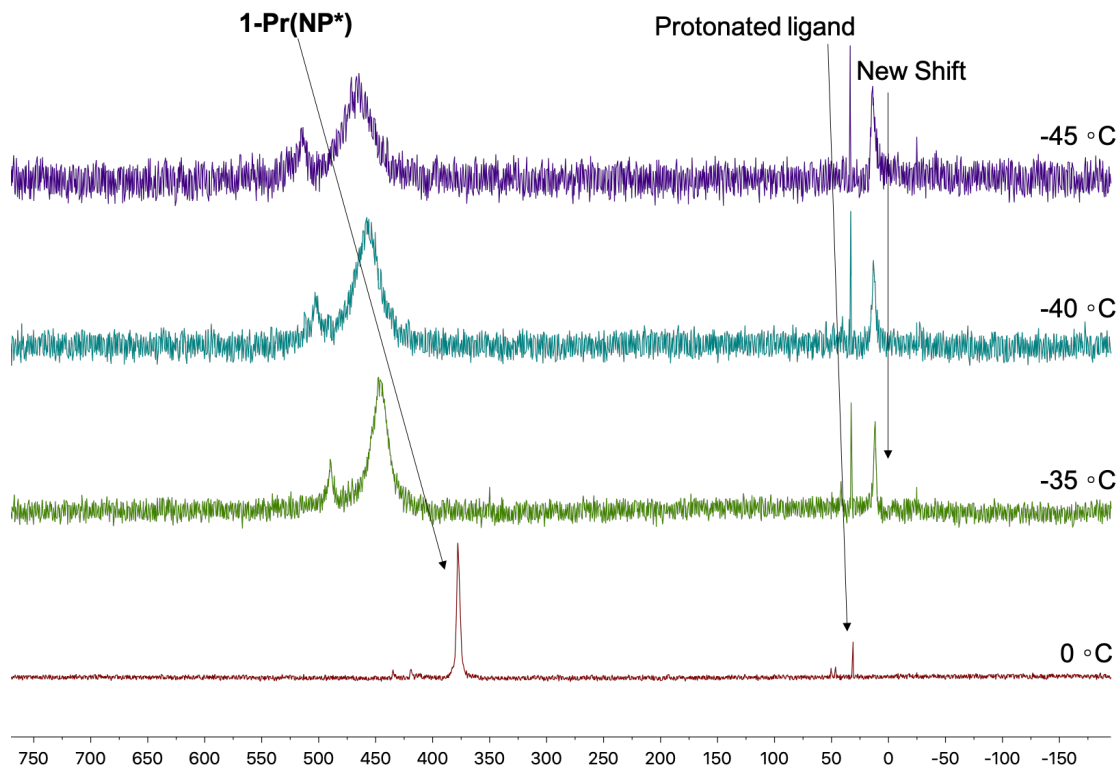

**Figure S14.** Variable temperature  $^{31}\text{P}\{^1\text{H}\}$  NMR of reaction products of the reaction of **1-Pr(NP\*)** and excess AgI in  $d_8$ -toluene at -35 °C for one hour.

## Crystallographic Analyses

Crystals suitable for X-ray diffraction were covered in paratone oil in a glove box and transferred to the diffractometer in a 20 mL capped vial. Crystals were mounted on a loop with paratone oil on a Bruker D8 VENTURE diffractometer. The crystals were cooled and kept at  $T = 100(2)$  K during data collections. The structures were solved with the ShelXT structure solution program using the Intrinsic Phasing solution method and by using Olex2 as the graphical interface.<sup>5-6</sup> The model was refined with version 2014/7 of XL using Least Squares minimization.<sup>7</sup>

**Table S1.** Crystallographic Data

|                                                   | <b>1-Pr(NP*)</b>                                                    | <b>1-Nd(NP*)</b>                                                                  | <b>1-Dy(NP*)</b>                                                     |
|---------------------------------------------------|---------------------------------------------------------------------|-----------------------------------------------------------------------------------|----------------------------------------------------------------------|
| <b>Empirical Formula</b>                          | C <sub>56</sub> H <sub>128</sub> KN <sub>16</sub> P <sub>4</sub> Pr | C <sub>64</sub> H <sub>148</sub> KN <sub>16</sub> P <sub>4</sub> NdO <sub>2</sub> | C <sub>60</sub> H <sub>138</sub> KN <sub>16</sub> OP <sub>4</sub> Dy |
| <b>Formula Weight</b>                             | 1329.63                                                             | 1481.20                                                                           | 1425.34                                                              |
| <b>Temperature (K)</b>                            | 100(2)                                                              | 100(1)                                                                            | 130(2)                                                               |
| <b>Crystal System</b>                             | triclinic                                                           | triclinic                                                                         | monoclinic                                                           |
| <b>Space Group</b>                                | P-1                                                                 | P1                                                                                | C2/c                                                                 |
| <b>a/Å</b>                                        | 13.0693(16)                                                         | 13.798(3)                                                                         | 22.4405(10)                                                          |
| <b>b/Å</b>                                        | 13.9895(17)                                                         | 13.807(3)                                                                         | 15.8568(7)                                                           |
| <b>c/Å</b>                                        | 23.626(3)                                                           | 24.382(4)                                                                         | 25.4452(16)                                                          |
| <b>α/°</b>                                        | 75.191(4)                                                           | 96.467(7)                                                                         | 90                                                                   |
| <b>β/°</b>                                        | 81.487(4)                                                           | 104.784(7)                                                                        | 114.536(2)                                                           |
| <b>γ/°</b>                                        | 65.497(4)                                                           | 110.524(7)                                                                        | 90                                                                   |
| <b>Volume/Å<sup>3</sup></b>                       | 3795.7(8)                                                           | 4100.3(14)                                                                        | 8236.7(7)                                                            |
| <b>Z</b>                                          | 2                                                                   | 2                                                                                 | 4                                                                    |
| <b>Z'</b>                                         | 1                                                                   | 2                                                                                 | 0.5                                                                  |
| <b>ρ(g/cm<sup>3</sup>)</b>                        | 1.163                                                               | 1.200                                                                             | 1.079                                                                |
| <b>μ(mm<sup>-1</sup>)</b>                         | 0.823                                                               | 0.810                                                                             | 1.079                                                                |
| <b>F(000)</b>                                     | 1428.0                                                              | -                                                                                 | -                                                                    |
| <b>Crystal Size/mm<sup>3</sup></b>                | 0.41 x 0.24 x 0.10                                                  | 0.41 x 0.25 x 0.21                                                                | 0.40 x 0.29 x 0.28                                                   |
| <b>Radiation</b>                                  | MoKα (λ=0.71073)                                                    | MoKα (λ=0.71073)                                                                  | MoKα (λ=0.71073)                                                     |
| <b>2θ range for data collection(°)</b>            | 4.464 to 61.15                                                      | 2.410 to 27.585                                                                   | 2.037 to 36.349                                                      |
| <b>Index Ranges</b>                               | *-18 ≤ h ≤ 18, -19 ≤ k ≤ 19, -33 ≤ l ≤ 33                           | *-17 ≤ h ≤ 17, -17 ≤ k ≤ 17, -30 ≤ l ≤ 31                                         | *-37 ≤ h ≤ 37, -26 ≤ k ≤ 26, -37 ≤ l ≤ 42                            |
| <b>Reflections Collected</b>                      | 81875                                                               | 88316                                                                             | 167230                                                               |
| <b>Independent Reflections</b>                    | 23153 [R <sub>int</sub> = 0.0677, R <sub>sigma</sub> = 0.0704]      | 32769 [R <sub>int</sub> = 0.036, R <sub>sigma</sub> = 0.0488]                     | 19958 [R <sub>int</sub> = 0.0486, R <sub>sigma</sub> = 0.0277]       |
| <b>Data/Restraints/Parameters</b>                 | 23153/2032/1043                                                     | 32769/1268/1660                                                                   | 19958/88/446                                                         |
| <b>Goodness-of-Fit on F<sup>2</sup></b>           | 1.059                                                               | 1.045                                                                             | 1.099                                                                |
| <b>Final R Indexes [I &gt; 2σ(I)]</b>             | R <sub>1</sub> =0.0555, wR <sub>2</sub> =0.1224                     | R <sub>1</sub> =0.0363, wR <sub>2</sub> =0.0786                                   | R <sub>1</sub> =0.0401, wR <sub>2</sub> =0.1002                      |
| <b>Final R Indexes [all data]</b>                 | R <sub>1</sub> =0.0658, wR <sub>2</sub> =0.1271                     | R <sub>1</sub> =0.0383, wR <sub>2</sub> =0.0801                                   | R <sub>1</sub> =0.0438, wR <sub>2</sub> =0.1019                      |
| <b>Largest Diff. Peak/Hole/ (e Å<sup>3</sup>)</b> | 1.54/-1.36                                                          | 1.377/-1.018                                                                      | 2.462/-1.519                                                         |
| <b>Completeness to 2θ</b>                         | 99.9                                                                | 99.9                                                                              | 99.8                                                                 |

**Table S2.** Important bond lengths and angles for **1-Pr(NP\*)**, **1-Nd(NP\*)**, and **1-Dy(NP\*)**. Metrics are reported for both molecules in the asymmetric unit for **1-Nd(NP\*)**.

|                    | <i>Ln-N K capped</i> (Å) | <i>Ln-N terminal</i> (Å) | <i>N<sub>imido</sub>-P average</i> (Å) | <i>Ln-N-P K capped</i> (°) | <i>Ln-N-P terminal</i> (°) | <i>N-Ln-N average</i> (°) |
|--------------------|--------------------------|--------------------------|----------------------------------------|----------------------------|----------------------------|---------------------------|
| <b>1-Pr(NP*)</b>   | 2.348(5)                 | 2.299(5)                 | 1.533(5)                               | 167.7(4)                   | 165.3(3)                   | 109.2(2)                  |
| <b>1-Nd(NP*) 1</b> | 2.344(9)                 | 2.286(9)                 | 1.527(9), 1.557(8)                     | 162.5(5)                   | 169.4(6)                   | 109.4(3)                  |
| <b>1-Nd(NP*) 2</b> | 2.33(1)                  | 2.291(9)                 | 1.52(1)                                | 165.4(6)                   | 172.1(6)                   | 109.3(3)                  |
| <b>1-Dy(NP*)</b>   | 2.260(2)                 | 2.222(2)                 | 1.525(2)                               | 167.7(1)                   | 168.3(1)                   | 109.4(7)                  |

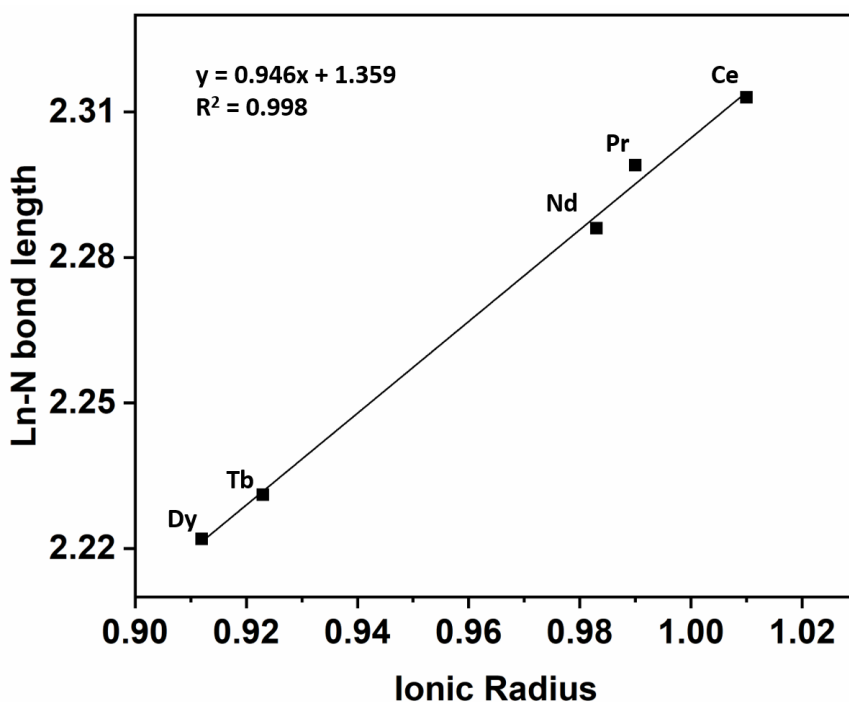

**Table S15.** Ln-N bond lengths comparison for terminal ligands for **1-Ln(NP\*)** where Ln = Ce,<sup>8</sup> Pr, Nd, Tb,<sup>2</sup> and Dy. The ionic radius used is for 6-coordinate Ln ions.

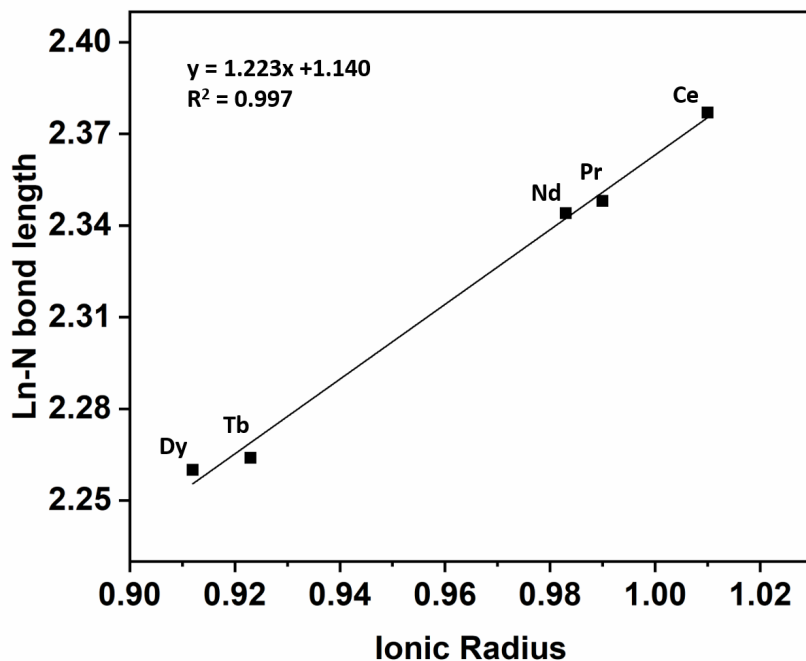

**Table S16.** Ln-N bond lengths comparison for potassium capped ligands for **1-Ln(NP\*)** where Ln = Ce,<sup>8</sup> Pr, Nd, Tb,<sup>2</sup> and Dy. The ionic radius used is for 6-coordinate Ln ions.

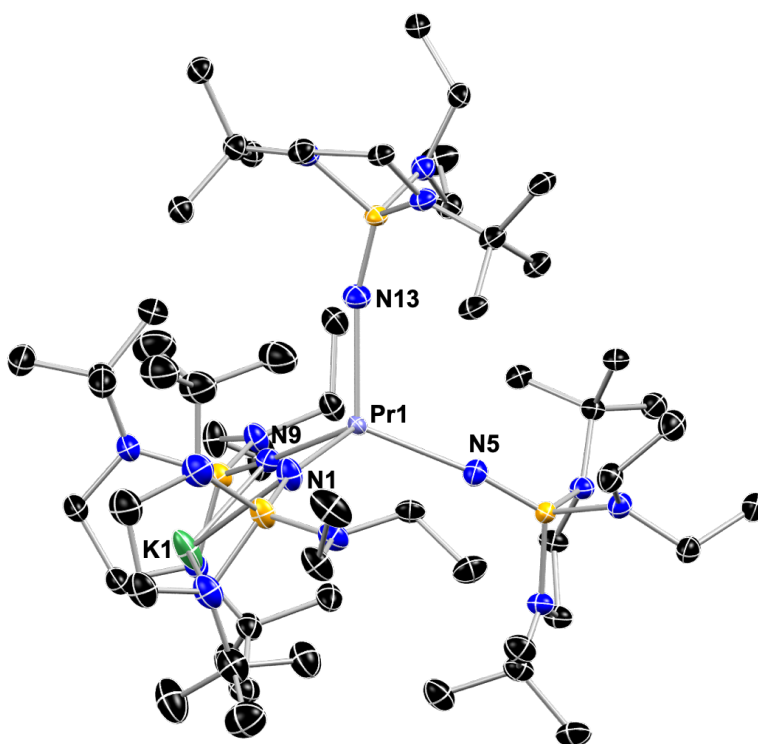

**Figure S17.** Molecular structure of **1-Pr(NP\*)** at with thermal ellipsoids shown at 50% probability. H atoms are omitted for clarity.



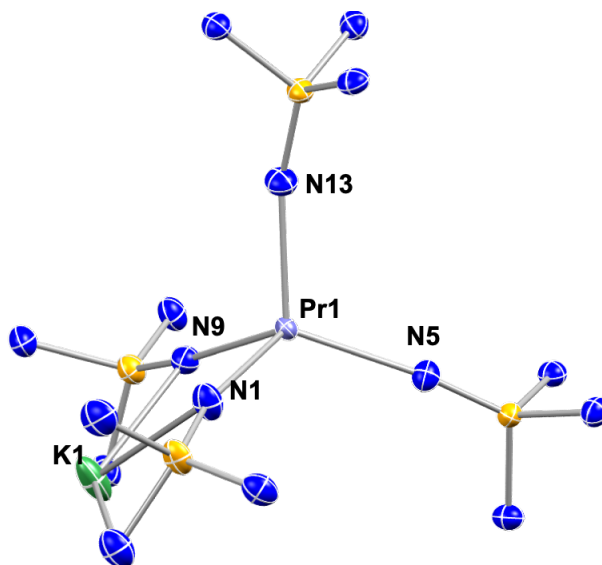

**Figure S18.** Molecular structure of **1-Pr(NP\*)** at with thermal ellipsoids shown at 50% probability. H and C atoms are omitted for clarity.

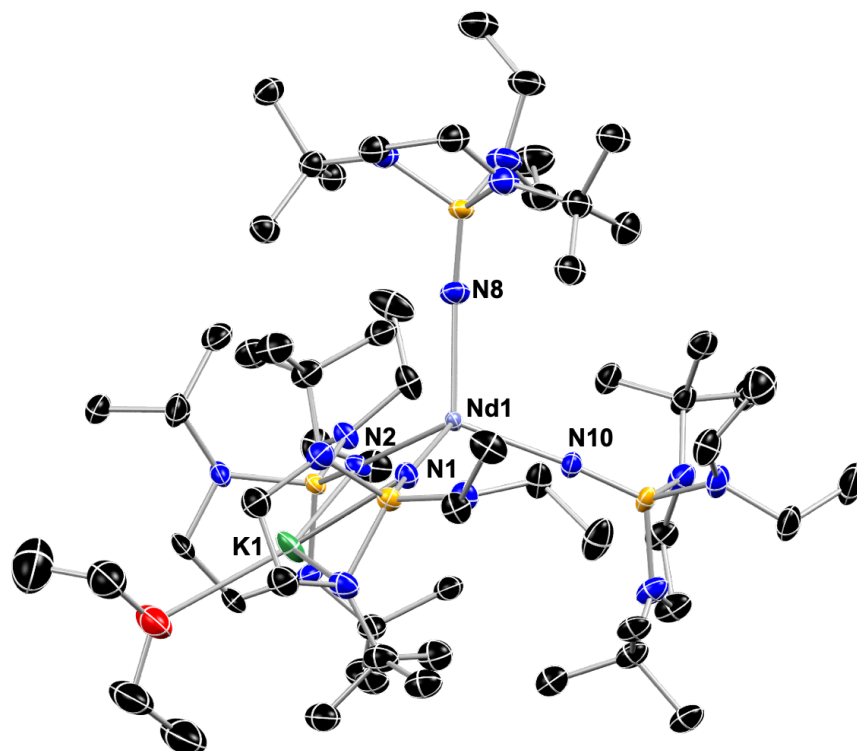

**Figure S19.** Molecular structure of **1-Nd(NP\*)** at with thermal ellipsoids shown at 50% probability. H atoms are omitted for clarity.

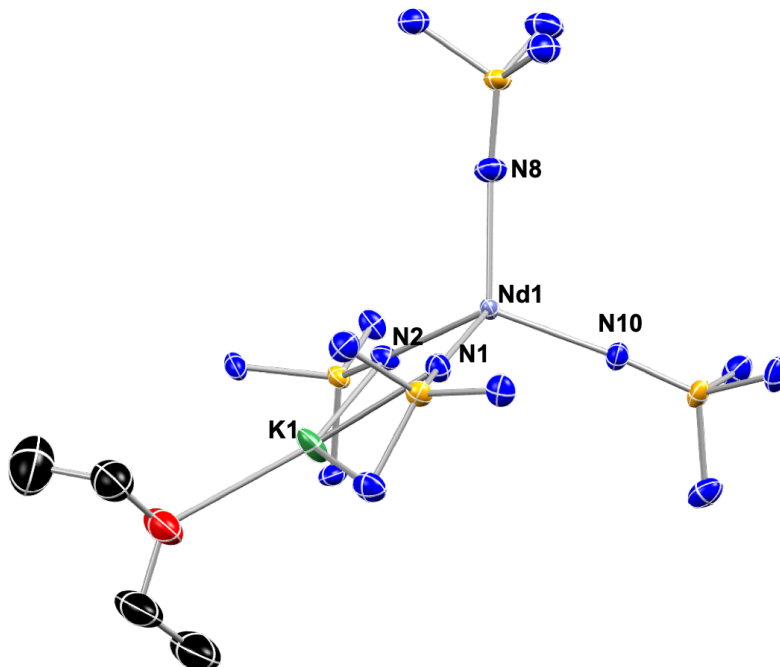

**Figure S20.** Molecular structure of **1-Nd(NP\*)** at with thermal ellipsoids shown at 50% probability. H and C atoms are omitted for clarity.

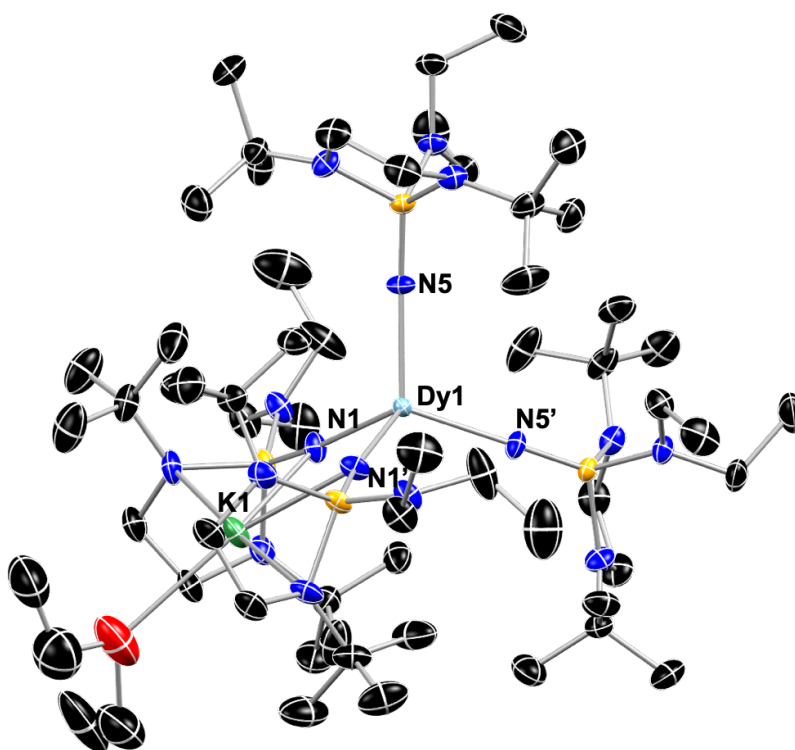

**Figure S21.** Molecular structure of **1-Dy(NP\*)** at with thermal ellipsoids shown at 50% probability. H atoms are omitted for clarity.

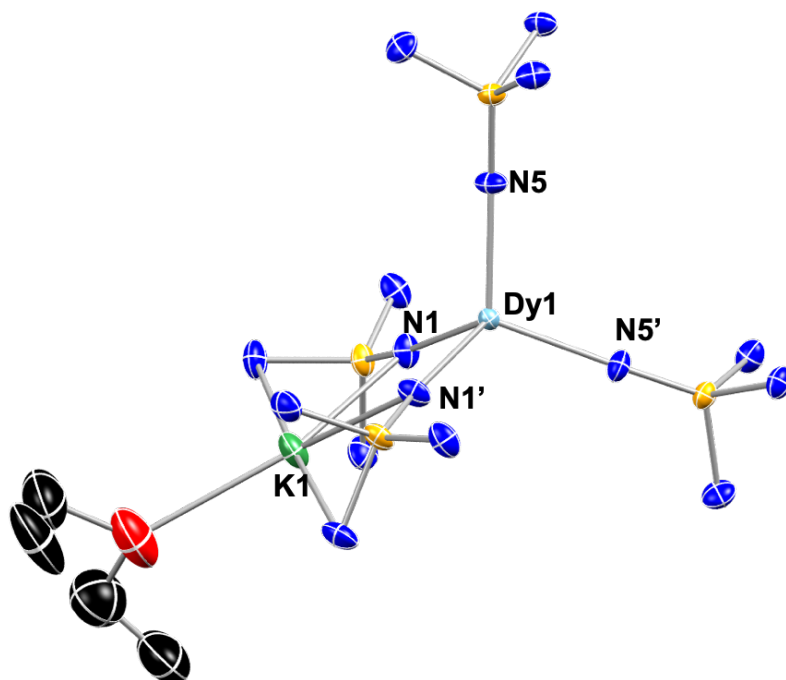

**Figure S22.** Molecular structure of **1-Dy(NP\*)** at with thermal ellipsoids shown at 50% probability. H and C atoms are omitted for clarity.

**Table S3.** Bond Lengths in Å for **1-Pr(NP\*)**.

| <b>Atom</b> | <b>Atom</b> | <b>Length/Å</b> |
|-------------|-------------|-----------------|
| Pr1         | N1          | 2.362(3)        |
| Pr1         | N5          | 2.304(2)        |
| Pr1         | N9          | 2.335(3)        |
| Pr1         | N13         | 2.293(2)        |
| P1          | N1          | 1.532(3)        |
| P1          | N2          | 1.705(3)        |
| P1          | N3          | 1.711(3)        |
| P1          | N4          | 1.680(3)        |
| P2          | N5          | 1.531(2)        |
| P2          | N6          | 1.694(2)        |
| P2          | N7          | 1.719(2)        |
| P2          | N8          | 1.687(2)        |
| P3          | N9          | 1.535(3)        |
| P3          | N10         | 1.696(3)        |
| P3          | N11         | 1.710(3)        |
| P3          | N12         | 1.674(3)        |
| P4          | N13         | 1.531(3)        |
| P4          | N14         | 1.711(3)        |
| P4          | N15         | 1.703(3)        |
| P4          | N16         | 1.684(3)        |
| N2          | C1          | 1.441(4)        |
| N2          | C3          | 1.492(4)        |
| N3          | C2          | 1.456(4)        |
| N3          | C7          | 1.475(4)        |
| N4          | C11         | 1.459(3)        |
| N4          | C13         | 1.470(3)        |
| N6          | C15         | 1.439(3)        |
| N6          | C17         | 1.479(3)        |
| N7          | C16         | 1.466(3)        |
| N7          | C21         | 1.481(3)        |
| N8          | C25         | 1.459(3)        |
| N8          | C27         | 1.467(3)        |
| N10         | C29         | 1.425(4)        |
| N10         | C31         | 1.482(4)        |
| N11         | C30         | 1.439(4)        |
| N11         | C35         | 1.477(4)        |
| N12         | C39         | 1.457(3)        |
| N12         | C41         | 1.464(3)        |
| N14         | C43         | 1.447(4)        |
| N14         | C45         | 1.491(4)        |
| N15         | C44         | 1.447(4)        |
| N15         | C49         | 1.474(4)        |
| N16         | C53         | 1.459(3)        |
| N16         | C55         | 1.466(3)        |
| C1          | C2          | 1.505(4)        |
| C3          | C6          | 1.535(4)        |
| C3          | C4          | 1.522(4)        |
| C3          | C5          | 1.530(4)        |
| C7          | C8          | 1.527(4)        |
| C7          | C9          | 1.554(4)        |
| C7          | C10         | 1.524(4)        |
| C11         | C12         | 1.521(4)        |

| Atom | Atom | Length/Å |
|------|------|----------|
| C13  | C14  | 1.505(4) |
| C15  | C16  | 1.510(4) |
| C17  | C18  | 1.523(4) |
| C17  | C19  | 1.535(4) |
| C17  | C20  | 1.536(4) |
| C21  | C22  | 1.528(4) |
| C21  | C23  | 1.545(4) |
| C21  | C24  | 1.524(4) |
| C25  | C26  | 1.518(4) |
| C27  | C28  | 1.507(4) |
| C29  | C30  | 1.495(4) |
| C31  | C32  | 1.523(4) |
| C31  | C33  | 1.534(4) |
| C31  | C34  | 1.536(4) |
| C35  | C36  | 1.524(4) |
| C35  | C37  | 1.551(4) |
| C35  | C38  | 1.525(4) |
| C39  | C40  | 1.517(4) |
| C41  | C42  | 1.501(4) |
| C43  | C44  | 1.509(4) |
| C45  | C46  | 1.523(4) |
| C45  | C47  | 1.529(4) |
| C45  | C48  | 1.537(4) |
| C49  | C50  | 1.528(4) |
| C49  | C51  | 1.548(4) |
| C49  | C52  | 1.526(4) |
| C53  | C54  | 1.521(4) |
| C55  | C56  | 1.502(4) |

**Table S4.** Bond Angles in ° for **1-Pr(NP\*)**.

| Atom | Atom | Atom | Angle/°    |
|------|------|------|------------|
| N5   | Pr1  | N1   | 118.33(16) |
| N5   | Pr1  | N9   | 113.1(2)   |
| N9   | Pr1  | N1   | 95.1(2)    |
| N13  | Pr1  | N1   | 107.7(2)   |
| N13  | Pr1  | N5   | 112.4(2)   |
| N13  | Pr1  | N9   | 108.6(3)   |
| P1   | N1   | Pr1  | 166.9(3)   |
| P2   | N5   | Pr1  | 167.75(18) |
| P3   | N9   | Pr1  | 168.5(4)   |
| P4   | N13  | Pr1  | 162.9(4)   |
| N1   | P1   | N2   | 119.8(2)   |
| N1   | P1   | N3   | 117.7(2)   |
| N1   | P1   | N4   | 113.7(2)   |
| N2   | P1   | N3   | 91.56(16)  |
| N4   | P1   | N2   | 104.9(2)   |
| N4   | P1   | N3   | 106.3(2)   |
| N5   | P2   | N6   | 120.12(15) |
| N5   | P2   | N7   | 120.34(14) |
| N5   | P2   | N8   | 113.10(14) |

| Atom | Atom | Atom | Angle <sup>o</sup> |
|------|------|------|--------------------|
| N6   | P2   | N7   | 90.69(11)          |
| N8   | P2   | N6   | 106.19(13)         |
| N8   | P2   | N7   | 103.16(13)         |
| N9   | P3   | N10  | 118.8(2)           |
| N9   | P3   | N11  | 118.2(2)           |
| N9   | P3   | N12  | 113.6(2)           |
| N10  | P3   | N11  | 91.34(15)          |
| N12  | P3   | N10  | 106.9(2)           |
| N12  | P3   | N11  | 105.2(2)           |
| N13  | P4   | N14  | 120.4(2)           |
| N13  | P4   | N15  | 119.6(2)           |
| N13  | P4   | N16  | 113.4(2)           |
| N15  | P4   | N14  | 90.96(15)          |
| N16  | P4   | N14  | 103.4(2)           |
| N16  | P4   | N15  | 105.9(2)           |
| C1   | N2   | P1   | 112.2(3)           |
| C1   | N2   | C3   | 117.2(3)           |
| C3   | N2   | P1   | 122.4(2)           |
| C2   | N3   | P1   | 112.5(2)           |
| C2   | N3   | C7   | 117.6(3)           |
| C7   | N3   | P1   | 126.0(3)           |
| C11  | N4   | P1   | 121.1(3)           |
| C11  | N4   | C13  | 116.2(3)           |
| C13  | N4   | P1   | 120.5(3)           |
| C15  | N6   | P2   | 114.15(18)         |
| C15  | N6   | C17  | 118.6(2)           |
| C17  | N6   | P2   | 127.21(19)         |
| C16  | N7   | P2   | 108.48(18)         |
| C16  | N7   | C21  | 116.6(2)           |
| C21  | N7   | P2   | 123.37(18)         |
| C25  | N8   | P2   | 120.15(19)         |
| C25  | N8   | C27  | 116.2(2)           |
| C27  | N8   | P2   | 120.4(2)           |
| C29  | N10  | P3   | 114.3(2)           |
| C29  | N10  | C31  | 120.1(3)           |
| C31  | N10  | P3   | 125.4(2)           |
| C30  | N11  | P3   | 114.2(2)           |
| C30  | N11  | C35  | 119.6(3)           |
| C35  | N11  | P3   | 124.0(3)           |
| C39  | N12  | P3   | 121.4(3)           |
| C39  | N12  | C41  | 116.8(3)           |
| C41  | N12  | P3   | 121.7(3)           |
| C43  | N14  | P4   | 109.8(2)           |
| C43  | N14  | C45  | 117.8(3)           |
| C45  | N14  | P4   | 121.6(2)           |
| C44  | N15  | P4   | 113.8(2)           |
| C44  | N15  | C49  | 119.4(3)           |
| C49  | N15  | P4   | 125.7(2)           |
| C53  | N16  | P4   | 120.7(3)           |
| C53  | N16  | C55  | 116.3(3)           |
| C55  | N16  | P4   | 120.4(3)           |
| N2   | C1   | C2   | 105.8(3)           |
| N2   | C3   | C6   | 109.5(3)           |
| N2   | C3   | C4   | 110.7(3)           |

| Atom | Atom | Atom | Angle <sup>o</sup> |
|------|------|------|--------------------|
| N2   | C3   | C5   | 108.9(3)           |
| C4   | C3   | C6   | 109.3(3)           |
| C4   | C3   | C5   | 109.0(3)           |
| C5   | C3   | C6   | 109.4(3)           |
| N3   | C2   | C1   | 105.7(3)           |
| N3   | C7   | C8   | 110.2(3)           |
| N3   | C7   | C9   | 110.0(3)           |
| N3   | C7   | C10  | 111.4(3)           |
| C8   | C7   | C9   | 108.2(3)           |
| C10  | C7   | C8   | 109.4(3)           |
| C10  | C7   | C9   | 107.7(3)           |
| N4   | C11  | C12  | 114.0(4)           |
| N4   | C13  | C14  | 115.9(4)           |
| N6   | C15  | C16  | 106.2(2)           |
| N6   | C17  | C18  | 111.1(2)           |
| N6   | C17  | C19  | 109.2(2)           |
| N6   | C17  | C20  | 109.7(3)           |
| C18  | C17  | C19  | 108.5(3)           |
| C18  | C17  | C20  | 109.3(3)           |
| C19  | C17  | C20  | 109.0(3)           |
| N7   | C16  | C15  | 104.1(2)           |
| N7   | C21  | C22  | 109.4(2)           |
| N7   | C21  | C23  | 110.6(2)           |
| N7   | C21  | C24  | 110.8(2)           |
| C22  | C21  | C23  | 109.3(2)           |
| C24  | C21  | C22  | 108.9(2)           |
| C24  | C21  | C23  | 107.8(2)           |
| N8   | C25  | C26  | 114.2(3)           |
| N8   | C27  | C28  | 116.3(3)           |
| N10  | C29  | C30  | 108.7(3)           |
| N10  | C31  | C32  | 110.8(3)           |
| N10  | C31  | C33  | 109.2(3)           |
| N10  | C31  | C34  | 110.0(3)           |
| C32  | C31  | C33  | 108.7(3)           |
| C32  | C31  | C34  | 109.0(3)           |
| C33  | C31  | C34  | 109.1(3)           |
| N11  | C30  | C29  | 108.3(3)           |
| N11  | C35  | C36  | 110.0(3)           |
| N11  | C35  | C37  | 109.8(3)           |
| N11  | C35  | C38  | 110.5(3)           |
| C36  | C35  | C37  | 109.2(3)           |
| C36  | C35  | C38  | 109.4(3)           |
| C38  | C35  | C37  | 107.9(3)           |
| N12  | C39  | C40  | 114.6(4)           |
| N12  | C41  | C42  | 115.6(4)           |
| N14  | C43  | C44  | 105.8(3)           |
| N14  | C45  | C46  | 110.7(3)           |
| N14  | C45  | C47  | 109.3(3)           |
| N14  | C45  | C48  | 109.4(3)           |
| C46  | C45  | C47  | 108.8(3)           |
| C46  | C45  | C48  | 109.1(3)           |
| C47  | C45  | C48  | 109.4(3)           |
| N15  | C44  | C43  | 106.7(3)           |
| N15  | C49  | C50  | 110.1(3)           |

| Atom | Atom | Atom | Angle/°  |
|------|------|------|----------|
| N15  | C49  | C51  | 110.3(3) |
| N15  | C49  | C52  | 110.3(3) |
| C50  | C49  | C51  | 109.3(3) |
| C52  | C49  | C50  | 108.7(3) |
| C52  | C49  | C51  | 108.2(3) |
| N16  | C53  | C54  | 114.0(3) |
| N16  | C55  | C56  | 116.7(4) |

**Table S5.** Bond Lengths in Å for **1-Nd(NP<sup>\*</sup>)**.

| Atom | Atom | Length/Å  |
|------|------|-----------|
| Nd1  | N1   | 2.347(9)  |
| Nd1  | N2   | 2.340(8)  |
| Nd1  | N8   | 2.284(9)  |
| Nd1  | N10  | 2.288(9)  |
| P1   | N1   | 1.527(9)  |
| P1   | N3   | 1.695(9)  |
| P1   | N4   | 1.716(8)  |
| P1   | N5   | 1.744(8)  |
| P1   | K1   | 3.382(4)  |
| P2   | N2   | 1.557(8)  |
| P2   | N6   | 1.712(7)  |
| P2   | N7   | 1.684(7)  |
| P2   | N12  | 1.666(8)  |
| P2   | K1   | 3.555(4)  |
| P3   | N8   | 1.532(9)  |
| P3   | N9   | 1.703(8)  |
| P3   | N30  | 1.718(9)  |
| P3   | N35  | 1.690(8)  |
| P4   | N10  | 1.538(10) |
| P4   | N11  | 1.677(9)  |
| P4   | N46  | 1.698(8)  |
| P4   | N51  | 1.678(8)  |
| N1   | K1   | 2.770(8)  |
| N2   | K1   | 2.762(9)  |
| N3   | C13  | 1.444(12) |
| N3   | C3   | 1.440(12) |
| N4   | C1   | 1.430(11) |
| N4   | C8   | 1.486(11) |
| N5   | C2   | 1.456(12) |
| N5   | C121 | 1.469(12) |
| N5   | K1   | 3.133(8)  |
| N6   | C18  | 1.455(9)  |
| N6   | C23  | 1.485(10) |
| N7   | C19  | 1.463(10) |
| N7   | C20  | 1.464(11) |
| N9   | C27  | 1.461(12) |
| N9   | C28  | 1.467(13) |
| N11  | C41  | 1.503(11) |
| N11  | C44  | 1.440(12) |
| N12  | C4   | 1.449(10) |



| Atom | Atom | Length/Å  |
|------|------|-----------|
| N12  | C113 | 1.476(10) |
| C1   | C2   | 1.487(13) |
| C4   | C114 | 1.520(14) |
| C5   | C121 | 1.563(13) |
| C6   | C121 | 1.519(12) |
| C7   | C121 | 1.514(13) |
| C8   | C9   | 1.538(12) |
| C8   | C10  | 1.525(12) |
| C8   | C11  | 1.525(12) |
| C12  | C41  | 1.546(12) |
| C13  | C14  | 1.553(11) |
| C3   | C16  | 1.517(13) |
| C18  | C19  | 1.539(13) |
| C20  | C21  | 1.558(12) |
| C20  | C22  | 1.538(11) |
| C20  | C37  | 1.537(11) |
| C23  | C24  | 1.537(10) |
| C23  | C25  | 1.536(11) |
| C23  | C26  | 1.545(12) |
| C26  | K1   | 3.457(9)  |
| C27  | C109 | 1.515(15) |
| C27  | C119 | 1.521(13) |
| C27  | C120 | 1.534(13) |
| C28  | C29  | 1.518(13) |
| C29  | N30  | 1.451(12) |
| N30  | C31  | 1.509(10) |
| C31  | C32  | 1.536(11) |
| C31  | C33  | 1.522(12) |
| C31  | C34  | 1.532(12) |
| N35  | C36  | 1.432(12) |
| N35  | C39  | 1.454(11) |
| C36  | C38  | 1.461(14) |
| C39  | C40  | 1.501(13) |
| C41  | C42  | 1.513(12) |
| C41  | C43  | 1.531(11) |
| C44  | C45  | 1.503(12) |
| C45  | N46  | 1.431(12) |
| N46  | C47  | 1.498(11) |
| C47  | C48  | 1.517(12) |
| C47  | C49  | 1.562(12) |
| C47  | C50  | 1.523(11) |
| N51  | C52  | 1.476(11) |
| N51  | C53  | 1.456(13) |
| C52  | C115 | 1.562(13) |
| C53  | C118 | 1.491(15) |
| C112 | C113 | 1.541(13) |
| Nd2  | N13  | 2.312(9)  |
| Nd2  | N19  | 2.286(9)  |
| Nd2  | N23  | 2.295(9)  |
| Nd2  | N27  | 2.346(10) |
| P5   | N13  | 1.538(9)  |
| P5   | N14  | 1.696(9)  |
| P5   | N16  | 1.723(9)  |
| P5   | N18  | 1.679(9)  |

| Atom | Atom | Length/Å  |
|------|------|-----------|
| P5   | K2   | 3.363(4)  |
| P6   | N19  | 1.553(9)  |
| P6   | N20  | 1.684(10) |
| P6   | N21  | 1.721(9)  |
| P6   | N22  | 1.686(9)  |
| P7   | N23  | 1.518(9)  |
| P7   | N24  | 1.709(8)  |
| P7   | N25  | 1.692(9)  |
| P7   | N26  | 1.698(8)  |
| P8   | N27  | 1.510(10) |
| P8   | N28  | 1.707(9)  |
| P8   | N29  | 1.692(8)  |
| P8   | N17  | 1.737(9)  |
| P8   | K2   | 3.384(4)  |
| N13  | K2   | 2.781(10) |
| N14  | C54  | 1.462(12) |
| N14  | C57  | 1.490(13) |
| C15  | C54  | 1.531(14) |
| N16  | C58  | 1.478(13) |
| N16  | C59  | 1.513(13) |
| N16  | K2   | 3.167(8)  |
| N18  | C62  | 1.500(12) |
| N18  | C64  | 1.424(14) |
| N20  | C66  | 1.442(12) |
| N20  | C72  | 1.481(12) |
| N21  | C67  | 1.471(12) |
| N21  | C68  | 1.470(13) |
| N22  | C76  | 1.456(12) |
| N22  | C78  | 1.446(12) |
| N24  | C80  | 1.462(12) |
| N24  | C86  | 1.483(13) |
| N25  | C81  | 1.449(12) |
| N25  | C82  | 1.479(12) |
| N26  | C90  | 1.447(11) |
| N26  | C92  | 1.444(11) |
| N27  | K2   | 2.804(10) |
| N28  | C94  | 1.499(13) |
| N28  | C98  | 1.456(13) |
| N29  | C99  | 1.456(13) |
| N29  | C101 | 1.459(13) |
| N17  | C103 | 1.482(12) |
| N17  | C111 | 1.453(12) |
| N17  | K2   | 3.167(8)  |
| C17  | C59  | 1.545(14) |
| C54  | C55  | 1.523(14) |
| C54  | C56  | 1.548(16) |
| C57  | C58  | 1.534(14) |
| C59  | C60  | 1.507(13) |
| C59  | C61  | 1.529(14) |
| C62  | C63  | 1.517(16) |
| C64  | C65  | 1.557(13) |
| C66  | C67  | 1.470(13) |
| C68  | C69  | 1.504(14) |
| C68  | C70  | 1.540(14) |

| Atom  | Atom  | Length/Å   |
|-------|-------|------------|
| C68   | C71   | 1.499(14)  |
| C72   | C73   | 1.529(14)  |
| C72   | C74   | 1.534(13)  |
| C72   | C75   | 1.523(12)  |
| C76   | C77   | 1.543(14)  |
| C78   | C79   | 1.529(12)  |
| C80   | C81   | 1.526(13)  |
| C82   | C83   | 1.547(13)  |
| C82   | C84   | 1.536(11)  |
| C82   | C85   | 1.518(12)  |
| C86   | C87   | 1.542(13)  |
| C86   | C88   | 1.550(12)  |
| C86   | C89   | 1.598(14)  |
| C90   | C91   | 1.507(12)  |
| C92   | C93   | 1.511(13)  |
| C94   | C95   | 1.500(14)  |
| C94   | C96   | 1.536(14)  |
| C94   | C97   | 1.555(14)  |
| C98   | C111  | 1.465(13)  |
| C99   | C100  | 1.543(12)  |
| C101  | C102  | 1.511(15)  |
| C103  | C104  | 1.480(13)  |
| C103  | C105  | 1.554(12)  |
| C103  | C106  | 1.567(12)  |
| K1    | O1S_4 | 2.811(5)   |
| K2    | O1S_1 | 2.937(9)   |
| O1S_1 | C2S_1 | 1.4213(12) |
| O1S_1 | C4S_1 | 1.4210(12) |
| C2S_1 | C3S_1 | 1.5206(13) |
| C4S_1 | C5S_1 | 1.5197(13) |
| O1S_2 | C2S_2 | 1.4199(12) |
| O1S_2 | C4S_2 | 1.4199(12) |
| C2S_2 | C3S_2 | 1.5206(12) |
| C4S_2 | C5S_2 | 1.5205(12) |
| O1S_3 | C2S_3 | 1.4201(12) |
| O1S_3 | C4S_3 | 1.4204(12) |
| C2S_3 | C3S_3 | 1.5195(12) |
| C4S_3 | C5S_3 | 1.5198(12) |
| O1S_4 | C2S_4 | 1.4202(12) |
| O1S_4 | C4S_4 | 1.4207(12) |
| C2S_4 | C3S_4 | 1.5198(12) |
| C4S_4 | C5S_4 | 1.5197(12) |

**Table S6.** Bond Angles in ° for **1-Nd(NP\*)**.

| Atom | Atom | Atom | Angle/°    |
|------|------|------|------------|
| N2   | Nd1  | N1   | 95.2(2)    |
| N8   | Nd1  | N1   | 115.2(3)   |
| N8   | Nd1  | N2   | 110.1(4)   |
| N8   | Nd1  | N10  | 109.27(19) |
| N10  | Nd1  | N1   | 110.4(3)   |
| N10  | Nd1  | N2   | 116.1(3)   |
| N1   | P1   | N3   | 113.7(5)   |

| Atom | Atom | Atom | Angle <sup>°</sup> |
|------|------|------|--------------------|
| N1   | P1   | N4   | 121.4(5)           |
| N1   | P1   | N5   | 114.7(4)           |
| N1   | P1   | K1   | 53.8(3)            |
| N3   | P1   | N4   | 103.5(4)           |
| N3   | P1   | N5   | 110.1(4)           |
| N3   | P1   | K1   | 156.5(3)           |
| N4   | P1   | N5   | 91.0(4)            |
| N4   | P1   | K1   | 99.9(3)            |
| N5   | P1   | K1   | 66.7(2)            |
| N2   | P2   | N6   | 121.1(4)           |
| N2   | P2   | N7   | 118.5(5)           |
| N2   | P2   | N12  | 113.8(4)           |
| N2   | P2   | K1   | 47.8(3)            |
| N6   | P2   | K1   | 88.2(2)            |
| N7   | P2   | N6   | 91.2(3)            |
| N7   | P2   | K1   | 88.3(3)            |
| N12  | P2   | N6   | 102.8(4)           |
| N12  | P2   | N7   | 106.4(4)           |
| N12  | P2   | K1   | 161.3(3)           |
| N8   | P3   | N9   | 120.5(5)           |
| N8   | P3   | N30  | 121.7(5)           |
| N8   | P3   | N35  | 112.5(5)           |
| N9   | P3   | N30  | 91.4(4)            |
| N35  | P3   | N9   | 104.9(4)           |
| N35  | P3   | N30  | 102.5(4)           |
| N10  | P4   | N11  | 120.8(5)           |
| N10  | P4   | N46  | 120.4(5)           |
| N10  | P4   | N51  | 114.0(5)           |
| N11  | P4   | N46  | 89.8(4)            |
| N11  | P4   | N51  | 105.3(4)           |
| N51  | P4   | N46  | 102.7(4)           |
| Nd1  | N1   | K1   | 93.4(3)            |
| P1   | N1   | Nd1  | 166.7(5)           |
| P1   | N1   | K1   | 99.8(4)            |
| Nd1  | N2   | K1   | 93.7(3)            |
| P2   | N2   | Nd1  | 158.2(5)           |
| P2   | N2   | K1   | 107.5(4)           |
| C13  | N3   | P1   | 121.8(6)           |
| C3   | N3   | P1   | 121.0(7)           |
| C3   | N3   | C13  | 117.2(8)           |
| C1   | N4   | P1   | 112.3(6)           |
| C1   | N4   | C8   | 116.8(8)           |
| C8   | N4   | P1   | 122.9(6)           |
| P1   | N5   | K1   | 82.5(3)            |
| C2   | N5   | P1   | 111.1(6)           |
| C2   | N5   | C121 | 116.7(7)           |
| C2   | N5   | K1   | 112.5(6)           |
| C121 | N5   | P1   | 123.9(6)           |
| C121 | N5   | K1   | 103.9(5)           |
| C18  | N6   | P2   | 111.1(5)           |
| C18  | N6   | C23  | 115.5(6)           |
| C23  | N6   | P2   | 123.8(5)           |
| C19  | N7   | P2   | 114.9(5)           |
| C19  | N7   | C20  | 118.1(6)           |

| Atom | Atom | Atom | Angle <sup>o</sup> |
|------|------|------|--------------------|
| C20  | N7   | P2   | 127.0(5)           |
| P3   | N8   | Nd1  | 166.3(6)           |
| C27  | N9   | P3   | 126.9(7)           |
| C27  | N9   | C28  | 120.2(7)           |
| C28  | N9   | P3   | 112.3(6)           |
| P4   | N10  | Nd1  | 172.5(6)           |
| C41  | N11  | P4   | 126.5(6)           |
| C44  | N11  | P4   | 114.7(6)           |
| C44  | N11  | C41  | 118.5(8)           |
| C4   | N12  | P2   | 122.7(7)           |
| C4   | N12  | C113 | 115.8(7)           |
| C113 | N12  | P2   | 121.4(5)           |
| N4   | C1   | C2   | 106.9(8)           |
| N5   | C2   | C1   | 105.9(7)           |
| N12  | C4   | C114 | 114.9(8)           |
| N4   | C8   | C9   | 110.6(7)           |
| N4   | C8   | C10  | 109.9(7)           |
| N4   | C8   | C11  | 109.0(7)           |
| C10  | C8   | C9   | 109.1(7)           |
| C11  | C8   | C9   | 110.2(8)           |
| C11  | C8   | C10  | 108.0(7)           |
| N3   | C13  | C14  | 113.0(7)           |
| N3   | C3   | C16  | 115.9(9)           |
| N6   | C18  | C19  | 104.4(6)           |
| N7   | C19  | C18  | 104.3(6)           |
| N7   | C20  | C21  | 108.3(7)           |
| N7   | C20  | C22  | 111.2(7)           |
| N7   | C20  | C37  | 113.0(6)           |
| C22  | C20  | C21  | 109.4(7)           |
| C22  | C20  | C37  | 107.3(8)           |
| C37  | C20  | C21  | 107.6(7)           |
| N6   | C23  | C24  | 110.1(6)           |
| N6   | C23  | C25  | 108.6(7)           |
| N6   | C23  | C26  | 112.9(7)           |
| C24  | C23  | C26  | 108.9(7)           |
| C25  | C23  | C24  | 107.8(7)           |
| C25  | C23  | C26  | 108.4(7)           |
| C23  | C26  | K1   | 112.1(5)           |
| N9   | C27  | C109 | 110.1(8)           |
| N9   | C27  | C119 | 108.9(8)           |
| N9   | C27  | C120 | 110.7(8)           |
| C109 | C27  | C119 | 109.5(9)           |
| C109 | C27  | C120 | 108.4(8)           |
| C119 | C27  | C120 | 109.3(8)           |
| N9   | C28  | C29  | 107.4(7)           |
| N30  | C29  | C28  | 104.1(8)           |
| C29  | N30  | P3   | 109.7(6)           |
| C29  | N30  | C31  | 115.4(8)           |
| C31  | N30  | P3   | 121.4(6)           |
| N30  | C31  | C32  | 111.6(6)           |
| N30  | C31  | C33  | 108.6(7)           |
| N30  | C31  | C34  | 109.2(7)           |
| C33  | C31  | C32  | 109.4(7)           |
| C33  | C31  | C34  | 107.8(7)           |

| Atom | Atom | Atom | Angle <sup>o</sup> |
|------|------|------|--------------------|
| C34  | C31  | C32  | 110.1(7)           |
| C36  | N35  | P3   | 121.6(6)           |
| C36  | N35  | C39  | 115.0(8)           |
| C39  | N35  | P3   | 120.6(7)           |
| N35  | C36  | C38  | 116.0(8)           |
| N35  | C39  | C40  | 115.3(8)           |
| N11  | C41  | C12  | 108.4(6)           |
| N11  | C41  | C42  | 109.9(7)           |
| N11  | C41  | C43  | 109.9(7)           |
| C42  | C41  | C12  | 110.2(7)           |
| C42  | C41  | C43  | 109.3(6)           |
| C43  | C41  | C12  | 109.0(7)           |
| N11  | C44  | C45  | 105.3(8)           |
| N46  | C45  | C44  | 104.2(7)           |
| C45  | N46  | P4   | 110.0(6)           |
| C45  | N46  | C47  | 116.1(7)           |
| C47  | N46  | P4   | 122.0(6)           |
| N46  | C47  | C48  | 110.3(7)           |
| N46  | C47  | C49  | 108.3(7)           |
| N46  | C47  | C50  | 110.9(7)           |
| C48  | C47  | C49  | 107.6(7)           |
| C48  | C47  | C50  | 109.4(7)           |
| C50  | C47  | C49  | 110.2(7)           |
| C52  | N51  | P4   | 120.1(7)           |
| C53  | N51  | P4   | 122.0(6)           |
| C53  | N51  | C52  | 114.3(7)           |
| N51  | C52  | C115 | 115.8(7)           |
| N51  | C53  | C118 | 115.9(9)           |
| N12  | C113 | C112 | 113.2(7)           |
| N5   | C121 | C5   | 109.4(7)           |
| N5   | C121 | C6   | 114.4(7)           |
| N5   | C121 | C7   | 108.7(8)           |
| C6   | C121 | C5   | 110.2(8)           |
| C7   | C121 | C5   | 106.4(8)           |
| C7   | C121 | C6   | 107.5(8)           |
| N13  | Nd2  | N27  | 93.25(18)          |
| N19  | Nd2  | N13  | 112.9(3)           |
| N19  | Nd2  | N23  | 112.1(2)           |
| N19  | Nd2  | N27  | 112.5(4)           |
| N23  | Nd2  | N13  | 111.2(3)           |
| N23  | Nd2  | N27  | 113.7(3)           |
| N13  | P5   | N14  | 121.5(5)           |
| N13  | P5   | N16  | 114.9(5)           |
| N13  | P5   | N18  | 114.1(5)           |
| N13  | P5   | K2   | 54.9(4)            |
| N14  | P5   | N16  | 91.5(5)            |
| N14  | P5   | K2   | 95.8(3)            |
| N16  | P5   | K2   | 68.5(3)            |
| N18  | P5   | N14  | 103.3(4)           |
| N18  | P5   | N16  | 109.0(4)           |
| N18  | P5   | K2   | 160.8(3)           |
| N19  | P6   | N20  | 120.2(5)           |
| N19  | P6   | N21  | 120.8(4)           |
| N19  | P6   | N22  | 113.6(5)           |

| Atom | Atom | Atom | Angle <sup>o</sup> |
|------|------|------|--------------------|
| N20  | P6   | N21  | 91.3(4)            |
| N20  | P6   | N22  | 103.6(4)           |
| N22  | P6   | N21  | 103.8(5)           |
| N23  | P7   | N24  | 121.3(5)           |
| N23  | P7   | N25  | 121.3(5)           |
| N23  | P7   | N26  | 112.4(5)           |
| N25  | P7   | N24  | 90.8(4)            |
| N25  | P7   | N26  | 104.3(4)           |
| N26  | P7   | N24  | 103.4(4)           |
| N27  | P8   | N28  | 121.6(5)           |
| N27  | P8   | N29  | 113.2(5)           |
| N27  | P8   | N17  | 115.1(5)           |
| N27  | P8   | K2   | 54.9(4)            |
| N28  | P8   | N17  | 91.1(4)            |
| N28  | P8   | K2   | 97.1(3)            |
| N29  | P8   | N28  | 103.6(4)           |
| N29  | P8   | N17  | 109.7(4)           |
| N29  | P8   | K2   | 159.3(3)           |
| N17  | P8   | K2   | 67.8(2)            |
| Nd2  | N13  | K2   | 96.7(3)            |
| P5   | N13  | Nd2  | 165.1(6)           |
| P5   | N13  | K2   | 98.1(5)            |
| C54  | N14  | P5   | 126.1(7)           |
| C54  | N14  | C57  | 113.7(9)           |
| C57  | N14  | P5   | 114.4(7)           |
| P5   | N16  | K2   | 81.1(3)            |
| C58  | N16  | P5   | 111.2(7)           |
| C58  | N16  | C59  | 114.7(7)           |
| C58  | N16  | K2   | 119.7(6)           |
| C59  | N16  | P5   | 122.9(7)           |
| C59  | N16  | K2   | 103.2(5)           |
| C62  | N18  | P5   | 122.8(8)           |
| C64  | N18  | P5   | 122.7(6)           |
| C64  | N18  | C62  | 114.5(8)           |
| P6   | N19  | Nd2  | 170.7(5)           |
| C66  | N20  | P6   | 113.9(7)           |
| C66  | N20  | C72  | 118.5(8)           |
| C72  | N20  | P6   | 126.6(7)           |
| C67  | N21  | P6   | 108.9(7)           |
| C68  | N21  | P6   | 122.3(6)           |
| C68  | N21  | C67  | 116.9(7)           |
| C76  | N22  | P6   | 121.9(6)           |
| C78  | N22  | P6   | 121.2(7)           |
| C78  | N22  | C76  | 116.8(8)           |
| P7   | N23  | Nd2  | 173.4(6)           |
| C80  | N24  | P7   | 110.3(7)           |
| C80  | N24  | C86  | 113.8(7)           |
| C86  | N24  | P7   | 122.1(6)           |
| C81  | N25  | P7   | 115.4(7)           |
| C81  | N25  | C82  | 118.2(8)           |
| C82  | N25  | P7   | 126.3(6)           |
| C90  | N26  | P7   | 121.6(6)           |
| C92  | N26  | P7   | 121.0(6)           |
| C92  | N26  | C90  | 117.0(7)           |

| Atom | Atom | Atom | Angle <sup>o</sup> |
|------|------|------|--------------------|
| Nd2  | N27  | K2   | 95.4(3)            |
| P8   | N27  | Nd2  | 165.6(6)           |
| P8   | N27  | K2   | 98.9(5)            |
| C94  | N28  | P8   | 124.1(7)           |
| C98  | N28  | P8   | 112.2(7)           |
| C98  | N28  | C94  | 118.2(8)           |
| C99  | N29  | P8   | 120.4(6)           |
| C99  | N29  | C101 | 117.1(8)           |
| C101 | N29  | P8   | 122.5(7)           |
| P8   | N17  | K2   | 81.6(3)            |
| C103 | N17  | P8   | 125.4(6)           |
| C103 | N17  | K2   | 100.5(5)           |
| C111 | N17  | P8   | 110.7(6)           |
| C111 | N17  | C103 | 115.6(8)           |
| C111 | N17  | K2   | 117.6(5)           |
| N14  | C54  | C15  | 109.6(9)           |
| N14  | C54  | C55  | 109.5(8)           |
| N14  | C54  | C56  | 109.9(9)           |
| C15  | C54  | C56  | 106.0(9)           |
| C55  | C54  | C15  | 110.1(9)           |
| C55  | C54  | C56  | 111.8(10)          |
| N14  | C57  | C58  | 105.0(9)           |
| N16  | C58  | C57  | 104.6(8)           |
| N16  | C59  | C17  | 111.4(8)           |
| N16  | C59  | C61  | 105.6(9)           |
| C60  | C59  | N16  | 112.2(8)           |
| C60  | C59  | C17  | 108.8(10)          |
| C60  | C59  | C61  | 110.7(8)           |
| C61  | C59  | C17  | 108.0(8)           |
| N18  | C62  | C63  | 112.9(9)           |
| N18  | C64  | C65  | 111.8(9)           |
| N20  | C66  | C67  | 108.1(8)           |
| C66  | C67  | N21  | 106.2(7)           |
| N21  | C68  | C69  | 114.1(9)           |
| N21  | C68  | C70  | 108.7(8)           |
| N21  | C68  | C71  | 110.3(8)           |
| C69  | C68  | C70  | 107.9(8)           |
| C71  | C68  | C69  | 107.5(9)           |
| C71  | C68  | C70  | 108.2(9)           |
| N20  | C72  | C73  | 109.0(7)           |
| N20  | C72  | C74  | 109.0(8)           |
| N20  | C72  | C75  | 110.4(8)           |
| C73  | C72  | C74  | 110.6(8)           |
| C75  | C72  | C73  | 110.2(9)           |
| C75  | C72  | C74  | 107.5(7)           |
| N22  | C76  | C77  | 114.9(8)           |
| N22  | C78  | C79  | 113.9(8)           |
| N24  | C80  | C81  | 105.3(7)           |
| N25  | C81  | C80  | 105.2(8)           |
| N25  | C82  | C83  | 109.3(7)           |
| N25  | C82  | C84  | 111.2(7)           |
| N25  | C82  | C85  | 112.1(7)           |
| C84  | C82  | C83  | 108.5(8)           |
| C85  | C82  | C83  | 108.0(7)           |



| Atom  | Atom | Atom  | Angle <sup>°</sup> |
|-------|------|-------|--------------------|
| C85   | C82  | C84   | 107.7(7)           |
| N24   | C86  | C87   | 108.8(7)           |
| N24   | C86  | C88   | 112.0(8)           |
| N24   | C86  | C89   | 107.6(7)           |
| C87   | C86  | C88   | 111.1(8)           |
| C87   | C86  | C89   | 107.8(8)           |
| C88   | C86  | C89   | 109.4(8)           |
| N26   | C90  | C91   | 112.5(8)           |
| N26   | C92  | C93   | 116.0(8)           |
| N28   | C94  | C95   | 113.9(9)           |
| N28   | C94  | C96   | 111.5(8)           |
| N28   | C94  | C97   | 107.0(8)           |
| C95   | C94  | C96   | 111.1(9)           |
| C95   | C94  | C97   | 108.5(8)           |
| C96   | C94  | C97   | 104.2(9)           |
| N28   | C98  | C111  | 108.2(8)           |
| N29   | C99  | C100  | 114.5(9)           |
| N29   | C101 | C102  | 114.8(10)          |
| N17   | C103 | C105  | 111.7(7)           |
| N17   | C103 | C106  | 109.9(7)           |
| C104  | C103 | N17   | 111.4(8)           |
| C104  | C103 | C105  | 108.9(8)           |
| C104  | C103 | C106  | 109.0(8)           |
| C105  | C103 | C106  | 105.8(8)           |
| N17   | C111 | C98   | 105.6(8)           |
| P1    | K1   | Nd1   | 65.28(6)           |
| P1    | K1   | P2    | 128.49(6)          |
| P1    | K1   | C26   | 116.61(19)         |
| P2    | K1   | Nd1   | 63.33(6)           |
| N1    | K1   | Nd1   | 38.87(19)          |
| N1    | K1   | P1    | 26.4(2)            |
| N1    | K1   | P2    | 102.2(2)           |
| N1    | K1   | N5    | 55.3(2)            |
| N1    | K1   | C26   | 107.7(3)           |
| N1    | K1   | O1S_4 | 143.7(3)           |
| N2    | K1   | Nd1   | 38.72(18)          |
| N2    | K1   | P1    | 103.81(18)         |
| N2    | K1   | P2    | 24.68(18)          |
| N2    | K1   | N1    | 77.50(16)          |
| N2    | K1   | N5    | 131.4(2)           |
| N2    | K1   | C26   | 66.7(3)            |
| N2    | K1   | O1S_4 | 136.5(3)           |
| N5    | K1   | Nd1   | 93.10(15)          |
| N5    | K1   | P1    | 30.76(14)          |
| N5    | K1   | P2    | 154.61(16)         |
| N5    | K1   | C26   | 134.0(2)           |
| C26   | K1   | Nd1   | 88.31(16)          |
| C26   | K1   | P2    | 59.06(17)          |
| O1S_4 | K1   | Nd1   | 170.92(19)         |
| O1S_4 | K1   | P1    | 117.68(19)         |
| O1S_4 | K1   | P2    | 112.59(19)         |
| O1S_4 | K1   | N5    | 92.1(2)            |
| O1S_4 | K1   | C26   | 82.7(2)            |
| P5    | K2   | Nd2   | 63.87(6)           |

| Atom  | Atom  | Atom  | Angle/°    |
|-------|-------|-------|------------|
| P5    | K2    | P8    | 127.70(5)  |
| P8    | K2    | Nd2   | 63.83(6)   |
| N13   | K2    | Nd2   | 36.95(19)  |
| N13   | K2    | P5    | 26.9(2)    |
| N13   | K2    | P8    | 100.8(2)   |
| N13   | K2    | N16   | 54.6(3)    |
| N13   | K2    | N27   | 74.64(15)  |
| N13   | K2    | N17   | 126.3(3)   |
| N13   | K2    | O1S_1 | 138.6(3)   |
| N16   | K2    | Nd2   | 89.84(18)  |
| N16   | K2    | P5    | 30.41(17)  |
| N16   | K2    | P8    | 149.1(2)   |
| N16   | K2    | N17   | 178.1(3)   |
| N27   | K2    | Nd2   | 37.7(2)    |
| N27   | K2    | P5    | 101.6(2)   |
| N27   | K2    | P8    | 26.2(2)    |
| N27   | K2    | N16   | 125.9(3)   |
| N27   | K2    | N17   | 54.3(3)    |
| N27   | K2    | O1S_1 | 145.4(3)   |
| N17   | K2    | Nd2   | 90.70(17)  |
| N17   | K2    | P5    | 150.93(18) |
| N17   | K2    | P8    | 30.52(16)  |
| O1S_1 | K2    | Nd2   | 171.6(2)   |
| O1S_1 | K2    | P5    | 112.1(2)   |
| O1S_1 | K2    | P8    | 119.8(2)   |
| O1S_1 | K2    | N16   | 88.6(3)    |
| O1S_1 | K2    | N17   | 91.1(3)    |
| C2S_1 | O1S_1 | K2    | 125.9(4)   |
| C4S_1 | O1S_1 | K2    | 105.8(7)   |
| C4S_1 | O1S_1 | C2S_1 | 113.0(2)   |
| O1S_1 | C2S_1 | C3S_1 | 108.65(19) |
| O1S_1 | C4S_1 | C5S_1 | 108.88(19) |
| C4S_2 | O1S_2 | C2S_2 | 113.5(2)   |
| O1S_2 | C2S_2 | C3S_2 | 108.76(18) |
| O1S_2 | C4S_2 | C5S_2 | 108.71(19) |
| C2S_3 | O1S_3 | C4S_3 | 113.4(2)   |
| O1S_3 | C2S_3 | C3S_3 | 108.86(19) |
| O1S_3 | C4S_3 | C5S_3 | 108.89(19) |
| C2S_4 | O1S_4 | K1    | 133.5(4)   |
| C2S_4 | O1S_4 | C4S_4 | 113.3(2)   |
| C4S_4 | O1S_4 | K1    | 110.1(3)   |
| O1S_4 | C2S_4 | C3S_4 | 108.88(18) |
| O1S_4 | C4S_4 | C5S_4 | 108.93(18) |

**Table S7.** Bond Lengths in Å for **1-Dy(NP\*)**.

| Atom | Atom | Length/Å |
|------|------|----------|
| C1   | C2   | 1.505(4) |
| C1   | N2   | 1.451(3) |
| C2   | N3   | 1.446(3) |
| C3   | C4   | 1.531(4) |
| C3   | C5   | 1.519(3) |
| C3   | C6   | 1.542(4) |

| Atom | Atom            | Length/Å   |
|------|-----------------|------------|
| C3   | N2              | 1.479(3)   |
| C7   | C8              | 1.524(4)   |
| C7   | C9              | 1.519(4)   |
| C7   | C10             | 1.550(4)   |
| C7   | N3              | 1.480(3)   |
| C11  | C12             | 1.520(4)   |
| C11  | N4              | 1.459(3)   |
| C13  | C14             | 1.542(6)   |
| C13  | N4              | 1.455(3)   |
| C15  | C16             | 1.518(4)   |
| C15  | N6              | 1.447(3)   |
| C16  | N7              | 1.462(3)   |
| C17  | C19             | 1.544(4)   |
| C17  | N6              | 1.468(3)   |
| C17  | C18             | 1.527(4)   |
| C17  | C20             | 1.519(4)   |
| C21  | C22             | 1.525(4)   |
| C21  | C23             | 1.546(4)   |
| C21  | C24             | 1.540(4)   |
| C21  | N7              | 1.481(3)   |
| C26  | C25             | 1.525(3)   |
| C27  | C28             | 1.531(4)   |
| C27  | N8              | 1.463(3)   |
| K1   | N1 <sup>1</sup> | 2.8060(19) |
| K1   | N1              | 2.8060(19) |
| K1   | N3 <sup>1</sup> | 3.162(2)   |
| K1   | O1              | 2.907(5)   |
| N1   | P1              | 1.5235(16) |
| N1   | Dy1             | 2.2597(15) |
| N2   | P1              | 1.708(2)   |
| N3   | P1              | 1.7215(18) |
| N4   | P1              | 1.6789(19) |
| N5   | P2              | 1.5259(16) |
| N5   | Dy1             | 2.2214(15) |
| N6   | P2              | 1.6922(18) |
| N7   | P2              | 1.7127(17) |
| N8   | P2              | 1.6842(17) |
| N8   | C25             | 1.446(3)   |
| C30  | C29             | 1.519(2)   |
| C29  | O1              | 1.442(8)   |
| C31  | C32             | 1.491(8)   |
| C31  | O1              | 1.436(7)   |

**Table S8.** Bond Angles in ° for **1-Dy(NP\*)**.

| Atom | Atom | Atom | Angle/°    |
|------|------|------|------------|
| N2   | C1   | C2   | 106.5(2)   |
| N3   | C2   | C1   | 105.29(19) |
| C4   | C3   | C6   | 109.4(3)   |

| Atom            | Atom | Atom            | Angle <sup>o</sup> |
|-----------------|------|-----------------|--------------------|
| C5              | C3   | C4              | 108.9(2)           |
| C5              | C3   | C6              | 108.4(2)           |
| N2              | C3   | C4              | 108.7(2)           |
| N2              | C3   | C5              | 111.0(2)           |
| N2              | C3   | C6              | 110.5(2)           |
| C8              | C7   | C10             | 105.1(3)           |
| C9              | C7   | C8              | 110.4(3)           |
| C9              | C7   | C10             | 107.9(2)           |
| N3              | C7   | C8              | 111.6(2)           |
| N3              | C7   | C9              | 112.6(2)           |
| N3              | C7   | C10             | 108.9(3)           |
| N4              | C11  | C12             | 114.7(2)           |
| N4              | C13  | C14             | 114.3(3)           |
| N6              | C15  | C16             | 105.72(19)         |
| N7              | C16  | C15             | 104.26(18)         |
| N6              | C17  | C19             | 109.9(2)           |
| N6              | C17  | C18             | 109.0(2)           |
| N6              | C17  | C20             | 111.03(18)         |
| C18             | C17  | C19             | 108.9(2)           |
| C20             | C17  | C19             | 108.4(2)           |
| C20             | C17  | C18             | 109.5(2)           |
| C22             | C21  | C23             | 108.6(3)           |
| C22             | C21  | C24             | 108.6(2)           |
| C24             | C21  | C23             | 110.3(2)           |
| N7              | C21  | C22             | 109.94(18)         |
| N7              | C21  | C23             | 107.88(19)         |
| N7              | C21  | C24             | 111.5(2)           |
| N8              | C27  | C28             | 114.4(2)           |
| N1 <sup>1</sup> | K1   | N1              | 72.98(6)           |
| N1              | K1   | N3 <sup>1</sup> | 122.99(5)          |
| N1 <sup>1</sup> | K1   | N3 <sup>1</sup> | 54.34(5)           |
| N1              | K1   | O1              | 146.6(2)           |
| N1 <sup>1</sup> | K1   | O1              | 139.51(18)         |
| O1              | K1   | N3 <sup>1</sup> | 89.9(2)            |
| P1              | N1   | K1              | 96.39(8)           |
| P1              | N1   | Dy1             | 167.66(11)         |
| Dy1             | N1   | K1              | 95.91(6)           |
| C1              | N2   | C3              | 116.1(2)           |
| C1              | N2   | P1              | 113.14(17)         |
| C3              | N2   | P1              | 123.16(14)         |
| C2              | N3   | C7              | 115.75(19)         |
| C2              | N3   | K1              | 111.52(16)         |
| C2              | N3   | P1              | 111.95(17)         |
| C7              | N3   | K1              | 105.72(13)         |
| C7              | N3   | P1              | 124.66(17)         |
| P1              | N3   | K1              | 80.40(7)           |
| C11             | N4   | P1              | 122.95(16)         |
| C13             | N4   | C11             | 114.6(2)           |
| C13             | N4   | P1              | 122.34(16)         |
| P2              | N5   | Dy1             | 168.31(11)         |
| C15             | N6   | C17             | 117.26(18)         |
| C15             | N6   | P2              | 114.43(17)         |
| C17             | N6   | P2              | 128.23(15)         |
| C16             | N7   | C21             | 116.02(18)         |

| Atom            | Atom | Atom            | Angle <sup>o</sup> |
|-----------------|------|-----------------|--------------------|
| C16             | N7   | P2              | 109.59(16)         |
| C21             | N7   | P2              | 122.97(14)         |
| C27             | N8   | P2              | 120.31(15)         |
| C25             | N8   | C27             | 117.39(18)         |
| C25             | N8   | P2              | 122.21(14)         |
| N1              | P1   | N2              | 121.16(10)         |
| N1              | P1   | N3              | 115.30(10)         |
| N1              | P1   | N4              | 113.88(10)         |
| N2              | P1   | N3              | 91.06(10)          |
| N4              | P1   | N2              | 103.47(10)         |
| N4              | P1   | N3              | 109.30(10)         |
| N5              | P2   | N6              | 120.29(10)         |
| N5              | P2   | N7              | 121.46(9)          |
| N5              | P2   | N8              | 113.32(9)          |
| N6              | P2   | N7              | 90.79(9)           |
| N8              | P2   | N6              | 104.29(9)          |
| N8              | P2   | N7              | 103.14(9)          |
| N1 <sup>1</sup> | Dy1  | K1              | 47.60(5)           |
| N1              | Dy1  | K1              | 47.60(5)           |
| N1 <sup>1</sup> | Dy1  | N1              | 95.19(9)           |
| N5 <sup>1</sup> | Dy1  | K1              | 125.10(5)          |
| N5              | Dy1  | K1              | 125.10(5)          |
| N5 <sup>1</sup> | Dy1  | N1 <sup>1</sup> | 112.62(7)          |
| N5              | Dy1  | N1              | 112.61(7)          |
| N5              | Dy1  | N1 <sup>1</sup> | 113.02(6)          |
| N5 <sup>1</sup> | Dy1  | N1              | 113.02(6)          |
| N5 <sup>1</sup> | Dy1  | N5              | 109.80(9)          |
| N8              | C25  | C26             | 113.8(2)           |
| O1              | C29  | C30             | 109.2(7)           |
| O1              | C31  | C32             | 110.2(7)           |
| C29             | O1   | K1              | 111.2(4)           |
| C31             | O1   | K1              | 132.8(5)           |
| C31             | O1   | C29             | 111.2(5)           |

## Electrochemistry

Electrochemical measurements were performed on a Pine Wave Driver 20 Bipotentiostat/Galvanostat. Measurements were performed inside a N<sub>2</sub> atmosphere glovebox in a 20 mL electrochemical cell with a glassy carbon working electrode, a platinum wire counter electrode, and a Ag/AgCl pseudo reference electrode. Electrodes were polished before each use. Measurements were performed in a positive feedback IR compensation mode and referenced versus Fc/Fc<sup>+</sup>.

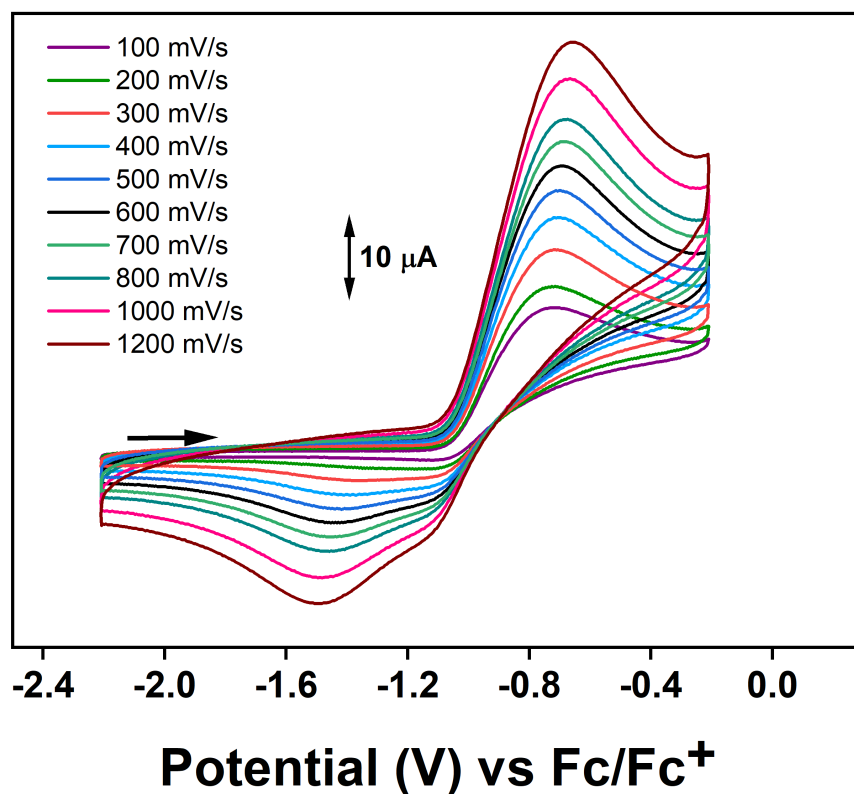

**Figure S23.** Scan rate dependence of 1-Pr(NP\*) (2.5 mM) vs. Fc/Fc<sup>+</sup> in 0.1 M [n-Bu<sub>4</sub>N][PF<sub>6</sub>] in THF.

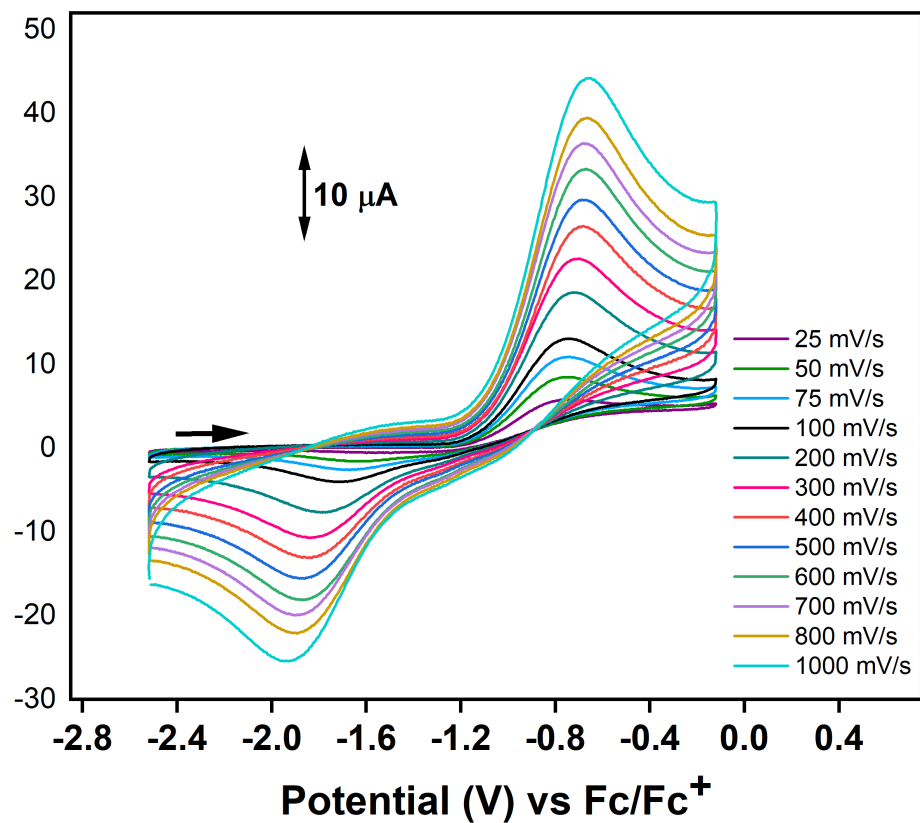

**Figure S24.** Scan rate dependence of 1-Tb(NP\*) (2.5 mM) vs. Fc/Fc<sup>+</sup> in 0.1 M [n(Bu)<sub>4</sub>N][PF<sub>6</sub>] in THF.

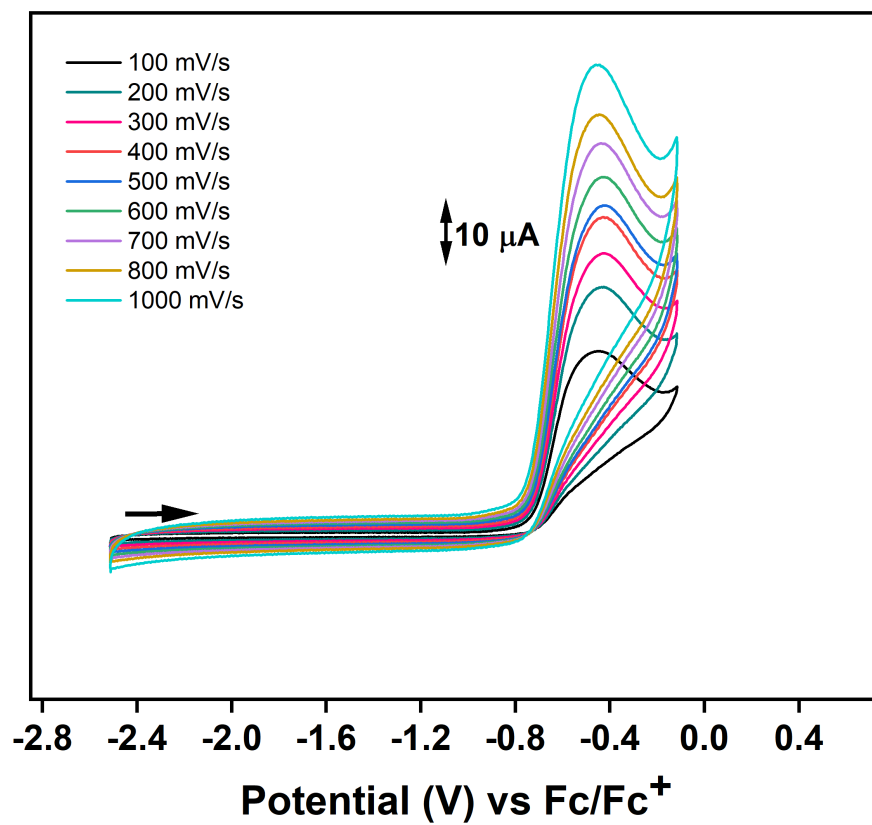

**Figure S25.** Scan rate dependence of **1-Nd(NP\*)** (2.5 mM) vs. Fc/Fc<sup>+</sup> in 0.1 M [n(Bu)<sub>4</sub>N][PF<sub>6</sub>] in THF.



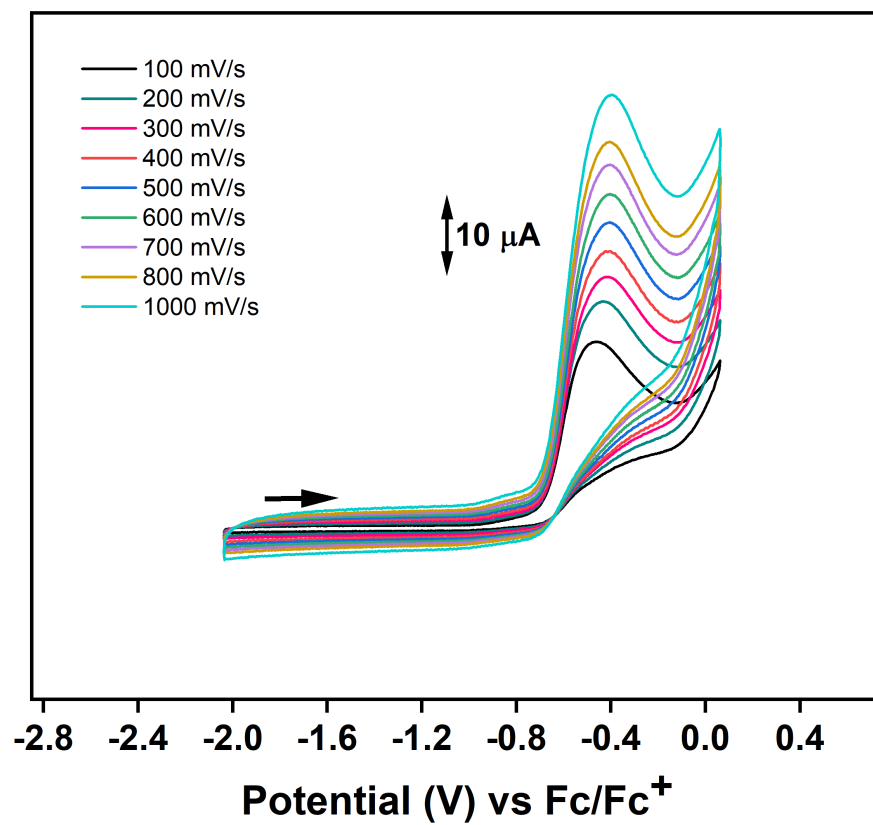

**Figure S26.** Scan rate dependence of **1-Dy(NP\*)** (2.5 mM) vs. Fc/Fc<sup>+</sup> in 0.1 M [n(Bu)<sub>4</sub>N][PF<sub>6</sub>] in THF.

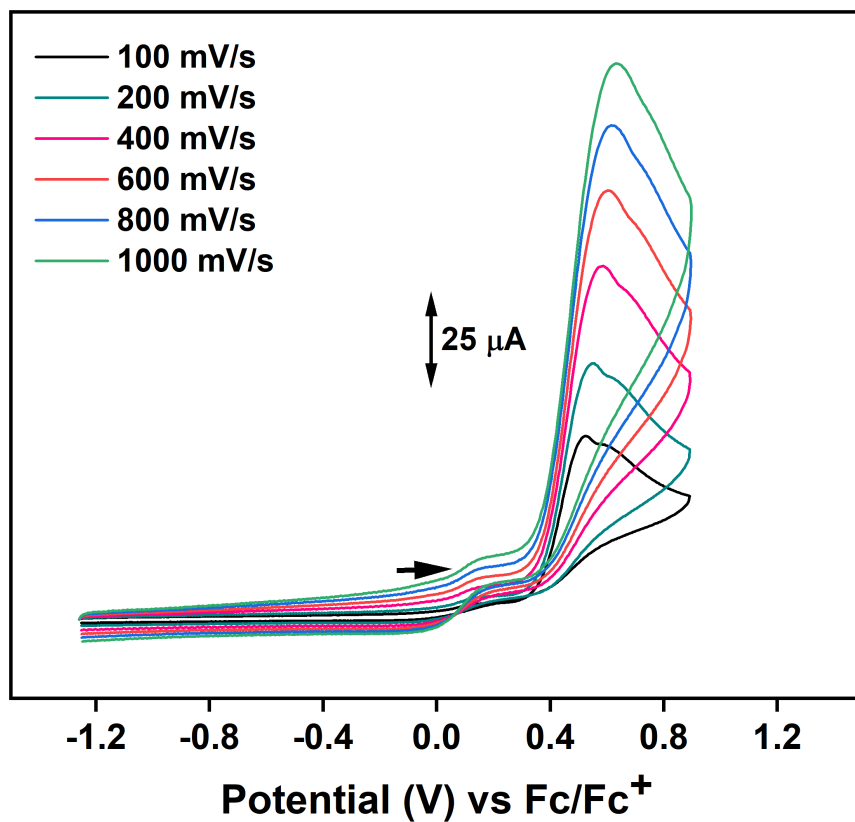

**Figure S27.** Scan rate dependence of [K][NP(1,2-*bis-t*Bu-diamidoethane)(NEt<sub>2</sub>)] (2.5 mM) vs. Fc/Fc<sup>+</sup> in 0.1 M [n(Bu)<sub>4</sub>N][PF<sub>6</sub>] in THF.

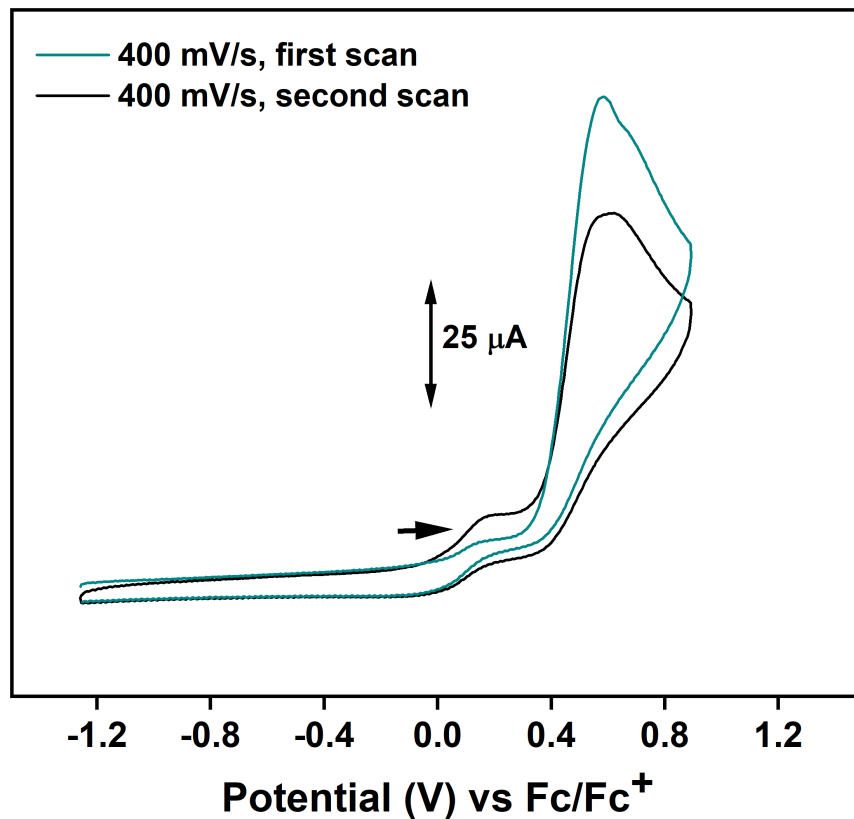

**Figure S28.** Difference between first and second scan of  $[K][(\text{NP}(1,2\text{-bis-}^t\text{Bu-diamidoethane})(\text{NEt}_2))] (2.5 \text{ mM})$  vs.  $\text{Fc}/\text{Fc}^+$  in  $0.1 \text{ M } [n(\text{Bu})_4\text{N}][\text{PF}_6]$  in THF. Note the decrease in intensity of the oxidation event and the in growth of a degradation feature on the second scan.

## EPR Spectroscopy

X-band EPR measurements were performed on a Bruker E680 spectrometer (Billerica, MA) with a Bruker high sensitivity resonator (ER 4119HS) and an Oxford ESR-900 helium flow cryostat at 9.5 GHz on frozen solutions of **1-Pr(NP\*)** and **2-Pr(NP\*)** in toluene at 5K, 10, and 20, and 30 K and at room temperature. The EPR signal was attenuated at 20 K and higher. EPR simulations used the program Easy Spin.<sup>9</sup>

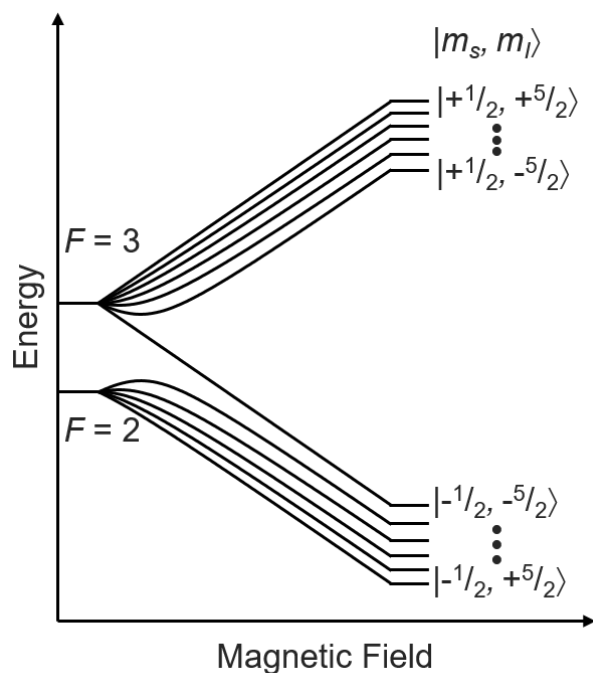

**Figure S29.** Pictorial representation of the energy levels for a system with  $S = \frac{1}{2}$  and  $I = \frac{5}{2}$ . At low magnetic fields the states are represented in the  $|F, m_F\rangle$  basis while at high fields the  $|S, I, m_S, m_I\rangle$  basis is used.

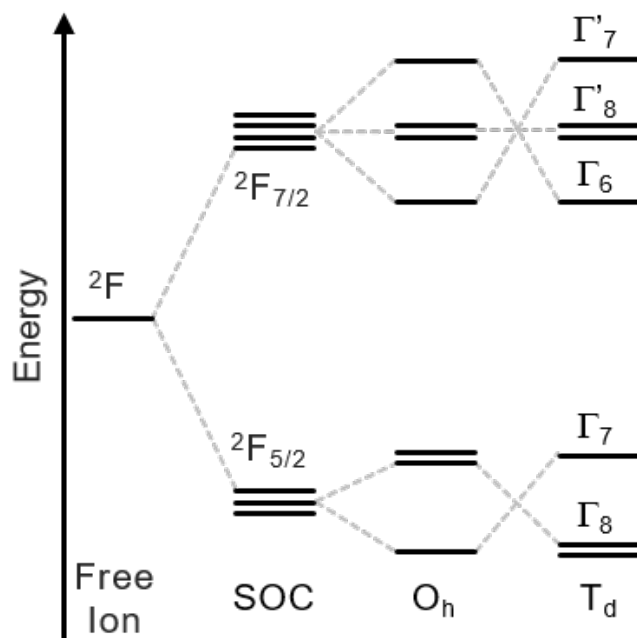

**Figure S30.** Representation of the energy levels in an  $f^1$  system starting with the free ion, then including spin-orbit coupling (SOC), and finally the crystal field (octahedral,  $O_h$  and tetrahedral,  $T_d$ ).

## Electronic Absorption Spectroscopy

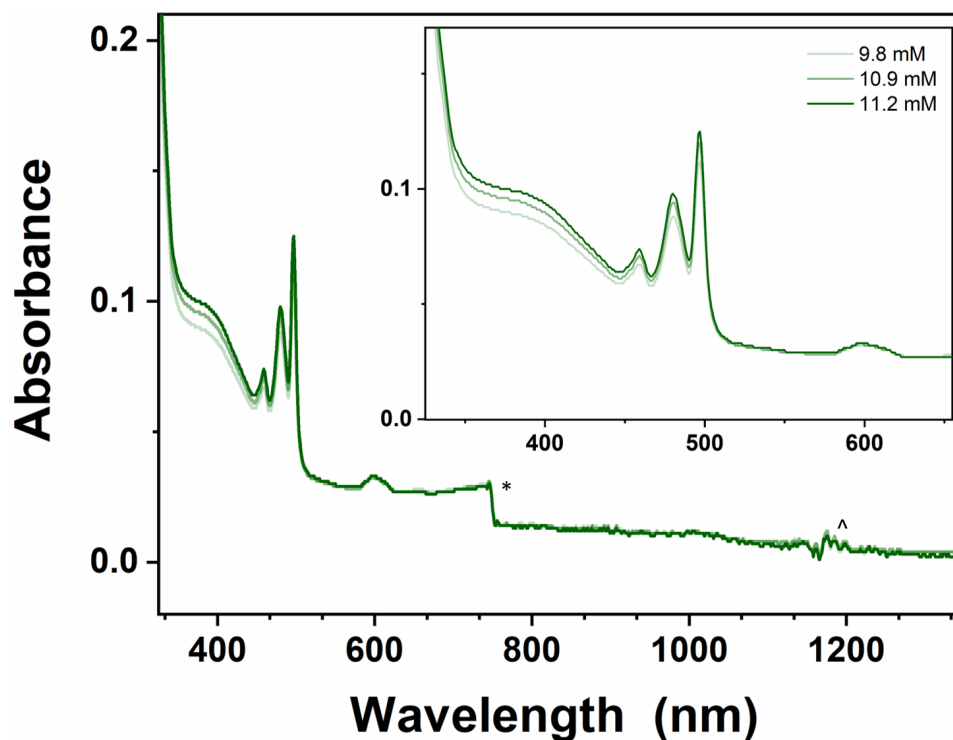

**S31.** Concentration dependent UV-vis-NIR spectra of **1-Pr(NP\*)** in THF. Artifact is noted by ^ and grating change is denoted by \*. Observable transitions and their molar absorptivities are reported in Table S9 below.

**Table S9.** Concentration, absorbance, and molar absorptivity values for observable transitions and transition assignments in concentrated samples of **1-Pr(NP\*)**. Absorption features were assigned according to their proximity to known transitions.<sup>10-11</sup> Absorbance values for transition at 598 nm ( $^3H_4 \rightarrow ^1D_2$ ) were too low to provide a reliable extinction coefficient value.

| Wavelength (nm) | Concentration (M) | Absorbance | Molar absorptivity ( $cm^{-1}M^{-1}$ ) | Transition Assignment     |
|-----------------|-------------------|------------|----------------------------------------|---------------------------|
| 497             | 9.84E-03          | 0.112      | $\epsilon = <10$                       | $^3H_4 \rightarrow 3P_0$  |
|                 | 1.09E-02          | 0.12       |                                        |                           |
|                 | 1.12E-02          | 0.125      |                                        |                           |
| 480             | 9.84E-03          | 0.088      | $\epsilon = <10$                       | $^3H_4 \rightarrow ^3P_1$ |
|                 | 1.09E-02          | 0.094      |                                        |                           |
|                 | 1.12E-02          | 0.098      |                                        |                           |
| 460             | 9.84E-03          | 0.067      | $\epsilon = <10$                       | $^3H_4 \rightarrow ^3P_2$ |
|                 | 1.09E-02          | 0.071      |                                        |                           |
|                 | 1.12E-02          | 0.074      |                                        |                           |

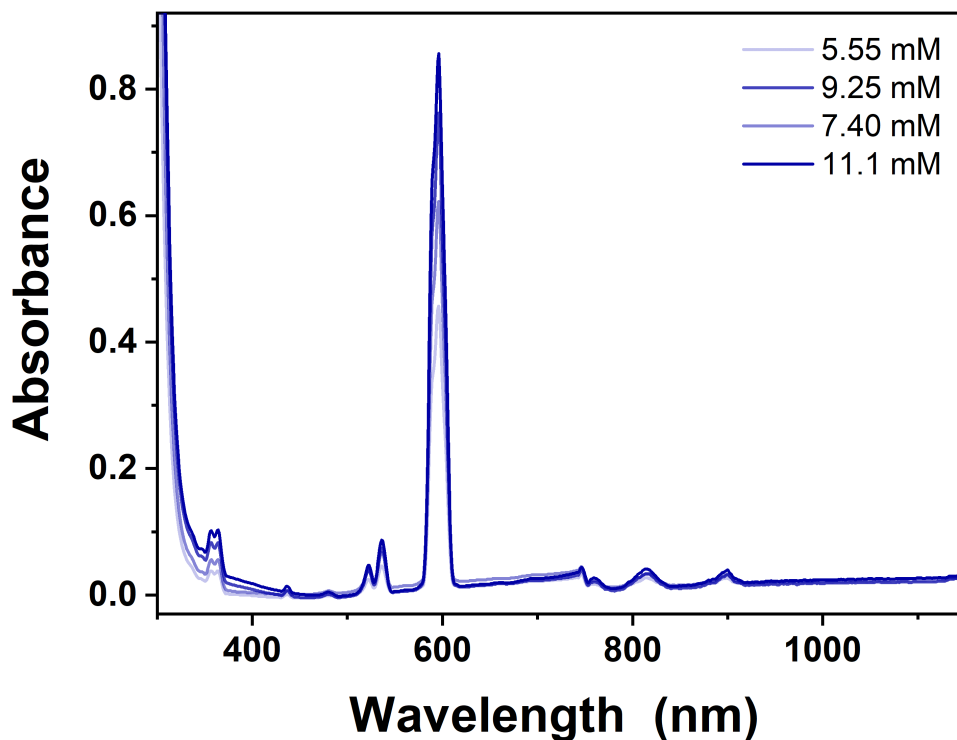

**Figure S32.** Concentration dependent UV-vis-NIR spectra of **1-Nd(NP\*)** in THF. Artifact is noted by ^ and grating change is denoted by \*. Absorption features were assigned according to their proximity to known transitions.<sup>10-12</sup> Observable transitions and their molar absorptivities are reported in Table S10 below.

**Table S10.** Concentration, absorbance, molar absorptivity values as available, and transition assignments for observable transitions in concentrated samples of **1-Nd(NP\*)**. Absorbance values for transitions at 900 ( $^4I_{9/2} \rightarrow ^4F_{3/2}$ ), 815 ( $^4I_{9/2} \rightarrow ^2H_{9/2} + ^4F_{5/2}$ ), 760 ( $^4I_{9/2} \rightarrow ^4S_{3/2} + ^4F_{7/2}$ ), 523 ( $^4I_{9/2} \rightarrow ^4G_{9/2} + ^2K_{13/2}$ ) and 480 ( $^4I_{9/2} \rightarrow ^2G_{9/2} + ^2D_{3/2}$ ) nm were too low to provide a reliable extinction coefficient value.

| Wavelength (nm) | Concentration (mM) | Absorbance | Molar Absorptivity ( $cm^{-1}M^{-1}$ ) | Transition Assignment                           |
|-----------------|--------------------|------------|----------------------------------------|-------------------------------------------------|
| 596             | 5.6E-03            | 0.457      | $\epsilon = 72$                        | $(^4I_{9/2} \rightarrow ^4G_{7/2} + ^4G_{5/2})$ |
|                 | 7.4E-03            | 0.622      |                                        |                                                 |
|                 | 9.3E-03            | 0.762      |                                        |                                                 |
|                 | 1.1E-02            | 0.856      |                                        |                                                 |
| 536             | 5.6E-03            | 0.046      | $\epsilon < 10$                        | $(^4I_{9/2} \rightarrow ^4G_{7/2})$             |
|                 | 7.4E-03            | 0.067      |                                        |                                                 |
|                 | 9.3E-03            | 0.074      |                                        |                                                 |
|                 | 1.1E-02            | 0.087      |                                        |                                                 |

|     |         |       |                                                                                            |
|-----|---------|-------|--------------------------------------------------------------------------------------------|
| 364 | 5.6E-03 | 0.038 | $\epsilon = 12$ ( $^4I_{9/2} \rightarrow ^2D_{1/2} + ^2D_{3/2} + ^2D_{5/2} + ^2I_{11/2}$ ) |
|     | 7.4E-03 | 0.056 |                                                                                            |
|     | 9.3E-03 | 0.083 |                                                                                            |
|     | 1.1E-02 | 0.102 |                                                                                            |
| 357 | 5.6E-03 | 0.038 | $\epsilon = 12$ coupled with 364 nm                                                        |
|     | 7.4E-03 | 0.056 |                                                                                            |
|     | 9.3E-03 | 0.083 |                                                                                            |
|     | 1.1E-02 | 0.102 |                                                                                            |

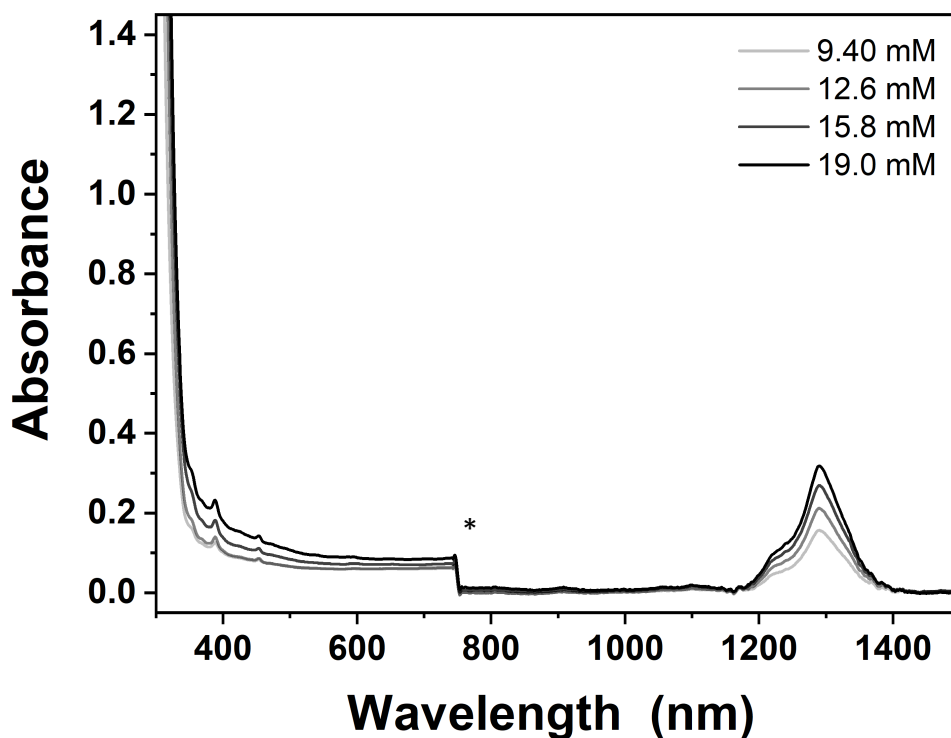

**S33.** Concentration dependent UV-vis-NIR spectra of **1-Dy(NP\*)** in THF. Grating change is denoted by \*. Absorption features were assigned according to their proximity to known transitions.<sup>11, 13-14</sup> Observable transitions and their molar absorptivities are reported in Table S11 below.



**Table S11.** Concentration, absorbance, and molar absorptivity values for observable transitions in concentrated samples of **1-Dy(NP\*)**. Absorbance values for transition at 453 ( ${}^6\text{H}_{11/2} \rightarrow {}^4\text{F}_{9/2}$ ) and 388 ( ${}^6\text{H}_{11/2} \rightarrow {}^4\text{I}_{15/2}$ ) nm were too low to provide a reliable extinction coefficient value.

| <i>Wavelength<br/>(nm)</i> | <i>Concentration<br/>(M)</i> | <i>Absorbance</i> | <i>Molar<br/>Absorptivity<br/>(<math>\text{cm}^{-1}\text{M}^{-1}</math>)</i> | <i>Transition<br/>Assignment</i>                        |
|----------------------------|------------------------------|-------------------|------------------------------------------------------------------------------|---------------------------------------------------------|
| 1290                       | 9.40E-03                     | 0.157             | $\epsilon = 17$                                                              | $({}^6\text{H}_{11/2} \rightarrow {}^6\text{F}_{11/2})$ |
|                            | 1.26E-03                     | 0.212             |                                                                              |                                                         |
|                            | 1.58E-03                     | 0.269             |                                                                              |                                                         |
|                            | 1.90E-02                     | 0.318             |                                                                              |                                                         |

## Density Functional Theory

All DFT calculations were carried out with the PBE0<sup>15</sup> hybrid functional as implemented in the Gaussian 16 software package revision B.01.<sup>16</sup> ECP28MWB<sup>17</sup> small core quasi-relativistic pseudopotential and ECP28MWB\_ANO<sup>18</sup> basis set were used to describe Ln atoms (Ln=Pr, Nd, Dy), and the remaining atoms were described with the all-electron Pople basis set 6-311G(d).<sup>19</sup> The geometrical structures of the trivalent complexes **1-Ln(NP\*)** were optimized excluding the K<sup>+</sup> counter ion. Since there are no XRD data for **2-Ln(NP\*)** (Pr, Nd, Dy), their initial structures for the geometry optimization were taken from the similar Ce<sup>4+</sup> and Tb<sup>4+</sup> complexes with the previously reported experimental crystal structures<sup>2,8</sup> All calculations for both **1-Ln(NP\*)** and **2-Ln(NP\*)** compounds were performed in gas phase without any constraints based on the XRD structures (if available). Harmonic frequency calculations were performed to confirm that the optimized structures were stationary points on the potential energy surface. The computed structural metrics of the **1-Ln(NP\*)** complexes are in good agreement with the XRD data, with Ln–N and N–P bond distances, as well as Ln–N–P and N–Ln–N valence angles deviating by less than 1.1%, 0.5%, 4.1%, and 0.3% of the experimental parameters, respectively, providing confidence to the theoretical model (Table S12). In accordance with Hund's rules, the highest spin states of **1-Ln(NP\*)** were considered for their electronic ground states: triplet for **1-Pr(NP\*)**, quartet for **1-Nd(NP\*)**, and sextet for **1-Dy(NP\*)**. For the metal-oxidized **2-Pr(NP\*)**, doublet spin state was considered. For the ligand-oxidized compounds, **2-Nd(NP\*)** and **2-Dy(NP\*)**, both high (quintet and septet, respectively) and low (triplet and quintet, respectively) spin states were considered to account for the ferromagnetic/antiferromagnetic spin coupling between Ln and ligands. In both **2-Nd(NP\*)** and **2-Dy(NP\*)**, the lower spin states were found to be slightly more stable than the high spin states, *i.e.* by 1.00 kcal/mol and 0.53 kcal/mol, respectively. Wave functions of all studied species are stable indicating that the calculations converged to the ground electronic state. Time-dependent DFT calculations (TD-DFT) of up to 200 excited states were carried out to simulate the UV-vis spectra. The computed spectra were plotted broadening the calculated excitation lines with Gaussian-type peaks using 0.1 eV half-width at half height. Natural transition orbitals (NTOs),<sup>20</sup> which most of the time can yield a single electron-hole representations of the electronic excitations, were employed to interpret the calculated excitation spectra. To gain more insight into electronic structure of these complexes, chemical bonding analyses were performed using Natural Bond Orbital<sup>21-22</sup> (NBO7) method. The IQMol<sup>23</sup> was used for molecular orbitals visualization of the NBO results. Chemission 4.60<sup>24</sup> was used to plot molecular orbital energy level diagrams.

**Table S12.** Experimental (exp) vs. theoretical (theor) bond lengths (Å) and valence angles (°) of complexes **1-Ln(NP\*)**, Ln=Pr, Nd, Dy.

| Bond/complex               | 1-Pr(NP*) | 1-Pr(NP*) | 1-Nd(NP*) | 1-Nd(NP*) | 1-Dy(NP*) | 1-Dy(NP*) |
|----------------------------|-----------|-----------|-----------|-----------|-----------|-----------|
|                            | exp       | theor     | exp       | theor     | exp       | theor     |
| avg. Ln–N                  | 2.324     | 2.332     | 2.313     | 2.318     | 2.241     | 2.217     |
| avg. N <sub>imido</sub> -P | 1.533(5)  | 1.535     | 1.535     | 1.535     | 1.525     | 1.533     |
| avg. Ln-N-P                | 166.5     | 173.29    | 167.35    | 172.78    | 168.00    | 171.84    |
| avg. N-Ln-N                | 109.2(2)  | 109.48    | 109.35    | 109.47    | 109.4     | 109.47    |

**Table S13.** Theoretical bond lengths (Å) and valence angles (°) of complexes **2-Ln(NP\*)**, Ln=Pr, Nd, Dy.

| Bond/complex                                                     | 2-Pr(NP*) | 2-Nd(NP*) | 2-Dy(NP*) |
|------------------------------------------------------------------|-----------|-----------|-----------|
| The longest Ln-N                                                 | 2.194     | 2.474     | 2.357     |
| Three shorter Ln-N, avg.                                         | 2.183     | 2.258     | 2.168     |
| avg. Ln–N                                                        | 2.185     | 2.312     | 2.215     |
| N <sub>imido</sub> -P (related to the longest Ln-N bond)         | 1.559     | 1.588     | 1.585     |
| avg. N <sub>imido</sub> -P (related to the 3 shorter Ln-N bonds) | 1.558     | 1.546     | 1.543     |
| avg. N <sub>imido</sub> -P                                       | 1.558     | 1.557     | 1.554     |
| avg. Ln-N-P                                                      | 169.13    | 169.64    | 170.97    |
| avg. N-Ln-N                                                      | 109.47    | 109.33    | 109.32    |

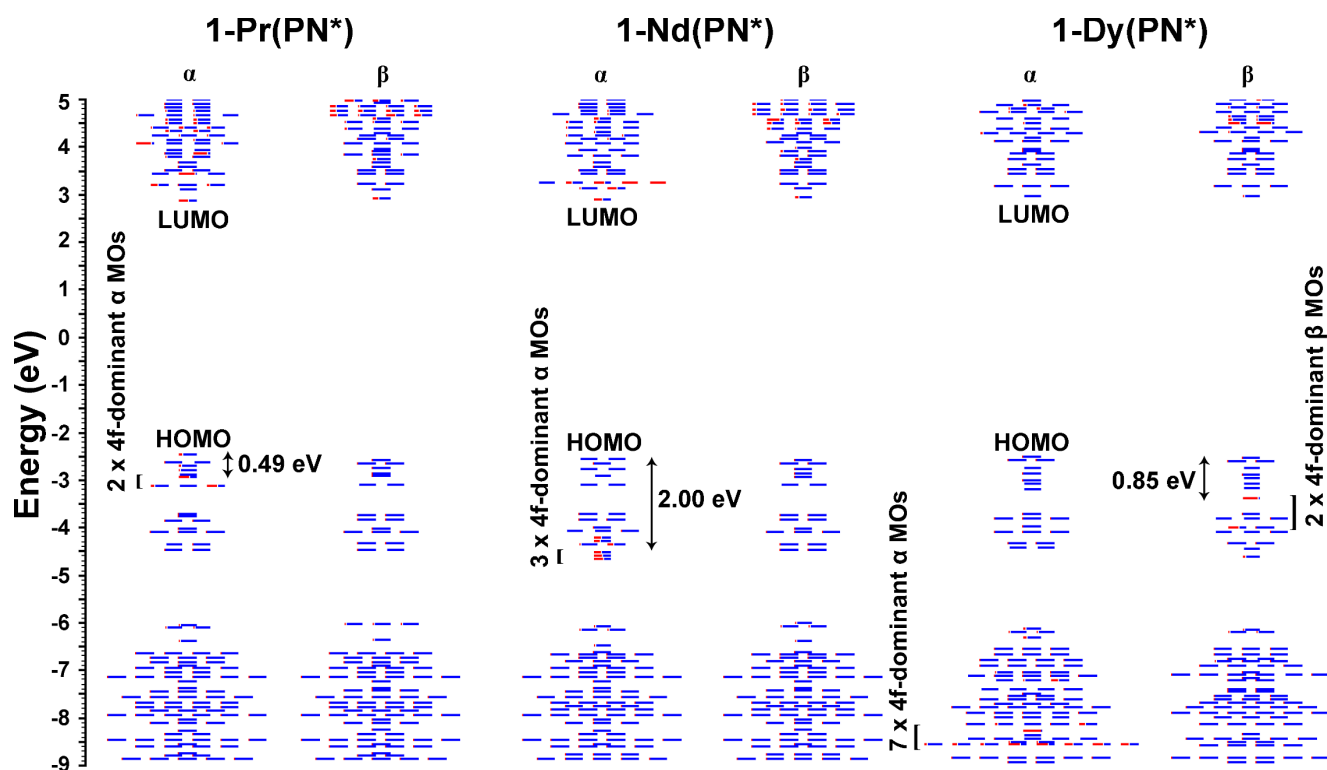

**Figure S34.** Combined ( $\alpha+\beta$ ) MO diagrams of **1-Ln(NP<sup>\*</sup>)**, Ln=Pr, Nd, Dy. The red fraction of the MO lines represents the percentage of Ln AOs in the MOs, and the blue lines are the ligand fraction. The arrows reflect the energy difference between HOMO and the highest 4f-dominant MO of Ln. Degeneracy of the MO energy levels is set to 0.05 eV.

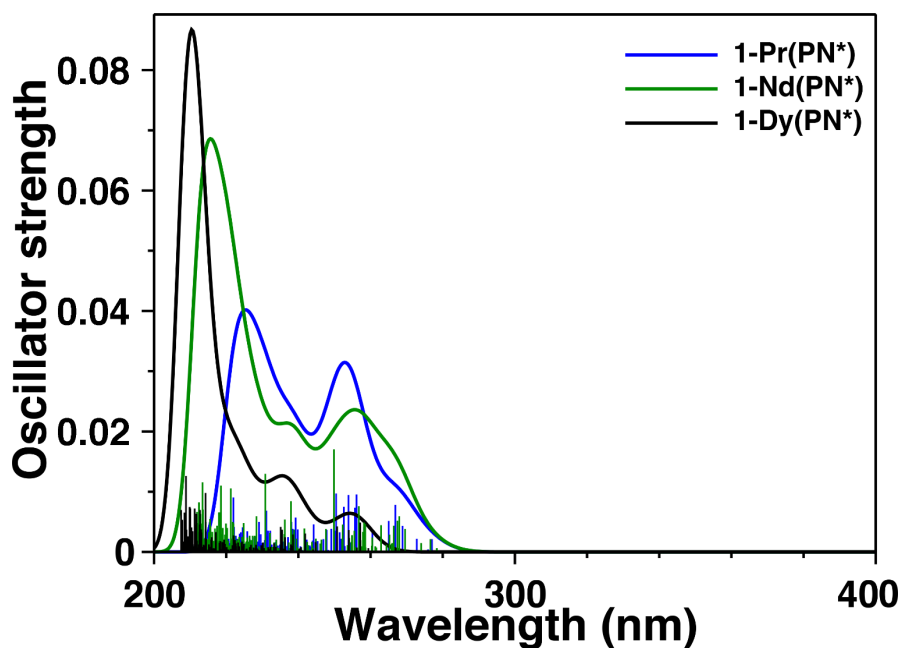

**Figure S35.** Computed TD-DFT spectra of **1-Ln(NP<sup>\*</sup>)**, Ln=Pr, Nd, Dy. Vertical bars depict theoretical oscillator strength of single-electron excitations.

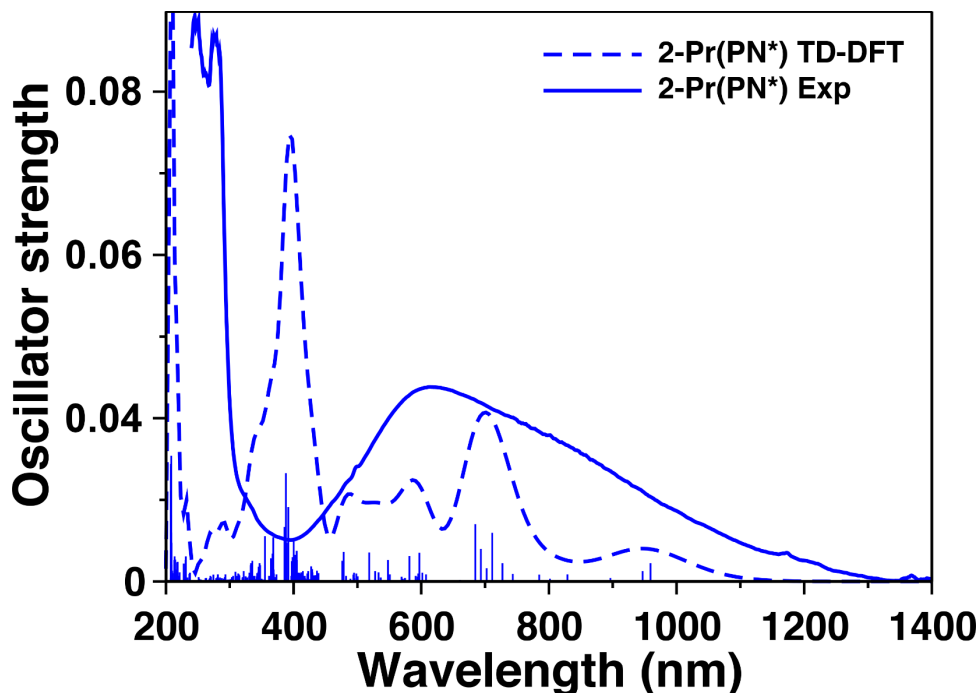

**Figure S36.** Experimental UV-Vis and computed TD-DFT spectra of **2-Pr(NP<sup>\*</sup>)**. Vertical bars depict theoretical oscillator strength of single-electron excitations.

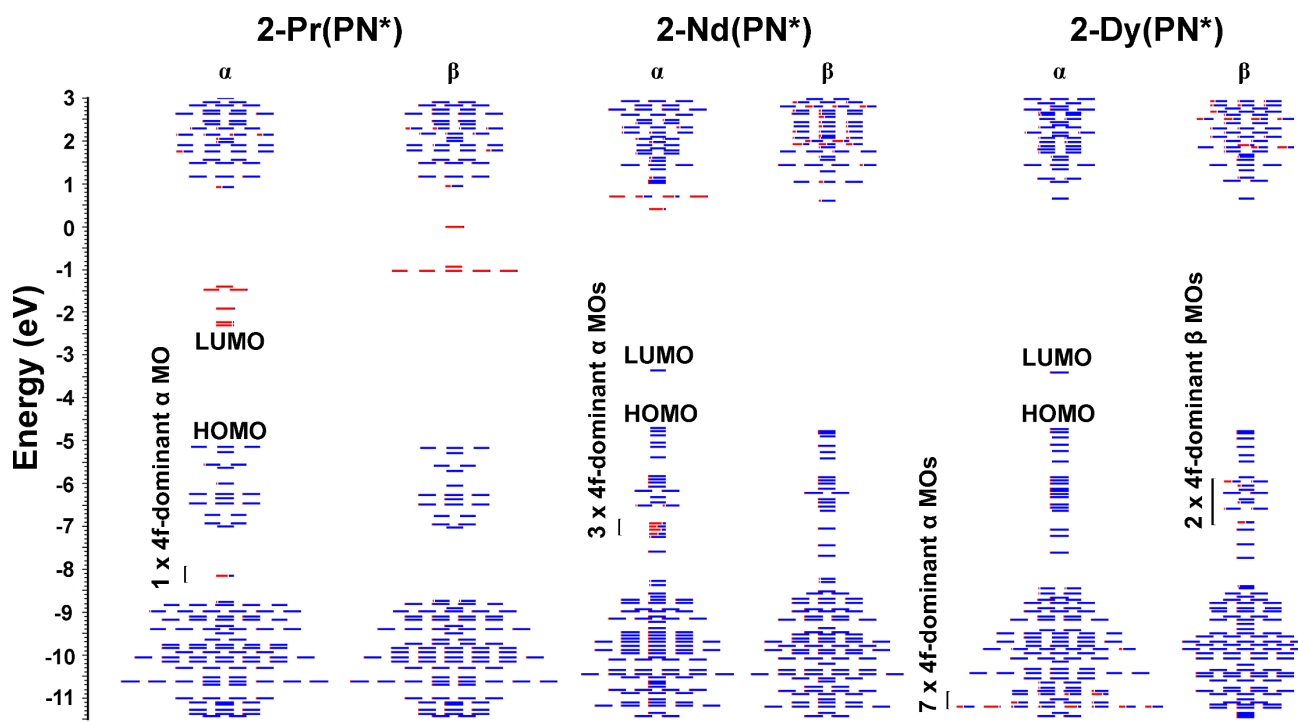

**Figure S37.** Combined ( $\alpha+\beta$ ) MO diagrams of **2-Ln(NP<sup>\*</sup>)**, Ln=Pr, Nd, Dy. The red fraction of the MO lines represents the percentage of Ln AOs in the MOs, and the blue lines are the ligand fraction. Degeneracy of the MO energy levels is set to 0.05 eV.

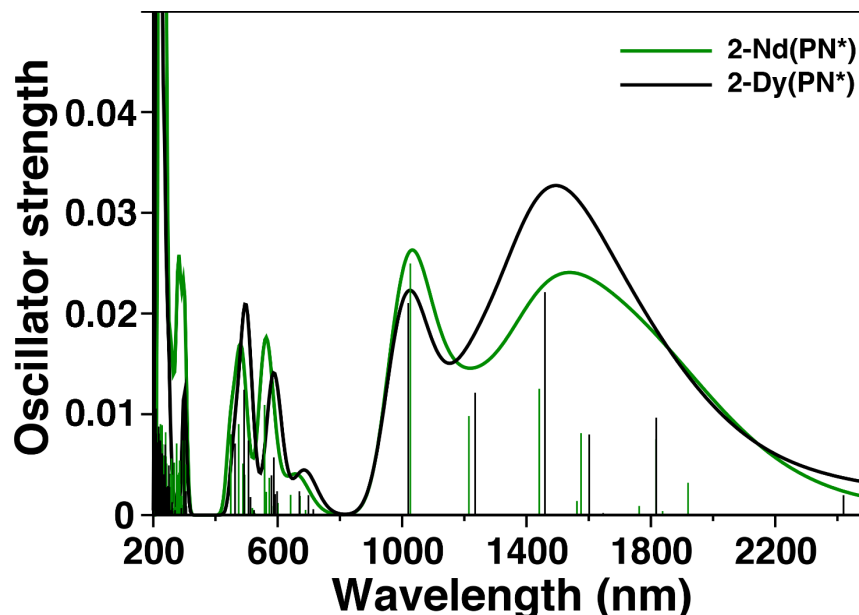

**Figure S38.** Computed TD-DFT spectra of **2-Nd(NP\*)** and **2-Dy(NP\*)**. Vertical bars depict theoretical oscillator strength of single-electron excitations.

#### Details of the TD-DFT and NTO analyses for **2-Dy(NP\*)**.

Similar to the TD-DFT spectrum of **2-Nd(NP\*)**, the broad band at ~840-2500nm in **2-Dy(NP\*)** is attributed to the LLCT excitations arising from the frontier ligand-dominant MOs (primarily 2p orbitals of N atoms) to the LUMO, which is also ligand-dominant (98% orbitals of N, P, C and 2% 4f/5d orbitals of Dy). The band at the ~430-760nm range features similar LLCT excitations. As opposed to **2-Nd(NP\*)**, NTO analysis shows no f-f or MLCT within these energy ranges, in accordance with the significantly lower MO levels of the seven 4f-dominant MOs ( $\alpha$  spin density), residing at the [-10.8 eV; -11.3 eV] range. LMCT excitations originating from the ligand-dominant MOs to the Dy-dominant unoccupied MOs start appearing at ~230nm and higher in energy, in addition to the LLCT excitations. MLCT excitations originating from the 4f-dominant  $\beta$ -MOs to the ligand-dominant orbitals start appearing at ~210nm and higher in energy.

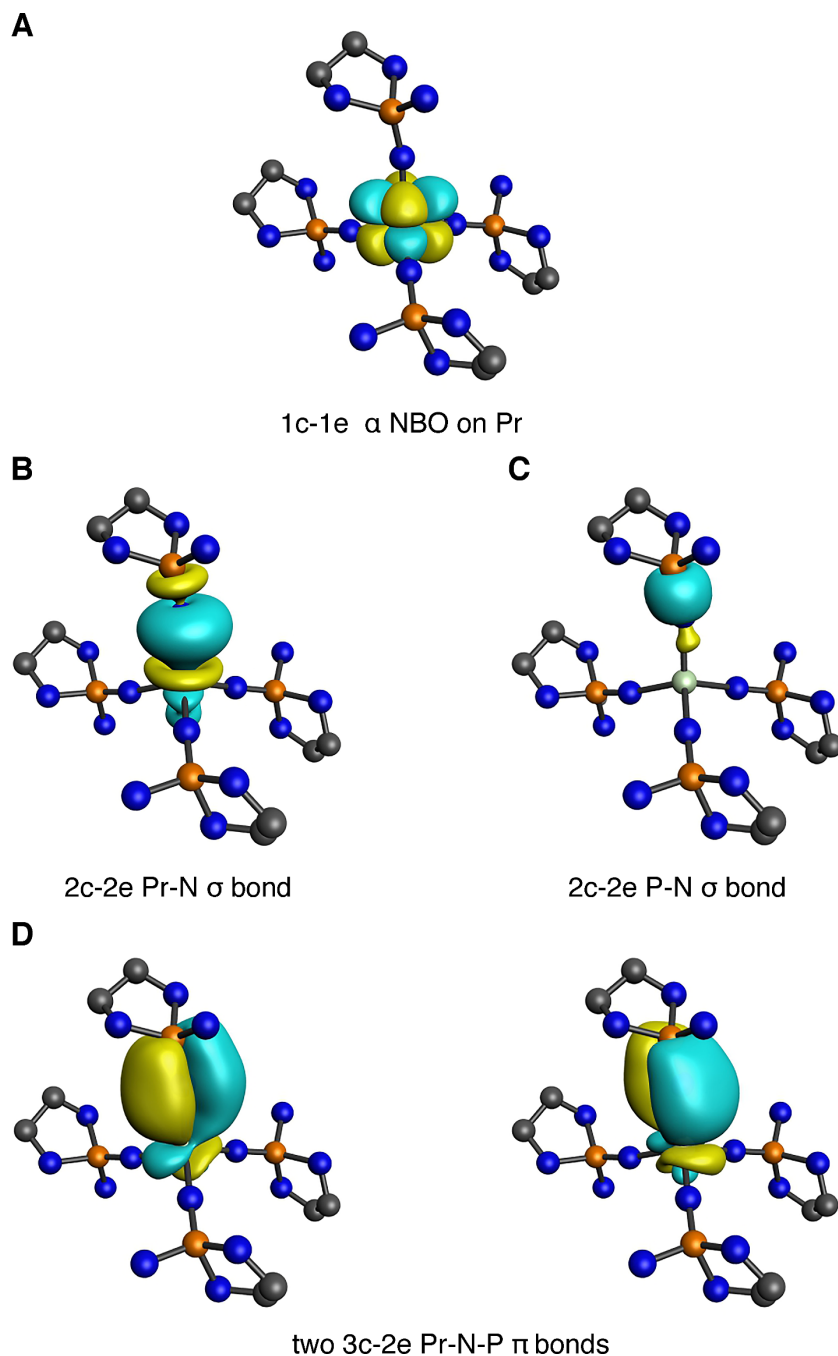

**Figure S39.** Bonding analysis of the Pr–N–P interactions in **2-Pr(NP\*)**. (A) Unpaired Pr 4f electron identified as 1c-1e  $\alpha$  NBO on Pr. (B) Two-center two-electron Pr–N  $\sigma$  bond. (C) Two-center two-electron P–N  $\sigma$  bond. (D) Two three-center two-electron Pr–N–P  $\pi$  bonds. ON denotes occupation number here and elsewhere. H atoms and side groups of the ligands ('Bu, Et<sub>2</sub>) are omitted for simplicity. An equivalent set of bonds is identified for other three ligands.

**Table S14.** ON values ( $|e|$ ) of the Ln–N  $\sigma$  bonds, N–P  $\sigma$  bonds, Ln–N–P  $\pi$  bonds, and 1c-1e  $\alpha$  NBOs (unpaired f electrons on Ln) in **1-Ln(NP\*)**, Ln=Pr, Nd, Dy, and **2-Pr(NP\*)**. ON values for the 1c-1e  $\beta$  NBOs are shown in *italic*.

| Bond/complex     | Pr–N $\sigma$ | N–P $\sigma$ | Pr–N–P $\pi$ | 1c-1e NBOs                                        |
|------------------|---------------|--------------|--------------|---------------------------------------------------|
| <b>1-Pr(NP*)</b> | 1.97          | 1.99         | 1.94         | 1.00; 1.00                                        |
| <b>1-Nd(NP*)</b> | 1.97          | 1.99         | 1.94         | 1.00; 1.00; 1.00                                  |
| <b>1-Dy(NP*)</b> | 1.97          | 1.99         | 1.94         | 1.00; 1.00; 1.00; 1.00; 1.00<br><i>0.95; 1.00</i> |
| <b>2-Pr(NP*)</b> | 1.98          | 1.98         | 1.95         | 1.00                                              |

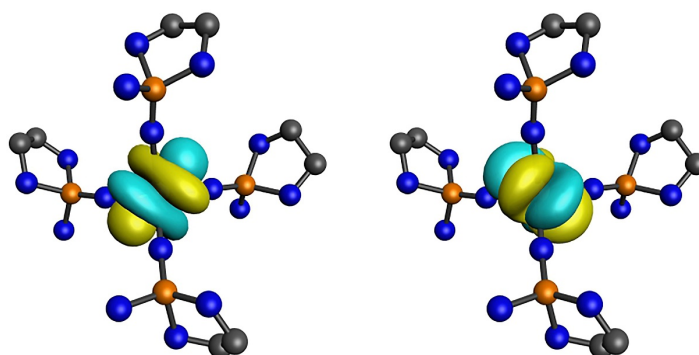

two 1c-1e  $\alpha$  NBOs

**Figure S41.** Two unpaired 4f electrons identified as two 1c-1e  $\alpha$  NBOs on Pr in **1-Pr(NP\*)**. Hydrogen and side groups of the ligands ( $t$ Bu, Et<sub>2</sub>) are omitted for simplicity.

**Table S15.** ON values ( $|e|$ ) of the Ln–N  $\sigma$  bonds, N–P  $\sigma$  bonds, Ln–N–P  $\pi$  bonds, and 1c-1e  $\alpha$  NBOs (unpaired f electrons on Ln) in **2-Nd(NP\*)** and **2-Dy(NP\*)**. ON values for the 1c-1e  $\beta$  NBOs are shown in *italic*.

| Bond/complex     | Ln–N $\sigma$ (longer bond) | Ln–N $\sigma$ (3 shorter bonds) | N–P $\sigma$ (longer & shorter bonds) | Ln–N–P $\pi$ (longer bond)  | Ln–N–P $\pi$ (3 shorter bonds) | 1c-1e NBOs                                        |
|------------------|-----------------------------|---------------------------------|---------------------------------------|-----------------------------|--------------------------------|---------------------------------------------------|
| <b>2-Nd(NP*)</b> | 1.98                        | 1.97                            | 1.99                                  | 1.98 (3c-2e) & 0.99 (3c-1e) | 1.97                           | 0.98; 1.00; 1.00                                  |
| <b>2-Dy(NP*)</b> | 1.97                        | 1.96                            | 1.99                                  | 1.97 (3c-2e) & 0.99 (3c-1e) | 1.97                           | 1.00; 1.00; 1.00; 1.00; 1.00<br><i>0.95; 1.00</i> |



**Table S16.** Bond polarization (%) of the Ln-based NBOs in **1-Ln(NP\*)**, Ln=Pr, Nd, Dy, & **2-Pr(NP\*)**.

| Bond/<br>complex | Ln–N $\sigma$ bond |       | Ln–N–P $\pi$ bonds |       |      |
|------------------|--------------------|-------|--------------------|-------|------|
|                  | Ln                 | N     | Ln                 | N     | P    |
| <b>1-Pr(NP*)</b> | 5.95               | 94.05 | 1.37               | 96.39 | 2.24 |
| <b>1-Nd(NP*)</b> | 5.61               | 94.39 | 1.13               | 96.63 | 2.24 |
| <b>1-Dy(NP*)</b> | 5.60               | 94.40 | 0.91               | 96.88 | 2.21 |
| <b>2-Pr(NP*)</b> | 10.38              | 89.62 | 4.70               | 93.58 | 1.73 |

**Table S17.** Bond polarization (%) of the Ln-based NBOs in **2-Nd(NP\*)** and **2-Dy(NP\*)**.

| Bond/<br>complex | Ln–N $\sigma$<br>(longer<br>bond, avg.) |       | Ln–N $\sigma$<br>(3 shorter<br>bonds, avg.) |       | Ln–N–P $\pi$<br>(longer bond, avg.) |       |      | Ln–N–P $\pi$<br>(3 shorter bonds, avg.) |       |      |
|------------------|-----------------------------------------|-------|---------------------------------------------|-------|-------------------------------------|-------|------|-----------------------------------------|-------|------|
|                  | Ln                                      | N     | Ln                                          | N     | Ln                                  | N     | P    | Ln                                      | N     | P    |
| <b>2-Nd(NP*)</b> | 4.08                                    | 95.92 | 6.49                                        | 93.51 | 0.60                                | 97.65 | 1.75 | 1.68                                    | 96.34 | 1.98 |
| <b>2-Dy(NP*)</b> | 4.13                                    | 95.87 | 5.97                                        | 94.03 | 0.59                                | 97.67 | 1.74 | 1.28                                    | 96.76 | 1.96 |

**Table S18.** Ln hybrids (%) of the Ln-based NBOs in **1-Ln(NP\*)**, Ln=Pr, Nd, Dy, and **2-Pr(NP\*)**. Ln hybrids for the 1c-1e  $\beta$  NBOs are shown in italic for each 1c-1e  $\beta$  NBO.

| Bond<br>character/<br>complex | Ln–N $\sigma$ bond, avg. |      |       |       | Ln–N–P $\pi$ bonds, avg. |       |       |       | 1c-1e NBOs on Ln, avg. |             |             |              |
|-------------------------------|--------------------------|------|-------|-------|--------------------------|-------|-------|-------|------------------------|-------------|-------------|--------------|
|                               | s                        | p    | d     | f     | s                        | p     | d     | f     | s                      | p           | d           | f            |
| <b>1-Pr(NP*)</b>              | 1.18                     | 0.72 | 70.83 | 27.11 | 0.50                     | 5.35  | 26.77 | 64.16 | 0.00                   | 0.02        | 0.11        | 99.88        |
| <b>1-Nd(NP*)</b>              | 1.96                     | 0.50 | 71.32 | 26.03 | 1.57                     | 11.42 | 28.77 | 53.00 | 0.00                   | 0.00        | 0.04        | 99.95        |
| <b>1-Dy(NP*)</b>              | 18.33                    | 0.46 | 73.41 | 7.70  | 1.77                     | 17.73 | 38.39 | 36.26 | 0.00                   | 0.00        | 0.01        | 99.99        |
|                               |                          |      |       |       |                          |       |       |       | <i>0.00</i>            | <i>0.00</i> | <i>0.14</i> | <i>99.86</i> |
|                               |                          |      |       |       |                          |       |       |       | <i>47.33</i>           | <i>0.00</i> | <i>0.01</i> | <i>52.65</i> |
| <b>2-Pr(NP*)</b>              | 0.36                     | 0.47 | 66.03 | 33.03 | 0.03                     | 3.06  | 26.70 | 67.31 | 0.00                   | 0.02        | 0.08        | 99.91        |

**Table S19.** Ln hybrids (%) of the Ln-based NBOs in **2-Nd(NP\*)** and **2-Dy(NP\*)**.

| Bond character/<br>complex | s                                 | p    | d     | f     | s                                | p     | d     | f     |
|----------------------------|-----------------------------------|------|-------|-------|----------------------------------|-------|-------|-------|
|                            | Ln–N shorter $\sigma$ bonds, avg. |      |       |       | Ln–N–P shorter $\pi$ bonds, avg. |       |       |       |
| <b>2-Nd(NP*)</b>           | 0.95                              | 0.53 | 71.79 | 26.55 | 4.06                             | 5.81  | 34.59 | 52.53 |
| <b>2-Dy(NP*)</b>           | 16.62                             | 0.57 | 74.60 | 8.10  | 1.94                             | 13.20 | 41.26 | 39.88 |
|                            | Ln–N longer $\sigma$ bond         |      |       |       | Ln–N–P longer $\pi$ bond, avg.   |       |       |       |
| <b>2-Nd(NP*)</b>           | 1.16                              | 0.27 | 70.09 | 28.33 | 4.31                             | 4.05  | 39.36 | 49.04 |
| <b>2-Dy(NP*)</b>           | 17.63                             | 0.27 | 73.88 | 8.11  | 3.90                             | 6.70  | 62.02 | 24.60 |

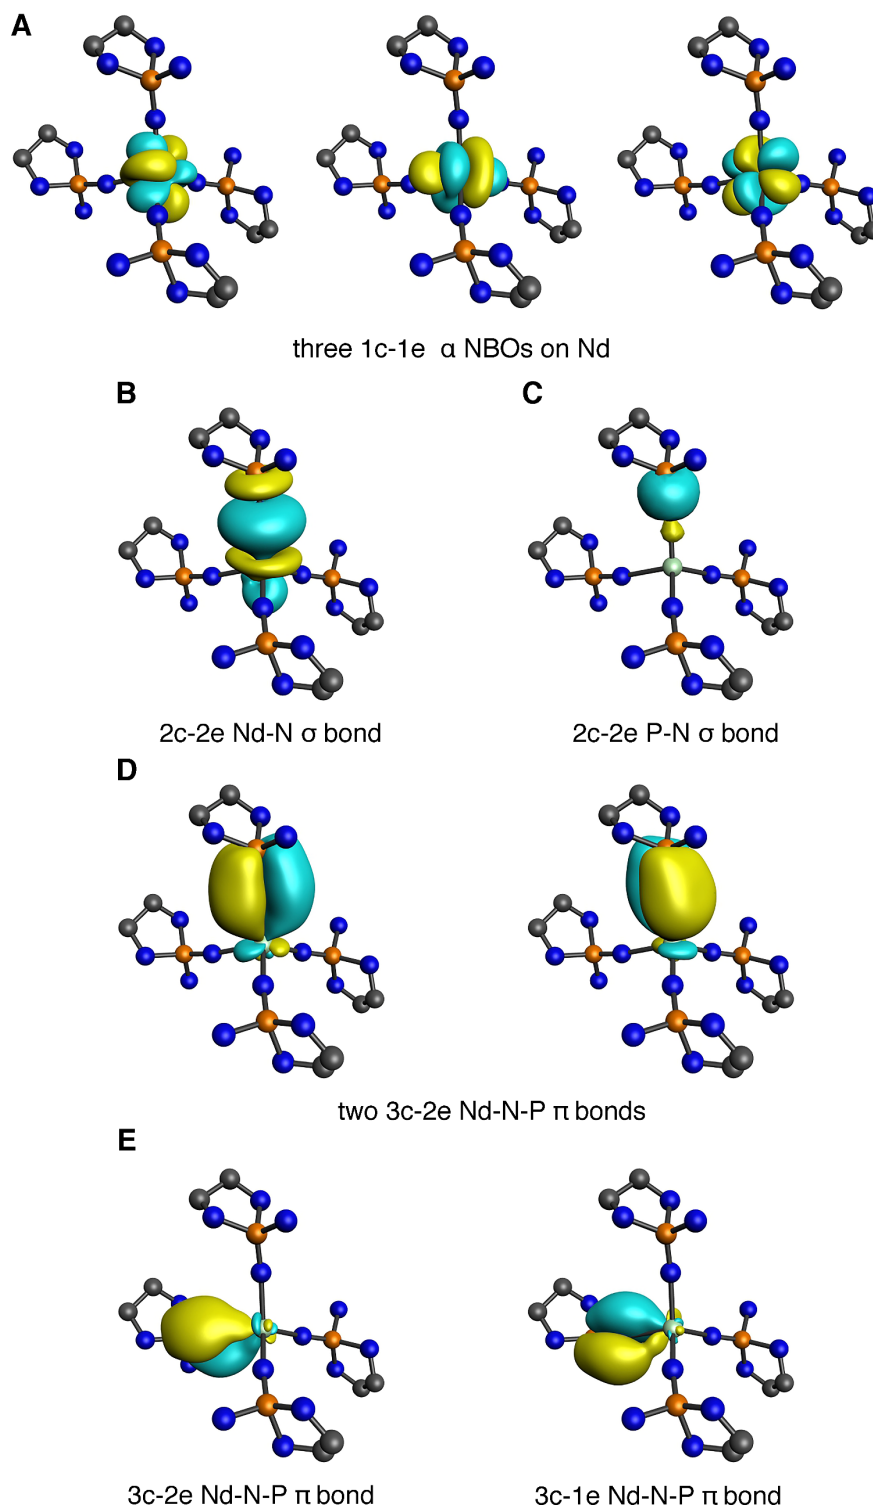

**Figure S42.** Bonding analysis of the Nd–N–P interactions in **2-Nd(NP<sup>\*</sup>)**. (A) Unpaired Nd 4f electrons identified as 1c-1e  $\alpha$  NBOs on Nd. (B) 2c-2e Nd–N  $\sigma$  bond. (C) 2c-2e P–N  $\sigma$  bond. (D) Two 3c-2e Nd–N–P  $\pi$  bonds identified for one of the three shorter Nd–N contacts. An equivalent set of bonds was found for other two ligands. (E) Two Nd–N–P  $\pi$  bonds identified for the longer Nd–N contact. An equivalent set of bonds shown in B and C was identified for other three ligands.

## Multiconfiguration Pair-Density Functional Theory

All MC-PDFT<sup>25-26</sup> calculations were done in the OpenMolcas<sup>27</sup> program package using the extended multistate (XMS-PDFT)<sup>28</sup> version of MC-PDFT. The on-top ftLSDA<sup>29</sup> functional was used for all calculations on a truncated ligand of 61 atoms, cut from the full DFT optimized structure. The basis sets are as follows: ANO-RCC-VTZP<sup>30</sup> for Pr, ANO-RCC-VDZP<sup>31</sup> for C and P, ANO-RCC-MB<sup>32</sup> for H, and MG3S<sup>19, 33-37</sup> for N. Scalar relativity was accounted for by use of the DKH second order Hamiltonian<sup>38</sup> using the 'Expert' keyword and 'RELA=R02E00' in the Seward module. State averaged complete active space self-consistent field (SA-CASSCF) calculations were done to obtain the reference states for the XMS-PDFT calculations. The two SA-CASSCF calculations presented here used an active space of 7 electrons in 11 orbitals (7, 11) with 47 states for the spectrum in the main text and 43 states for the spectrum containing the high energy excitations (see Figs. S9 and S10) for the doublet spin state.

## Active Spaces

The results of two calculations with slightly different active spaces and number of states for the SA-CASSCF calculations are presented because we could not get one SA-CASSCF calculation that included all the orbitals needed for the excitations from the low to high energy regions of the spectrum. The problem is that, formally, the lanthanide has only one electron in the f shell and everything else is empty. This means that the only way to get the necessary orbitals in the active space is by computing enough states to get the electrons to excite into those orbitals. The first problem was that there was a low lying Pr d shell that would come into the active space instead of the f orbitals, even though there were no excitations into these d orbitals. This made it hard to rotate in other f or ligand orbitals that were needed to get the correct states. The second problem was getting the right occupied ligand orbitals in the active space that excite into the f shell. One active space, (AS2 in main text) (Fig. S10) contains two ligand orbitals and one lanthanide p orbital. Removing this p orbital resulted in the ligand orbital L6, the orbital that is necessary for the high energy excitations, leaving the active space and we were unable to get it back in the active space without this p orbital. Attempts were made to get all 7 f orbitals in the active space, but this also resulted in L6 leaving the active space and we could not get L6 back by doing more states or enlarging the active space to a reasonable size.

The second active space (AS1 in main text) contains the same 4 f electrons, but with 3 ligand orbitals that excite into the f shell (Fig S9). By removing the p orbital, L6 was not in the active space and two different correlating orbitals, compared to those in Fig S10, came in the active space. The total number of states in the SA-CASSCF calculation was 47 for this active space and similarly to the first active space, we tried calculating more states and enlarging the active space to try and get L6 in the active space, but it did not work. Some on-going work suggests that p orbitals correlation is important for actinide oxides, even though these orbitals are mostly doubly occupied. This may also be the case with Pr and could be why L6 has trouble staying in the active space, however, more rigorous calculations would be necessary.

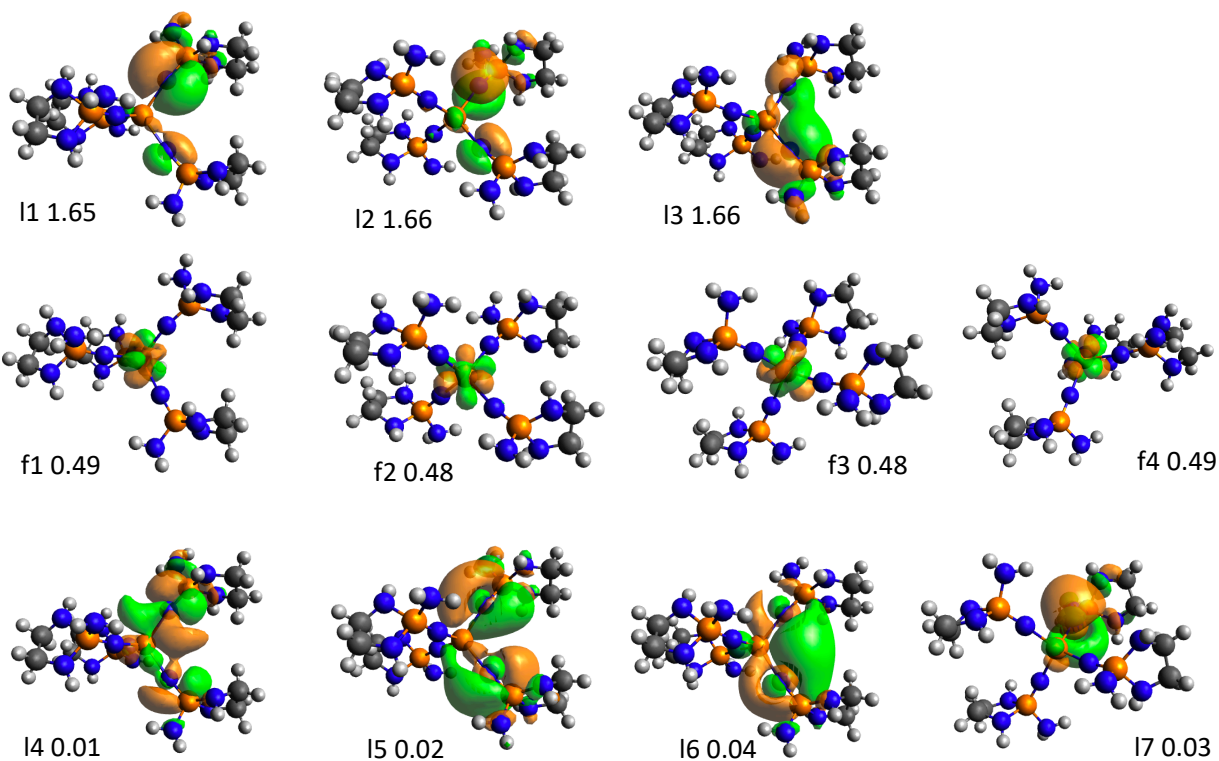

**Figure S43.** Orbitals from active space 1 (AS1) from a (7, 11) SA-CASSCF calculation, with the average natural orbital occupation numbers from the 47 SA-CASSCF calculation. Orbitals l4 and l7 are different correlating orbitals than in Fig. S10. Lowercase letters denote AS1

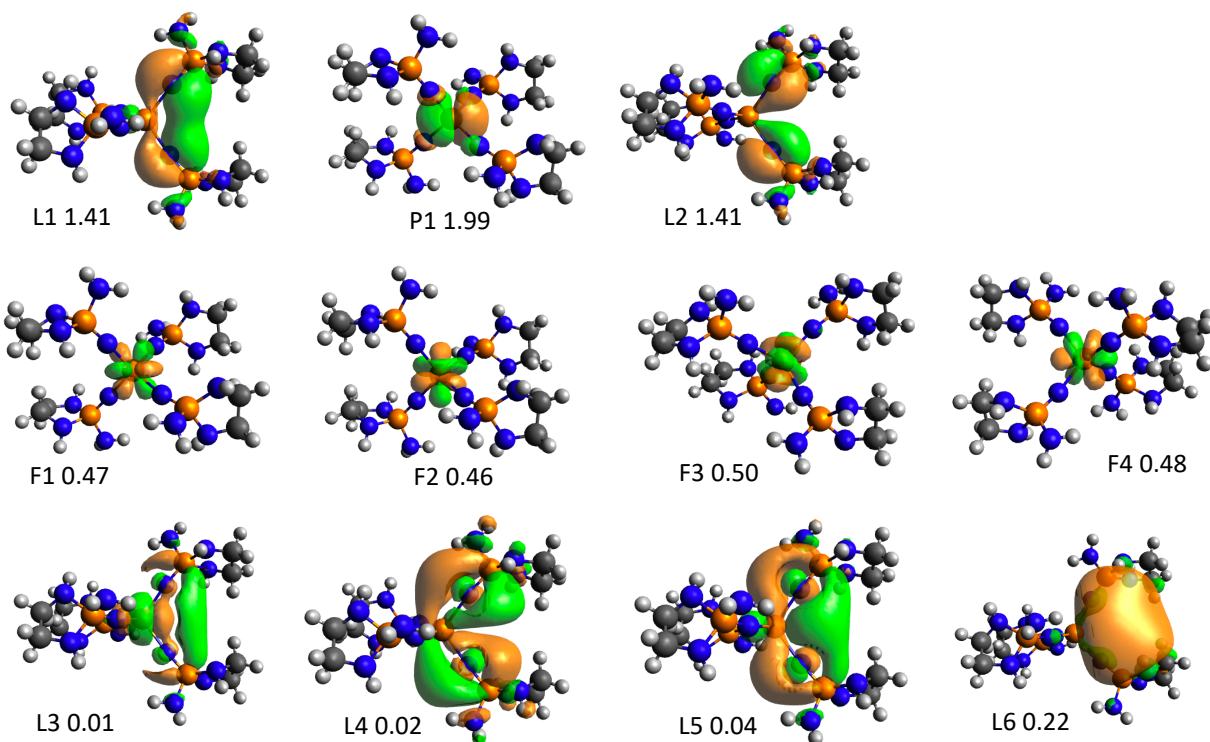

**Figure S44.** Orbitals from active space 2 from a (7, 11) SA-CASSCF calculation, with the average natural orbital occupation numbers from the 43 SA-CASSCF calculation. P1 is the lanthanide p orbital and L6 is the orbital that is necessary for the high energy excitations. Uppercase letters denote AS2 and are numbered independently of AS1 (ie l3 and l3 don't necessarily correspond)

### Spectral Assignment for 300-1200 nm region using AS1

The energies and oscillator strengths for the spectrum in the main text can be found in Table S20. This was a challenging problem to analyze because there are so many configurations in each state and many XMS-PDFT states contained nearly equal contribution from many CASSCF reference states (Table S24). In Table S22, the CI coefficients for configurations with coefficients larger than 0.31 are listed and we attempted to use only these configurations to analyze the XMS-PDFT wave functions, but it seemed that in the XMS-PDFT wave function, nothing simplified to produce an easily digestible result. We decided to present a more qualitative approach at the CASSCF level, where we monitor the change in average natural orbital occupation numbers (NOON) from states CAS1 and CAS3, the two reference states that make up the 1<sup>st</sup> two XMS-PDFT states, in conjunction with analyzing the main configurations from those CAS wave functions. The changes in NOON for CAS1 are in Table S21 and Table S22 contains the main configurations and CI coefficients larger than 0.31. The assignment listed in Table S22 is based on analyzing the configurations and the change in NOON for each state. Most states have excitations between the ligand and f shell, which is also reflected in Table S23, where we analyze the net change in electrons between the ligand and f shells for each state. For nearly every state, there is a net loss of electrons from

the ligand shell and net gain in the f shell. While this indicates L-f transitions, since the net loss is usually around 0.3 electrons and the total number of electrons excited in each state is usually between 1-2 electrons, this indicates there are other types of transitions occurring (Table S23). These possibilities are listed in Table S22 for each CAS state and it's likely that some of these configurations get suppressed at the XMS-PDFT level, but this was difficult to determine exactly by only looking at configurations with coefficients above 0.31.

### Spectral Assignment for 200-300 nm region using AS2

The XMS-PDFT spectrum for the 43 state calculation using active space 2 is shown in **Figure S45**. Similarly to the 47 state spectrum, excitations from the first two states were required for the best description of the experimental spectrum. The natural orbital occupation numbers for the higher energy states are listed in Table S26 and the main configurations are listed in Table S27. States 37 and 38 are comprised of linear combinations of configurations that give the open shell low spin configuration in the ligand shell. These are the first states that occupy L6 and also the first states to have 0.5 electrons in each f orbital. Comparing to the f orbital occupation of the lower energy states (Table S21), these lower energy states mostly occupy 2-3 f orbitals with at least one f orbital containing nearly a whole electron.

The spectrum is shifted 40 nm to match the experimental peak at 280 nm and due to lack of orbital I2, there are no transitions around 400 nm.

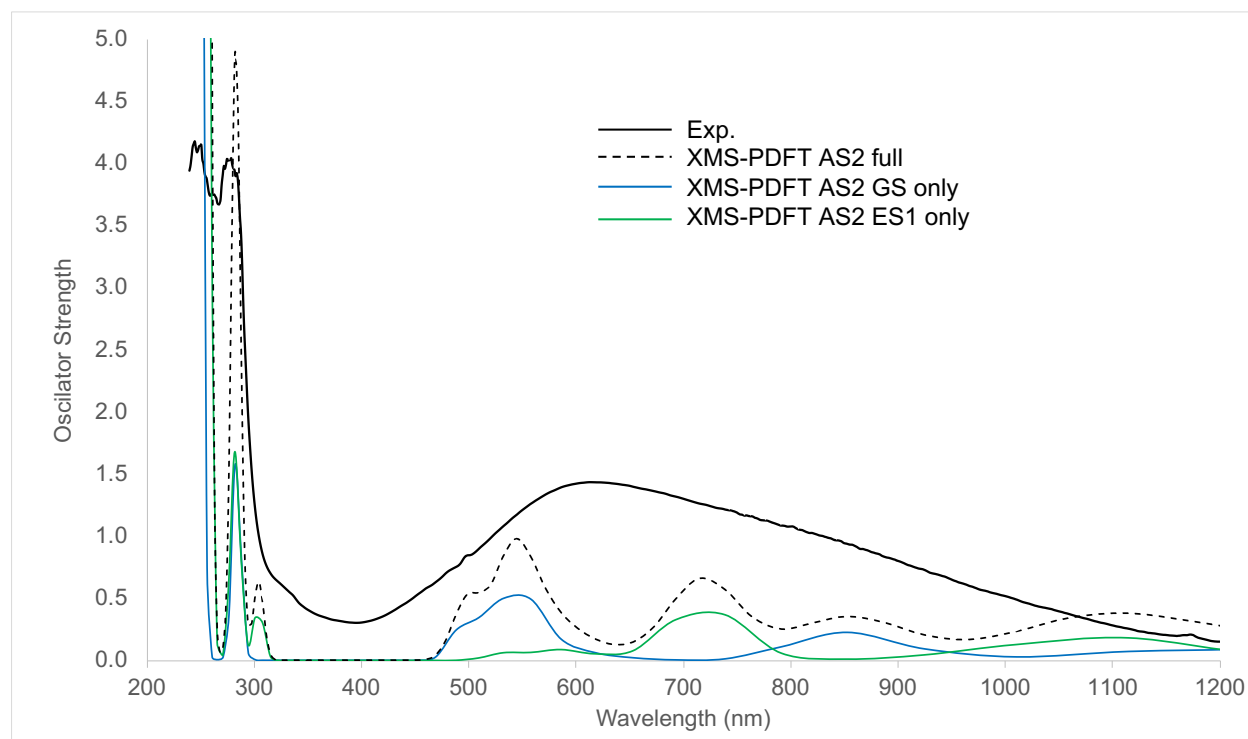

**Figure S45.** XMS-PDFT spectrum using the ftLSDA on-top functional for 43 state calculation, shifted 40 nm to match experimental peak at 280 nm and scaled to match experimental intensities. The dashed line is the total XMS-PDFT spectrum including

excitations from the ground state (GS) (blue) and 1<sup>st</sup> excited state (ES1) (green) using active space 2 (AS2).

Comparing the 47 state calculation with AS1 and 43 state calculation with AS2, it is clear that the additional ligand orbital I2, adds transitions that are missing in the 43 state calculation (Fig. S46). In Fig. S46, the XMS-PDFT energies for the 43 state calculation are not shifted to show that these I2 transitions fall nicely in the troughs of the 43 state spectrum. While the resultant 43 state spectrum is qualitatively a good description, this I2 orbital is necessary for a more accurate description of the states and the resulting XMS-PDFT spectrum. Since including I2 in the active space increased the accuracy of predicted XMS-PDFT energies compared to the experimental spectrum, we think that if we were able to get orbital L6 in active space 1, the higher energy transitions shown in the 43 state calculation would also become more accurate because the states and interaction between the states would be improved. Particularly for the 300-400nm region, the 43 state calculation with AS2 has zero states in that window because of the missing I2 orbital.

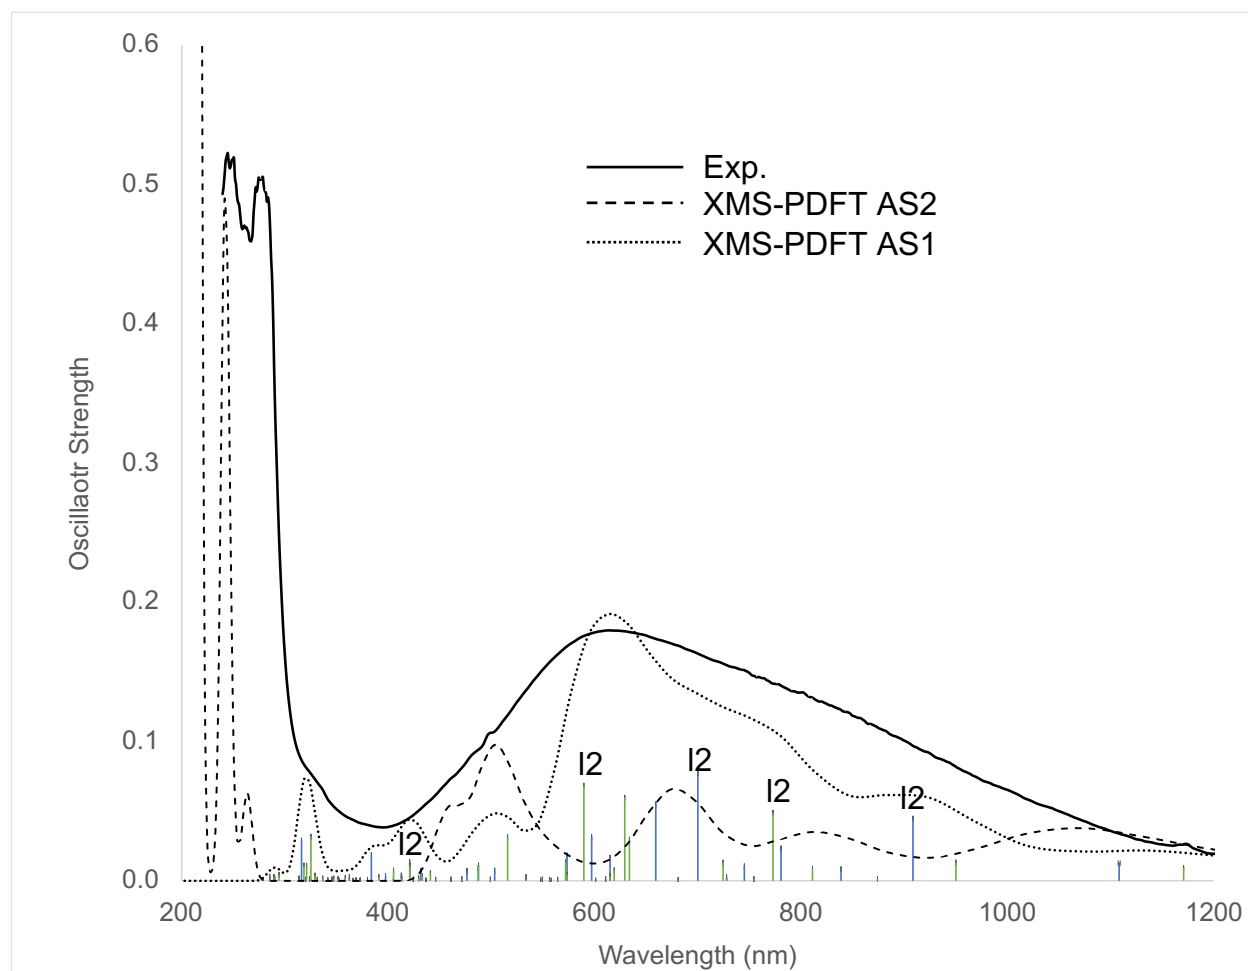

**Figure S46.** XMS-PDFT spectrum using the ftLSDA on-top functional for AS2 (dashed) and XMS-PDFT spectrum using the ftLSDA on-top functional for AS1 (dotted). The stick

intensities correspond to the oscillator strengths for transitions from the 1<sup>st</sup> XMS-PDFT state (blue) and 2<sup>nd</sup> XMS-PDFT state (green) for the 47 state calculation with AS1. The I2 labels correspond to transitions in the 47 state calculation that originate from orbital I2.

### Comparison to TD-DFT

The TD-DFT computed spectrum is shown in Figure S47 with the XMS-PDFT spectrum of the 47 state calculation. By plotting only the stick spectrum for transitions from the ground XMS-PDFT state and the corresponding fitted spectrum (blue line in Fig S47), it seems that in the 500-1200nm range, the XMS-PDFT transitions from the ground state correspond well to the TD-DFT spectrum. The XMS-PDFT stick spectrum is clustered under the TD-DFT peaks in this region and the peak maxima of the fitted XMS-PDFT spectrum from the ground state align with the peak maxima of the TD-DFT spectrum. This indicates that part of the TD-DFT spectrum is likely correct.

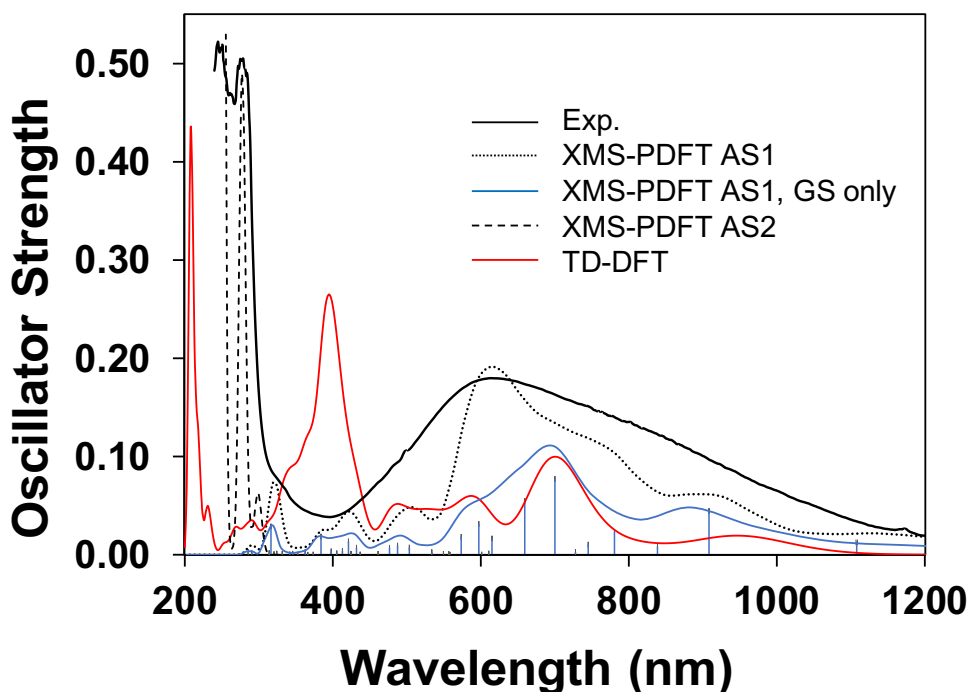

**Figure S47.** XMS-PDFT spectrum for AS1 (dotted), XMS-PDFT spectrum using ground state (GS) only of 47 state calculation (blue), and TD-DFT spectrum (red), where all are scaled to the XMS-PDFT intensities. The blue sticks are oscillator strengths for transitions from the ground XMS-PDFT state of the 47 state calculation. The dashed line corresponds to XMS-PDFT with AS2 for only the high energy region, shifted 35 nm.

Looking at Figure S48, the feature  $A_T$  clearly corresponds to  $A_X$ , where T and X refer for TD-DFT and XMS-PDFT, respectively. Looking at the M diagnostic,<sup>39</sup> which is a measure of multireference character in a wave function, the M value for the transitions in  $A_X$  at the CASSCF level are between 0.8-1.5 (Table S27). Significant multireference character corresponds to values of  $M > 0.1$  and these states can therefore be challenging to describe correctly (right energy and character) with single reference methods, such as



TD-DFT. Not only are these excited states significantly multiconfigurational, the 1<sup>st</sup> and 2<sup>nd</sup> reference CASSCF states (states that contribute to ground XMS-PDFT states for AS2) also have large multireference character with an M value of about 0.6. Not only do the transitions in A<sub>x</sub> have significant multireference character, there is also a substantial contribution from transitions from the 1<sup>st</sup> excited XMS-PDFT state (Fig S45). The region in the box B<sub>x</sub>, in Fig. S48 is also dominated by transitions from the nearly degenerate XMS-PDFT state and this is the region where the TD-DFT intensity is the most inaccurate. Similarly to the A<sub>x</sub> transitions, the M value for all the CASSCF reference states that make up the XMS-PDFT transitions in this region (states XMS 11-16) are significantly greater than 0.1, with many close to 1 or > 1 (Table S25). A hypothetical shifted TD-DFT spectrum is presented in Figure S49 and is in good much better agreement with XMS-PDFT.

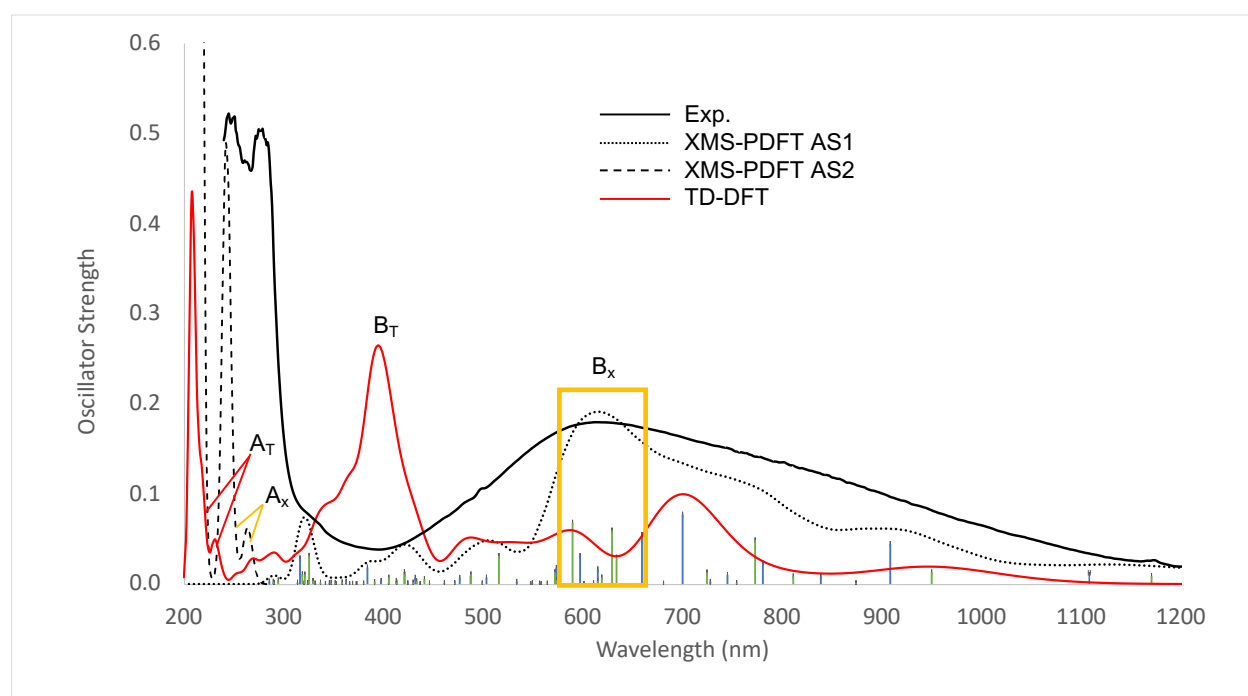

**Figure S48.** XMS-PDFT spectrum for AS1 (dotted), XMS-PDFT spectrum for AS2 at high energy (unshifted, dashed), and TD-DFT spectrum (red), where the intensities all are scaled to the XMS-PDFT intensities. The blue sticks are oscillator strengths for transitions from the ground XMS-PDFT state and the green are oscillator strengths for transitions from the 1<sup>st</sup> excited XMS-PDFT state of the 47 state calculation. A<sub>T</sub>/B<sub>T</sub> and A<sub>x</sub>/B<sub>x</sub> refer to groups of corresponding transitions between TD-DFT and XMS-PDFT, where T stands for TD-DFT and X stands for XMS-PDFT.

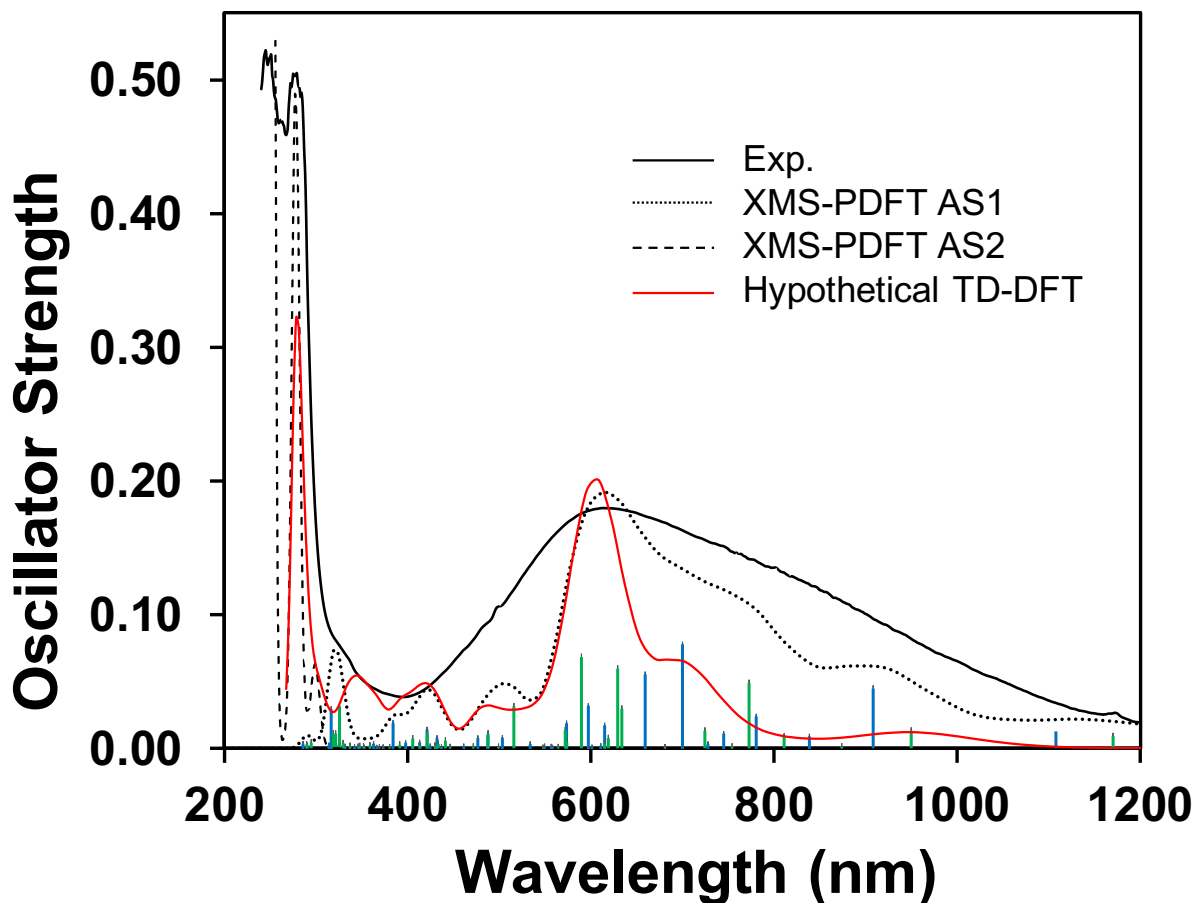

**Figure S49.** Hypothetical TDDFT spectrum, where the transitions around 200 nm in Fig 6 are red-shifted by 70 nm and those between 360-430 nm with oscillator strength > 0.01 are red-shifted by 215 nm.

### Conclusions

The XMS-PDFT spectrum is in good agreement with the experimental spectrum for **2-Pr(NP\*)** and there are two nearly degenerate states that contribute excitations to the spectrum. Each transition contains ligand to f transitions and the transitions in the 200-300 nm region also contain ligand to ligand transitions. We made a significant effort at the CASSCF level to get one active space that described the entire spectrum but could not get the orbital L6, in the same active space as the 47 state calculation. We think that if we were able to do so, the shift in energy found for XMS-PDFT for AS2 would be remediated. These states have very significant multireference character and regions of the spectrum that are dominated by excitations from the nearly degenerate XMS-PDFT state are the most poorly described by TD-DFT. The purpose of MC-PDFT was to be able to describe multiconfigurational wave functions accurately to do so at an affordable cost. This problem shows the promise of MC-PDFT for large applications and for the interested reader, the total time spent in the MC-PDFT module was ~24 hours and would be significantly greater for methods such as CASPT2.

**Table S20.** XMS-PDFT relative energies (cm<sup>-1</sup>) and oscillator strengths from 47 state calculation for the ground state (state 1) and 1<sup>st</sup> excited state (state 2).

| State | Rel. E (cm <sup>-1</sup> ) | osc. strength | Rel. E (cm <sup>-1</sup> ) | osc. strength |
|-------|----------------------------|---------------|----------------------------|---------------|
| 1     | 0.00                       |               |                            |               |
| 2     | 497.0612                   | 0.00001564    | 0.00                       |               |
| 3     | 7817.1305                  | 0.00295011    | 7320.0693                  | 0.0025437     |
| 4     | 9319.1379                  | 0.01265071    | 8822.0767                  | 0.0090081     |
| 5     | 11366.7996                 | 0.04461763    | 10869.7384                 | 0.0130847     |
| 6     | 12310.5694                 | 0.00828895    | 11813.5082                 | 0.0012369     |
| 7     | 13226.9964                 | 0.02322543    | 12729.9352                 | 0.0086705     |
| 8     | 13857.0355                 | 0.01035117    | 13359.9743                 | 0.0487863     |
| 9     | 14184.1369                 | 0.00264888    | 13687.0757                 | 0.0012203     |
| 10    | 14747.3796                 | 0.07720792    | 14250.3184                 | 0.0130833     |
| 11    | 15658.7706                 | 0.05483312    | 15161.7094                 | 0.0006018     |
| 12    | 16786.0691                 | 0.01653620    | 16289.0079                 | 0.0295390     |
| 13    | 16903.0374                 | 0.00127735    | 16405.9762                 | 0.0596087     |
| 14    | 17173.8213                 | 0.00017004    | 16676.7601                 | 0.0075350     |
| 15    | 17286.2758                 | 0.03129714    | 16789.2146                 | 0.0033811     |
| 16    | 18003.8487                 | 0.01816191    | 17506.7875                 | 0.0682376     |
| 17    | 18494.9765                 | 0.00007877    | 17997.9153                 | 0.0042779     |
| 18    | 18546.2144                 | 0.00076773    | 18049.1532                 | 0.0133637     |
| 19    | 18790.5202                 | 0.00095160    | 18293.4590                 | 0.0007419     |
| 20    | 19343.1975                 | 0.00264995    | 18846.1363                 | 0.0002158     |
| 21    | 20509.3819                 | 0.00729930    | 20012.3207                 | 0.0312989     |
| 22    | 21180.3642                 | 0.00928975    | 20683.3030                 | 0.0009573     |
| 23    | 21663.1896                 | 0.00712442    | 21166.1284                 | 0.0109815     |
| 24    | 22387.3168                 | 0.00095261    | 21890.2556                 | 0.0011809     |
| 25    | 23632.2601                 | 0.00027110    | 23135.1989                 | 0.0008205     |
| 26    | 23899.9978                 | 0.00717943    | 23402.9366                 | 0.0056483     |
| 27    | 24317.5109                 | 0.00101888    | 23820.4497                 | 0.0031564     |
| 28    | 24515.6581                 | 0.01352048    | 24018.5969                 | 0.0018383     |
| 29    | 24998.6361                 | 0.00380037    | 24501.5749                 | 0.0110812     |
| 30    | 25468.4676                 | 0.00147563    | 24971.4064                 | 0.0017309     |
| 31    | 25957.6836                 | 0.00346055    | 25460.6224                 | 0.0073351     |
| 32    | 26884.4883                 | 0.01847093    | 26387.4271                 | 0.0026104     |
| 33    | 27649.3634                 | 0.00021229    | 27152.3022                 | 0.0007212     |
| 34    | 28190.9820                 | 0.00004435    | 27693.9208                 | 0.0001538     |
| 35    | 28465.6360                 | 0.00272362    | 27968.5748                 | 0.0004711     |
| 36    | 29278.8905                 | 0.00009975    | 28781.8293                 | 0.0020107     |
| 37    | 29850.6982                 | 0.00105246    | 29353.6370                 | 0.0012196     |
| 38    | 30194.9555                 | 0.00042019    | 29697.8943                 | 0.0015911     |
| 39    | 31136.7367                 | 0.00086462    | 30639.6755                 | 0.0016932     |

|    |            |            |            |           |
|----|------------|------------|------------|-----------|
| 40 | 31834.2306 | 0.00122305 | 31337.1694 | 0.0037089 |
| 41 | 32212.9149 | 0.00071355 | 31715.8537 | 0.0315884 |
| 42 | 32628.4823 | 0.02882238 | 32131.4211 | 0.0107686 |
| 43 | 32887.3302 | 0.00169618 | 32390.2690 | 0.0109694 |
| 44 | 35539.5975 | 0.00160865 | 35042.5363 | 0.0041996 |
| 45 | 36142.6517 | 0.00291741 | 35645.5905 | 0.0028041 |
| 46 | 53475.4369 | 0.00016567 | 52978.3757 | 0.0000935 |
| 47 | 54292.0501 | 0.00040032 | 53794.9889 | 0.0000497 |

**Table S21.** Natural orbital occupation numbers for 47 state calculation, labeled according to orbitals in Fig. S9, with difference from CAS state 1 in bold.

| CAS ref. | l1            | l2            | l3            | f1            | f2            | l4            | l5            | f3            | l6            | l7            | f4            |
|----------|---------------|---------------|---------------|---------------|---------------|---------------|---------------|---------------|---------------|---------------|---------------|
| 1        | 1.493         | 1.858         | 1.945         | 0.504         | 0.993         | 0.004         | 0.016         | 0.121         | 0.037         | 0.025         | 0.004         |
| 2        | 1.427         | 1.916         | 1.946         | 0.063         | 0.573         | 0.004         | 0.015         | 0.992         | 0.036         | 0.026         | 0.003         |
|          | <b>-0.066</b> | <b>0.058</b>  | <b>0.001</b>  | <b>-0.441</b> | <b>-0.420</b> | <b>-0.001</b> | <b>-0.001</b> | <b>0.871</b>  | <b>-0.001</b> | <b>0.001</b>  | <b>-0.001</b> |
| 3        | 1.474         | 1.859         | 1.948         | 0.111         | 0.526         | 0.004         | 0.016         | 0.012         | 0.037         | 0.024         | 0.989         |
|          | <b>-0.019</b> | <b>0.001</b>  | <b>0.003</b>  | <b>-0.393</b> | <b>-0.467</b> | <b>0.000</b>  | <b>0.000</b>  | <b>-0.109</b> | <b>-0.001</b> | <b>0.000</b>  | <b>0.985</b>  |
| 4        | 1.963         | 1.356         | 1.970         | 0.636         | 1.004         | 0.003         | 0.022         | 0.006         | 0.028         | 0.010         | 0.001         |
|          | <b>0.470</b>  | <b>-0.501</b> | <b>0.025</b>  | <b>0.132</b>  | <b>0.011</b>  | <b>-0.001</b> | <b>0.006</b>  | <b>-0.115</b> | <b>-0.009</b> | <b>-0.015</b> | <b>-0.003</b> |
| 5        | 1.067         | 1.969         | 1.959         | 0.006         | 0.934         | 0.002         | 0.010         | 0.996         | 0.031         | 0.026         | 0.001         |
|          | <b>-0.426</b> | <b>0.111</b>  | <b>0.014</b>  | <b>-0.499</b> | <b>-0.060</b> | <b>-0.002</b> | <b>-0.006</b> | <b>0.875</b>  | <b>-0.006</b> | <b>0.001</b>  | <b>-0.003</b> |
| 6        | 1.892         | 1.170         | 1.965         | 0.045         | 0.832         | 0.002         | 0.023         | 0.101         | 0.029         | 0.011         | 0.932         |
|          | <b>0.400</b>  | <b>-0.688</b> | <b>0.021</b>  | <b>-0.460</b> | <b>-0.161</b> | <b>-0.002</b> | <b>0.007</b>  | <b>-0.020</b> | <b>-0.009</b> | <b>-0.014</b> | <b>0.928</b>  |
| 7        | 1.677         | 1.308         | 1.967         | 0.291         | 0.694         | 0.002         | 0.019         | 0.927         | 0.028         | 0.015         | 0.072         |
|          | <b>0.184</b>  | <b>-0.549</b> | <b>0.022</b>  | <b>-0.214</b> | <b>-0.299</b> | <b>-0.002</b> | <b>0.003</b>  | <b>0.806</b>  | <b>-0.009</b> | <b>-0.010</b> | <b>0.068</b>  |
| 8        | 1.956         | 1.100         | 1.970         | 0.990         | 0.011         | 0.002         | 0.022         | 0.895         | 0.027         | 0.009         | 0.019         |
|          | <b>0.463</b>  | <b>-0.758</b> | <b>0.026</b>  | <b>0.485</b>  | <b>-0.982</b> | <b>-0.003</b> | <b>0.006</b>  | <b>0.774</b>  | <b>-0.010</b> | <b>-0.016</b> | <b>0.015</b>  |
| 9        | 1.426         | 1.573         | 1.962         | 0.558         | 0.412         | 0.002         | 0.016         | 0.029         | 0.031         | 0.020         | 0.971         |
|          | <b>-0.067</b> | <b>-0.285</b> | <b>0.017</b>  | <b>0.054</b>  | <b>-0.581</b> | <b>-0.002</b> | <b>0.000</b>  | <b>-0.092</b> | <b>-0.007</b> | <b>-0.005</b> | <b>0.967</b>  |
| 10       | 1.336         | 1.886         | 1.727         | 0.119         | 0.306         | 0.004         | 0.020         | 0.832         | 0.037         | 0.027         | 0.704         |
|          | <b>-0.157</b> | <b>0.029</b>  | <b>-0.218</b> | <b>-0.385</b> | <b>-0.687</b> | <b>0.000</b>  | <b>0.004</b>  | <b>0.712</b>  | <b>0.000</b>  | <b>0.003</b>  | <b>0.700</b>  |
| 11       | 1.683         | 1.909         | 1.326         | 0.144         | 0.699         | 0.005         | 0.025         | 0.852         | 0.039         | 0.030         | 0.289         |
|          | <b>0.190</b>  | <b>0.051</b>  | <b>-0.619</b> | <b>-0.361</b> | <b>-0.294</b> | <b>0.000</b>  | <b>0.009</b>  | <b>0.731</b>  | <b>0.002</b>  | <b>0.005</b>  | <b>0.285</b>  |
| 12       | 1.746         | 1.809         | 1.388         | 0.188         | 0.640         | 0.005         | 0.025         | 0.832         | 0.039         | 0.028         | 0.299         |
|          | <b>0.253</b>  | <b>-0.048</b> | <b>-0.557</b> | <b>-0.317</b> | <b>-0.354</b> | <b>0.001</b>  | <b>0.009</b>  | <b>0.712</b>  | <b>0.002</b>  | <b>0.004</b>  | <b>0.295</b>  |
| 13       | 1.757         | 1.509         | 1.648         | 0.211         | 0.343         | 0.005         | 0.024         | 0.783         | 0.039         | 0.023         | 0.657         |
|          | <b>0.264</b>  | <b>-0.349</b> | <b>-0.296</b> | <b>-0.293</b> | <b>-0.650</b> | <b>0.001</b>  | <b>0.008</b>  | <b>0.662</b>  | <b>0.001</b>  | <b>-0.002</b> | <b>0.653</b>  |
| 14       | 1.944         | 1.893         | 1.081         | 0.017         | 0.917         | 0.004         | 0.021         | 0.069         | 0.032         | 0.030         | 0.991         |
|          | <b>0.451</b>  | <b>0.036</b>  | <b>-0.864</b> | <b>-0.487</b> | <b>-0.077</b> | <b>0.000</b>  | <b>0.005</b>  | <b>-0.051</b> | <b>-0.005</b> | <b>0.005</b>  | <b>0.987</b>  |
| 15       | 1.873         | 1.959         | 1.134         | 0.883         | 0.074         | 0.004         | 0.021         | 0.951         | 0.033         | 0.030         | 0.037         |
|          | <b>0.381</b>  | <b>0.101</b>  | <b>-0.811</b> | <b>0.379</b>  | <b>-0.919</b> | <b>0.000</b>  | <b>0.005</b>  | <b>0.830</b>  | <b>-0.005</b> | <b>0.005</b>  | <b>0.033</b>  |
| 16       | 1.408         | 1.626         | 1.903         | 0.599         | 0.828         | 0.004         | 0.018         | 0.058         | 0.034         | 0.022         | 0.499         |
|          | <b>-0.084</b> | <b>-0.231</b> | <b>-0.042</b> | <b>0.094</b>  | <b>-0.165</b> | <b>-0.001</b> | <b>0.002</b>  | <b>-0.062</b> | <b>-0.003</b> | <b>-0.002</b> | <b>0.495</b>  |
| 17       | 1.662         | 1.346         | 1.923         | 0.753         | 0.404         | 0.003         | 0.020         | 0.078         | 0.031         | 0.017         | 0.764         |
|          | <b>0.169</b>  | <b>-0.511</b> | <b>-0.021</b> | <b>0.249</b>  | <b>-0.589</b> | <b>-0.001</b> | <b>0.003</b>  | <b>-0.043</b> | <b>-0.007</b> | <b>-0.008</b> | <b>0.760</b>  |
| 18       | 1.944         | 1.017         | 1.970         | 0.293         | 1.356         | 0.003         | 0.022         | 0.091         | 0.028         | 0.010         | 0.267         |
|          | <b>0.451</b>  | <b>-0.841</b> | <b>0.025</b>  | <b>-0.212</b> | <b>0.363</b>  | <b>-0.002</b> | <b>0.006</b>  | <b>-0.030</b> | <b>-0.009</b> | <b>-0.015</b> | <b>0.263</b>  |
| 19       | 1.117         | 1.945         | 1.904         | 0.972         | 0.045         | 0.003         | 0.015         | 0.899         | 0.035         | 0.027         | 0.037         |

|    |               |               |               |               |               |               |               |               |               |               |              |
|----|---------------|---------------|---------------|---------------|---------------|---------------|---------------|---------------|---------------|---------------|--------------|
|    | <b>-0.376</b> | <b>0.087</b>  | <b>-0.040</b> | <b>0.468</b>  | <b>-0.948</b> | <b>-0.001</b> | <b>-0.001</b> | <b>0.778</b>  | <b>-0.002</b> | <b>0.002</b>  | <b>0.033</b> |
| 20 | 1.910         | 1.968         | 1.061         | 0.041         | 0.011         | 0.004         | 0.016         | 0.947         | 0.031         | 0.029         | 0.982        |
|    | <b>0.417</b>  | <b>0.110</b>  | <b>-0.884</b> | <b>-0.464</b> | <b>-0.982</b> | <b>0.000</b>  | <b>0.000</b>  | <b>0.826</b>  | <b>-0.006</b> | <b>0.004</b>  | <b>0.978</b> |
| 21 | 1.228         | 1.952         | 1.776         | 0.977         | 0.089         | 0.004         | 0.018         | 0.559         | 0.037         | 0.028         | 0.332        |
|    | <b>-0.265</b> | <b>0.095</b>  | <b>-0.169</b> | <b>0.473</b>  | <b>-0.905</b> | <b>-0.001</b> | <b>0.002</b>  | <b>0.438</b>  | <b>0.000</b>  | <b>0.003</b>  | <b>0.328</b> |
| 22 | 1.792         | 1.838         | 1.307         | 0.918         | 0.047         | 0.005         | 0.025         | 0.223         | 0.038         | 0.029         | 0.777        |
|    | <b>0.299</b>  | <b>-0.019</b> | <b>-0.637</b> | <b>0.413</b>  | <b>-0.946</b> | <b>0.001</b>  | <b>0.009</b>  | <b>0.102</b>  | <b>0.001</b>  | <b>0.004</b>  | <b>0.773</b> |
| 23 | 1.890         | 1.253         | 1.844         | 0.582         | 0.070         | 0.005         | 0.023         | 1.058         | 0.033         | 0.016         | 0.227        |
|    | <b>0.397</b>  | <b>-0.604</b> | <b>-0.101</b> | <b>0.077</b>  | <b>-0.923</b> | <b>0.000</b>  | <b>0.007</b>  | <b>0.937</b>  | <b>-0.004</b> | <b>-0.009</b> | <b>0.223</b> |
| 24 | 1.917         | 1.340         | 1.665         | 0.164         | 0.415         | 0.005         | 0.026         | 0.637         | 0.038         | 0.021         | 0.774        |
|    | <b>0.424</b>  | <b>-0.518</b> | <b>-0.280</b> | <b>-0.341</b> | <b>-0.579</b> | <b>0.001</b>  | <b>0.009</b>  | <b>0.516</b>  | <b>0.000</b>  | <b>-0.004</b> | <b>0.770</b> |
| 25 | 1.934         | 1.602         | 1.377         | 0.366         | 0.876         | 0.006         | 0.025         | 0.209         | 0.040         | 0.027         | 0.537        |
|    | <b>0.441</b>  | <b>-0.256</b> | <b>-0.568</b> | <b>-0.138</b> | <b>-0.117</b> | <b>0.002</b>  | <b>0.009</b>  | <b>0.088</b>  | <b>0.002</b>  | <b>0.002</b>  | <b>0.533</b> |
| 26 | 1.139         | 1.884         | 1.923         | 0.518         | 0.171         | 0.003         | 0.014         | 0.051         | 0.034         | 0.026         | 1.238        |
|    | <b>-0.354</b> | <b>0.026</b>  | <b>-0.022</b> | <b>0.013</b>  | <b>-0.822</b> | <b>-0.001</b> | <b>-0.002</b> | <b>-0.070</b> | <b>-0.003</b> | <b>0.001</b>  | <b>1.234</b> |
| 27 | 1.965         | 1.017         | 1.958         | 0.474         | 0.125         | 0.002         | 0.022         | 0.005         | 0.028         | 0.009         | 1.396        |
|    | <b>0.472</b>  | <b>-0.841</b> | <b>0.013</b>  | <b>-0.030</b> | <b>-0.868</b> | <b>-0.002</b> | <b>0.006</b>  | <b>-0.116</b> | <b>-0.010</b> | <b>-0.015</b> | <b>1.392</b> |
| 28 | 1.929         | 1.958         | 1.261         | 0.671         | 0.078         | 0.004         | 0.018         | 1.011         | 0.032         | 0.029         | 0.008        |
|    | <b>0.436</b>  | <b>0.101</b>  | <b>-0.684</b> | <b>0.167</b>  | <b>-0.915</b> | <b>0.000</b>  | <b>0.002</b>  | <b>0.890</b>  | <b>-0.005</b> | <b>0.005</b>  | <b>0.004</b> |
| 29 | 1.933         | 1.961         | 1.001         | 0.151         | 0.050         | 0.004         | 0.017         | 0.701         | 0.031         | 0.029         | 1.120        |
|    | <b>0.440</b>  | <b>0.104</b>  | <b>-0.943</b> | <b>-0.354</b> | <b>-0.943</b> | <b>0.000</b>  | <b>0.001</b>  | <b>0.580</b>  | <b>-0.006</b> | <b>0.005</b>  | <b>1.116</b> |
| 30 | 1.457         | 1.891         | 1.847         | 0.387         | 0.819         | 0.006         | 0.020         | 0.202         | 0.038         | 0.028         | 0.305        |
|    | <b>-0.036</b> | <b>0.034</b>  | <b>-0.098</b> | <b>-0.117</b> | <b>-0.174</b> | <b>0.002</b>  | <b>0.004</b>  | <b>0.081</b>  | <b>0.001</b>  | <b>0.003</b>  | <b>0.301</b> |
| 31 | 1.844         | 1.935         | 1.261         | 0.497         | 0.154         | 0.005         | 0.022         | 0.097         | 0.035         | 0.029         | 1.122        |
|    | <b>0.351</b>  | <b>0.078</b>  | <b>-0.684</b> | <b>-0.008</b> | <b>-0.839</b> | <b>0.001</b>  | <b>0.005</b>  | <b>-0.024</b> | <b>-0.002</b> | <b>0.005</b>  | <b>1.118</b> |
| 32 | 1.401         | 1.801         | 1.878         | 0.892         | 0.163         | 0.005         | 0.020         | 0.578         | 0.039         | 0.026         | 0.197        |
|    | <b>-0.092</b> | <b>-0.057</b> | <b>-0.066</b> | <b>0.388</b>  | <b>-0.831</b> | <b>0.001</b>  | <b>0.004</b>  | <b>0.457</b>  | <b>0.002</b>  | <b>0.001</b>  | <b>0.193</b> |
| 33 | 1.317         | 1.836         | 1.946         | 0.560         | 0.121         | 0.005         | 0.017         | 0.918         | 0.035         | 0.025         | 0.220        |
|    | <b>-0.176</b> | <b>-0.022</b> | <b>0.002</b>  | <b>0.055</b>  | <b>-0.872</b> | <b>0.000</b>  | <b>0.001</b>  | <b>0.797</b>  | <b>-0.002</b> | <b>0.001</b>  | <b>0.216</b> |
| 34 | 1.283         | 1.808         | 1.934         | 0.915         | 0.167         | 0.004         | 0.016         | 0.247         | 0.033         | 0.024         | 0.567        |
|    | <b>-0.210</b> | <b>-0.050</b> | <b>-0.010</b> | <b>0.411</b>  | <b>-0.826</b> | <b>0.000</b>  | <b>0.000</b>  | <b>0.126</b>  | <b>-0.004</b> | <b>0.000</b>  | <b>0.563</b> |
| 35 | 1.196         | 1.819         | 1.951         | 1.037         | 0.076         | 0.003         | 0.014         | 0.623         | 0.032         | 0.024         | 0.225        |
|    | <b>-0.297</b> | <b>-0.038</b> | <b>0.006</b>  | <b>0.532</b>  | <b>-0.917</b> | <b>-0.002</b> | <b>-0.002</b> | <b>0.502</b>  | <b>-0.005</b> | <b>0.000</b>  | <b>0.221</b> |
| 36 | 1.231         | 1.744         | 1.958         | 0.164         | 0.194         | 0.002         | 0.014         | 0.707         | 0.031         | 0.023         | 0.932        |
|    | <b>-0.262</b> | <b>-0.114</b> | <b>0.013</b>  | <b>-0.341</b> | <b>-0.799</b> | <b>-0.002</b> | <b>-0.002</b> | <b>0.586</b>  | <b>-0.006</b> | <b>-0.002</b> | <b>0.928</b> |
| 37 | 1.869         | 1.296         | 1.968         | 0.111         | 0.054         | 0.002         | 0.021         | 1.071         | 0.028         | 0.011         | 0.567        |
|    | <b>0.376</b>  | <b>-0.561</b> | <b>0.023</b>  | <b>-0.394</b> | <b>-0.939</b> | <b>-0.002</b> | <b>0.005</b>  | <b>0.950</b>  | <b>-0.009</b> | <b>-0.013</b> | <b>0.563</b> |
| 38 | 1.867         | 1.153         | 1.966         | 0.956         | 0.157         | 0.002         | 0.021         | 0.612         | 0.028         | 0.012         | 0.225        |
|    | <b>0.374</b>  | <b>-0.704</b> | <b>0.021</b>  | <b>0.452</b>  | <b>-0.837</b> | <b>-0.002</b> | <b>0.005</b>  | <b>0.491</b>  | <b>-0.009</b> | <b>-0.013</b> | <b>0.220</b> |
| 39 | 1.908         | 1.121         | 1.968         | 0.960         | 0.836         | 0.003         | 0.021         | 0.056         | 0.028         | 0.011         | 0.087        |
|    | <b>0.415</b>  | <b>-0.736</b> | <b>0.024</b>  | <b>0.455</b>  | <b>-0.157</b> | <b>-0.001</b> | <b>0.005</b>  | <b>-0.065</b> | <b>-0.010</b> | <b>-0.014</b> | <b>0.083</b> |
| 40 | 1.935         | 1.066         | 1.971         | 0.031         | 1.077         | 0.002         | 0.021         | 0.050         | 0.026         | 0.010         | 0.812        |
|    | <b>0.442</b>  | <b>-0.791</b> | <b>0.026</b>  | <b>-0.474</b> | <b>0.084</b>  | <b>-0.002</b> | <b>0.005</b>  | <b>-0.071</b> | <b>-0.011</b> | <b>-0.015</b> | <b>0.808</b> |
| 41 | 1.938         | 1.884         | 1.168         | 0.075         | 0.944         | 0.005         | 0.025         | 0.869         | 0.037         | 0.030         | 0.026        |
|    | <b>0.445</b>  | <b>0.026</b>  | <b>-0.777</b> | <b>-0.429</b> | <b>-0.049</b> | <b>0.001</b>  | <b>0.009</b>  | <b>0.748</b>  | <b>-0.001</b> | <b>0.005</b>  | <b>0.022</b> |
| 42 | 1.918         | 1.950         | 1.119         | 0.352         | 0.039         | 0.005         | 0.020         | 1.046         | 0.033         | 0.030         | 0.490        |
|    | <b>0.425</b>  | <b>0.092</b>  | <b>-0.826</b> | <b>-0.152</b> | <b>-0.955</b> | <b>0.000</b>  | <b>0.004</b>  | <b>0.925</b>  | <b>-0.005</b> | <b>0.005</b>  | <b>0.486</b> |
| 43 | 1.898         | 1.939         | 1.250         | 0.182         | 0.927         | 0.005         | 0.024         | 0.127         | 0.036         | 0.030         | 0.581        |
|    | <b>0.405</b>  | <b>0.081</b>  | <b>-0.694</b> | <b>-0.322</b> | <b>-0.067</b> | <b>0.001</b>  | <b>0.008</b>  | <b>0.007</b>  | <b>-0.001</b> | <b>0.005</b>  | <b>0.577</b> |
| 44 | 1.953         | 1.923         | 1.162         | 0.056         | 0.801         | 0.005         | 0.020         | 0.986         | 0.034         | 0.030         | 0.032        |

|    |              |               |               |               |               |              |              |               |               |              |              |
|----|--------------|---------------|---------------|---------------|---------------|--------------|--------------|---------------|---------------|--------------|--------------|
|    | <b>0.460</b> | <b>0.065</b>  | <b>-0.783</b> | <b>-0.449</b> | <b>-0.193</b> | <b>0.000</b> | <b>0.004</b> | <b>0.865</b>  | <b>-0.004</b> | <b>0.005</b> | <b>0.028</b> |
| 45 | 1.910        | 1.950         | 1.154         | 0.999         | 0.120         | 0.005        | 0.022        | 0.033         | 0.034         | 0.030        | 0.744        |
|    | <b>0.417</b> | <b>0.093</b>  | <b>-0.791</b> | <b>0.495</b>  | <b>-0.873</b> | <b>0.000</b> | <b>0.005</b> | <b>-0.087</b> | <b>-0.003</b> | <b>0.005</b> | <b>0.740</b> |
| 46 | 1.946        | 1.834         | 1.859         | 0.935         | 0.167         | 0.009        | 0.023        | 0.108         | 0.045         | 0.027        | 0.048        |
|    | <b>0.453</b> | <b>-0.024</b> | <b>-0.086</b> | <b>0.431</b>  | <b>-0.827</b> | <b>0.005</b> | <b>0.007</b> | <b>-0.013</b> | <b>0.008</b>  | <b>0.002</b> | <b>0.044</b> |
| 47 | 1.915        | 1.940         | 1.639         | 0.414         | 0.861         | 0.007        | 0.026        | 0.105         | 0.043         | 0.029        | 0.020        |

**Table S22.** Configurations with CI coefficient above 0.31 for 47 CASSCF reference states and types of transitions at the CASSCF level, relative to CAS state 1

| state | Transition              | Config. 1   | CI coef. | Config. 2   | CI coef. | Config. 3   | CI coef. |
|-------|-------------------------|-------------|----------|-------------|----------|-------------|----------|
| 1     |                         | u22du000000 | 0.5498   | u22ud000000 | -0.3571  |             |          |
| 2     | f-f                     | u220d00u000 | 0.5009   | u22du000000 | 0.3805   | 2220000u000 | -0.3333  |
| 3     |                         | u220d00000u | -0.6298  | 2220000000u | 0.3822   |             |          |
| 4     | L-L                     | 2u2du000000 | 0.7214   | 2u2ud000000 | -0.3939  |             |          |
| 5     | f-f, L-f                | u220d00u000 | -0.4854  | u22d000u000 | -0.4707  |             |          |
| 6     | L-L, f-f, L-f           | 2u20d00000u | -0.4881  | u220d00000u | -0.4254  | u22d000000u | -0.3167  |
| 7     | L-f, f-f                | 2u20d00u000 | -0.5664  | u22d000u000 | 0.4096   | 2u20u00d000 | 0.3258   |
| 8     | f-L, L-f, f-f           | 2u2d000u000 | 0.62622  | 2u2u000d000 | -0.3721  |             |          |
| 9     | f-f, L-f                | u22d000000u | -0.5714  | 2u20d00000u | 0.4342   |             |          |
| 10    | f-f, L-f                | u220000d00u | 0.5975   | u220000u00d | -0.3332  |             |          |
| 11    | L-f, f-f                | 22udu000000 | -0.4681  | 22u0d00u000 | 0.3478   |             |          |
| 12    | L-f, f-f                | 22u0d00u000 | -0.3718  | 22udu000000 | -0.3568  |             |          |
| 13    | L-f, f-f                | 2u20000d00u | -0.4678  | 22u0d00u000 | 0.3799   |             |          |
| 14    | f-L, L-f, f-f           | 22u0d00000u | -0.6790  |             |          |             |          |
| 15    | f-L, L-f, f-f           | 22ud000u000 | 0.6791   |             |          |             |          |
| 16    | f-f, L-f                | u2202000000 | -0.4125  | u22ud000000 | -0.3767  | 2u2d000000u | 0.3774   |
| 17    | f-L, L-f, f-f           | 2u2d000000u | 0.4714   | 2u20000d00u | 0.3528   |             |          |
| 18    | f-L, L-f, f-f           | 2u202000000 | -0.5418  | 2u2ud000000 | -0.5268  |             |          |
| 19    | f-f, L-f                | u220u00d000 | -0.4393  | u22u000d000 | 0.4126   | u220000u00d | -0.4106  |
| 20    | f-L, L-f, f-f           | 22u0000d00u | -0.5356  | 22ud000000u | 0.4552   | 22u0000u00d | 0.3201   |
| 21    | f-f, L-f                | u22u000000d | -0.4984  | u2200002000 | 0.3827   |             |          |
| 22    | f-L, L-f, f-f           | 22ud000000u | 0.4966   |             |          |             |          |
| 23    | f-L, L-f, f-f           | 2u20000u00d | -0.4080  | 2u20u00d000 | -0.3789  |             |          |
| 24    | f-L, L-f, f-f           | 2u200002000 | -0.3313  | 2u2u000000d | 0.3284   |             |          |
| 25    | f-L, L-f or L-L and f-f | 22u02000000 | 0.4328   | 22uud000000 | 0.3408   |             |          |
| 26    | f-f, L-f                | u22u000000d | 0.3196   | u2200000002 | -0.5549  |             |          |
| 27    | f-L, L-f, f-f           | 2u200000002 | -0.5470  | 2u2u000000d | 0.4514   |             |          |
| 28    | f-L, L-f, f-f           | 22uu000d000 | 0.4356   | 22u0000u00d | -0.3958  |             |          |
| 29    | f-L, L-f, f-f           | 22u00002000 | -0.4825  | 22uu000000d | 0.4466   |             |          |
| 30    | f-f                     | u22u000000d | -0.3972  | u2202000000 | 0.3481   | 2220u000000 | -0.3672  |
| 31    | f-L, L-f, f-f           | 22u00000002 | -0.5287  | 22uu000000d | 0.3726   |             |          |
| 32    | f-f                     | u2220000000 | 0.3773   | u220000u00d | -0.3401  |             |          |
| 33    | f-f                     | u22u000d000 | 0.3786   | u220000u00d | 0.3727   |             |          |
| 34    | f-f                     | u220u00000d | -0.4085  |             |          |             |          |
| 35    | f-f, L-f                | u220u00d000 | 0.4568   | u22u000d000 | 0.3998   | u2220000000 | -0.3229  |
| 36    | f-f, L-f                | u220u00000d | 0.4040   | u220u00d000 | -0.3720  |             |          |
| 37    | f-L, L-f, f-f           | 2u20000u00d | 0.4070   | 2u20u00000d | -0.3863  |             |          |
| 38    | f-L, L-f, f-f           | 2u220000000 | 0.4244   | u2220000000 | -0.3752  | 2u20u00d000 | -0.3333  |
| 39    | f-L, L-f, f-f           | 2u202000000 | -0.4851  |             |          |             |          |

|    |                              |             |         |             |         |             |        |
|----|------------------------------|-------------|---------|-------------|---------|-------------|--------|
| 40 | L-f, f-L                     | 2u20u00000d | -0.5464 | 2u20000u00d | -0.3676 |             |        |
| 41 | L-f, f-L                     | 22u00002000 | -0.4274 | 22uud000000 | -0.3303 | 22u02000000 | 0.3262 |
| 42 | f-L, L-f, f-f                | 22uu000d000 | -0.4380 | 22u0000u00d | -0.4353 |             |        |
| 43 | f-L, L-f, f-f<br>or L-L, f-f | 22u0u00000d | -0.4944 |             |         |             |        |
| 44 | f-L, L-f,                    | 22u0u00d000 | 0.5712  | 22uu000d000 | 0.3884  |             |        |
| 45 | f-f, f-L                     | 22u20000000 | -0.4721 | 22u00000002 | 0.3526  |             |        |
| 46 | f-L, f-f                     | 222u0000000 | 0.6591  |             |         |             |        |
| 47 | f-L                          | 2220u000000 | -0.5730 |             |         |             |        |

**Table S23.** Sum of the change in electrons for the f shell and ligand shells, relative to CAS 1 and CAS 3, along with the net total number of electrons excited in each CAS state.

|       | Relative to<br>CAS 1 |       |       | Relative to<br>CAS 3 |       |       |
|-------|----------------------|-------|-------|----------------------|-------|-------|
| state | sum f                | sum L | tot   | sum f                | sum L | tot   |
| 1     |                      |       |       |                      |       |       |
| 2     | 0.01                 | -0.01 | -0.93 |                      |       |       |
| 3     | 0.02                 | -0.01 | -0.99 |                      |       |       |
| 4     | 0.03                 | -0.01 | -0.64 | 0.01                 | 0.01  | -1.52 |
| 5     | 0.31                 | -0.30 | -1.00 | 0.30                 | -0.29 | -1.51 |
| 6     | 0.29                 | -0.27 | -1.35 | 0.27                 | -0.25 | -0.84 |
| 7     | 0.36                 | -0.34 | -1.08 | 0.35                 | -0.33 | -1.49 |
| 8     | 0.29                 | -0.27 | -1.77 | 0.28                 | -0.26 | -2.27 |
| 9     | 0.35                 | -0.33 | -1.04 | 0.33                 | -0.32 | -0.48 |
| 10    | 0.34                 | -0.35 | -1.45 | 0.32                 | -0.33 | -0.86 |
| 11    | 0.36                 | -0.38 | -1.27 | 0.35                 | -0.36 | -1.32 |
| 12    | 0.34                 | -0.35 | -1.28 | 0.32                 | -0.34 | -1.30 |
| 13    | 0.37                 | -0.38 | -1.59 | 0.36                 | -0.37 | -1.17 |
| 14    | 0.37                 | -0.38 | -1.48 | 0.36                 | -0.36 | -0.97 |
| 15    | 0.32                 | -0.33 | -1.73 | 0.31                 | -0.31 | -2.22 |
| 16    | 0.36                 | -0.36 | -0.59 | 0.35                 | -0.34 | -0.84 |
| 17    | 0.38                 | -0.36 | -1.18 | 0.36                 | -0.35 | -0.90 |
| 18    | 0.38                 | -0.36 | -1.11 | 0.37                 | -0.35 | -1.59 |
| 19    | 0.33                 | -0.33 | -1.37 | 0.32                 | -0.31 | -1.84 |
| 20    | 0.36                 | -0.36 | -2.34 | 0.34                 | -0.34 | -1.48 |
| 21    | 0.34                 | -0.34 | -1.34 | 0.32                 | -0.33 | -1.51 |
| 22    | 0.34                 | -0.36 | -1.60 | 0.33                 | -0.34 | -1.35 |
| 23    | 0.31                 | -0.31 | -1.64 | 0.30                 | -0.29 | -1.94 |
| 24    | 0.37                 | -0.37 | -1.72 | 0.35                 | -0.36 | -1.13 |
| 25    | 0.37                 | -0.38 | -1.08 | 0.35                 | -0.37 | -1.28 |
| 26    | 0.36                 | -0.35 | -1.27 | 0.34                 | -0.34 | -0.72 |
| 27    | 0.38                 | -0.36 | -1.88 | 0.36                 | -0.34 | -1.28 |
| 28    | 0.15                 | -0.15 | -1.60 | 0.13                 | -0.13 | -2.12 |
| 29    | 0.40                 | -0.40 | -2.25 | 0.38                 | -0.38 | -1.43 |
| 30    | 0.09                 | -0.10 | -0.43 | 0.08                 | -0.09 | -0.80 |

|    |       |       |       |       |       |       |
|----|-------|-------|-------|-------|-------|-------|
| 31 | 0.25  | -0.26 | -1.56 | 0.23  | -0.24 | -1.06 |
| 32 | 0.21  | -0.22 | -1.05 | 0.19  | -0.20 | -1.36 |
| 33 | 0.20  | -0.20 | -1.07 | 0.18  | -0.18 | -1.36 |
| 34 | 0.27  | -0.27 | -1.10 | 0.26  | -0.25 | -1.04 |
| 35 | 0.34  | -0.33 | -1.26 | 0.32  | -0.31 | -1.54 |
| 36 | 0.37  | -0.36 | -1.53 | 0.36  | -0.35 | -0.76 |
| 37 | 0.18  | -0.16 | -1.92 | 0.17  | -0.15 | -1.48 |
| 38 | 0.33  | -0.31 | -1.56 | 0.31  | -0.29 | -1.86 |
| 39 | 0.32  | -0.30 | -0.98 | 0.30  | -0.28 | -1.66 |
| 40 | 0.32  | -0.30 | -0.98 | 0.33  | -0.31 | -1.08 |
| 41 | 0.29  | -0.31 | -1.26 | 0.28  | -0.29 | -1.78 |
| 42 | 0.30  | -0.31 | -1.94 | 0.29  | -0.29 | -1.82 |
| 43 | 0.20  | -0.21 | -1.08 | 0.18  | -0.19 | -1.11 |
| 44 | 0.25  | -0.26 | -1.43 | 0.24  | -0.24 | -1.80 |
| 45 | 0.27  | -0.28 | -1.75 | 0.26  | -0.27 | -1.45 |
| 46 | -0.36 | 0.34  | -0.95 | -0.38 | 0.36  | -1.41 |
| 47 | -0.22 | 0.20  | -0.54 | -0.24 | 0.21  | -1.28 |

**Table S24.** Selected XMS-PDFT eigenvectors (columns) with coefficients of reference states larger than 0.31 (rows) for 47 state calculation

| CAS Ref. | XMS-PDFT State |       |       |      |       |       |       |       |       |       |       |       |    |       |    |    |    |    |       |       |
|----------|----------------|-------|-------|------|-------|-------|-------|-------|-------|-------|-------|-------|----|-------|----|----|----|----|-------|-------|
|          | 1              | 2     | 4     | 5    | 7     | 8     | 10    | 11    | 12    | 13    | 15    | 16    | 21 | 23    | 28 | 29 | 32 | 41 | 42    | 43    |
| 1        | 0.60           | -0.59 |       |      |       |       |       |       |       |       |       |       |    |       |    |    |    |    |       |       |
| 2        |                | 0.36  |       |      |       |       |       |       |       |       |       |       |    |       |    |    |    |    |       |       |
| 3        | 0.60           | 0.55  |       |      |       |       |       |       |       |       |       |       |    |       |    |    |    |    |       |       |
| 4        |                |       | 0.83  |      |       |       |       |       |       |       |       |       |    |       |    |    |    |    |       |       |
| 5        |                |       | -0.33 |      | -0.77 |       |       |       |       |       |       |       |    |       |    |    |    |    |       |       |
| 6        |                |       |       | 0.90 |       |       |       |       |       |       |       |       |    |       |    |    |    |    |       |       |
| 7        |                |       |       |      | -0.34 |       |       |       |       |       |       |       |    |       |    |    |    |    |       |       |
| 8        |                |       |       |      |       | -0.34 | 0.48  |       |       |       |       |       |    |       |    |    |    |    |       |       |
| 9        |                |       |       |      |       | -0.68 |       |       |       |       |       |       |    |       |    |    |    |    |       |       |
| 10       |                |       |       |      |       | -0.35 | -0.50 |       | -0.31 |       |       |       |    |       |    |    |    |    |       |       |
| 11       |                |       |       |      |       |       | 0.33  |       |       | -0.45 | -0.34 |       |    |       |    |    |    |    |       |       |
| 12       |                |       |       |      |       |       |       |       | -0.33 | 0.36  |       |       |    |       |    |    |    |    |       |       |
| 13       |                |       |       |      |       |       |       |       |       | 0.38  |       | 0.37  |    |       |    |    |    |    |       |       |
| 14       |                |       |       |      |       |       |       |       |       |       |       | -0.47 |    |       |    |    |    |    |       |       |
| 15       |                |       |       |      |       |       |       | 0.44  | 0.40  |       |       |       |    |       |    |    |    |    |       |       |
| 16       |                |       |       |      |       |       |       | 0.53  |       |       | -0.43 | -0.35 |    |       |    |    |    |    |       |       |
| 17       |                |       |       |      |       |       |       |       |       |       | -0.54 |       |    |       |    |    |    |    |       |       |
| 18       |                |       |       |      |       |       |       |       |       |       | 0.35  |       |    | -0.34 |    |    |    |    |       |       |
| 19       |                |       |       |      |       |       |       |       |       |       |       | -0.39 |    |       |    |    |    |    |       |       |
| 20       |                |       |       |      |       |       |       | -0.33 | -0.59 | -0.41 |       |       |    |       |    |    |    |    |       |       |
| 21       |                |       |       |      |       |       |       |       |       |       |       |       |    |       |    |    |    |    | -0.62 |       |
| 25       |                |       |       |      |       |       |       |       |       |       |       |       |    |       |    |    |    |    |       | -0.86 |
| 26       |                |       |       |      |       |       |       |       |       |       |       |       |    |       |    |    |    |    | 0.45  |       |





|    |  |  |  |  |  |  |  |  |  |  |  |  |  |  |  |  |  |  |  |      |      |
|----|--|--|--|--|--|--|--|--|--|--|--|--|--|--|--|--|--|--|--|------|------|
| 44 |  |  |  |  |  |  |  |  |  |  |  |  |  |  |  |  |  |  |  | 0.25 | 0.25 |
|----|--|--|--|--|--|--|--|--|--|--|--|--|--|--|--|--|--|--|--|------|------|

**Table S26.** Selected Natural Orbital occupations for states from 43 SA-CASSCF calculation

| CAS ref. | L1    | P1    | L2    | F1    | F2    | L3    | L4    | L5    | L6    | F3    | F4    |
|----------|-------|-------|-------|-------|-------|-------|-------|-------|-------|-------|-------|
| 1        | 1.922 | 1.992 | 1.325 | 0.147 | 0.853 | 0.008 | 0.016 | 0.050 | 0.000 | 0.532 | 0.154 |
| 2        | 1.923 | 1.992 | 1.268 | 0.780 | 0.220 | 0.008 | 0.016 | 0.050 | 0.000 | 0.516 | 0.226 |
| 37       | 1.082 | 1.992 | 1.004 | 0.438 | 0.563 | 0.009 | 0.003 | 0.001 | 0.930 | 0.543 | 0.436 |
| 38       | 1.080 | 1.992 | 1.001 | 0.587 | 0.410 | 0.009 | 0.004 | 0.001 | 0.934 | 0.571 | 0.413 |
| 39       | 1.158 | 1.992 | 1.055 | 0.621 | 0.353 | 0.009 | 0.002 | 0.002 | 0.845 | 0.581 | 0.382 |
| 40       | 1.159 | 1.992 | 1.048 | 0.592 | 0.389 | 0.009 | 0.003 | 0.001 | 0.842 | 0.557 | 0.409 |

**Table S27.** Selected Configurations from 43 SA-CASSCF calculation with CI coefficients above 0.31, and M diagnostic values

| state | Transition | Config. 1   | CI coef. | Config. 2   | CI coef. | Config. 3   | CI coef. | M    |
|-------|------------|-------------|----------|-------------|----------|-------------|----------|------|
| 1     |            | 22u0d0000u0 | -0.6769  |             |          |             |          | 0.58 |
| 2     |            | 22u02000000 | -0.4311  | 2220u000000 | 0.4243   |             |          | 0.64 |
| 37    | L-F, L-f   | 0220u000du0 | -0.4084  | 2200u000du0 | 0.4067   | 220u0000d0u | -0.3974  | 1.52 |
| 38    | L-F, L-f   | 220u0000du0 | -0.4365  | 022u0000du0 | 0.4387   | 2200u000d0u | -0.3665  | 1.49 |
| 39    | L-F, L-f   | u2u0d000du0 | -0.4448  | u2ud0000du0 | 0.4004   | u2ud0000d0u | 0.3756   | 1.03 |
| 40    | L-F, L-f   | u2ud0000du0 | 0.4397   | u2u0d000du0 | 0.4081   | u2u0d000d0u | 0.3773   | 0.82 |

**Table S28.** XMS-PDFT total energies (hartrees) for 47 state and 43 state calculations

| State | Energy (hartrees) | Energy (hartrees) |
|-------|-------------------|-------------------|
| 1     | -11788.047708     | -11788.016297     |
| 2     | -11788.045444     | -11788.009104     |
| 3     | -11788.012091     | -11788.004201     |
| 4     | -11788.005247     | -11788.003882     |
| 5     | -11787.995917     | -11788.000009     |
| 6     | -11787.991617     | -11787.996431     |
| 7     | -11787.987442     | -11787.995249     |
| 8     | -11787.984571     | -11787.993850     |
| 9     | -11787.983081     | -11787.990595     |
| 10    | -11787.980514     | -11787.990170     |
| 11    | -11787.976362     | -11787.984791     |
| 12    | -11787.971225     | -11787.983211     |
| 13    | -11787.970693     | -11787.977845     |
| 14    | -11787.969459     | -11787.976346     |
| 15    | -11787.968946     | -11787.971466     |
| 16    | -11787.965677     | -11787.965159     |
| 17    | -11787.963439     | -11787.963514     |
| 18    | -11787.963206     | -11787.959236     |
| 19    | -11787.962093     | -11787.955712     |

|    |               |               |
|----|---------------|---------------|
| 20 | -11787.959574 | -11787.955113 |
| 21 | -11787.954261 | -11787.940402 |
| 22 | -11787.951204 | -11787.938066 |
| 23 | -11787.949004 | -11787.932953 |
| 24 | -11787.945704 | -11787.927580 |
| 25 | -11787.940032 | -11787.926503 |
| 26 | -11787.938812 | -11787.923041 |
| 27 | -11787.936910 | -11787.922871 |
| 28 | -11787.936007 | -11787.920308 |
| 29 | -11787.933806 | -11787.914573 |
| 30 | -11787.931666 | -11787.913363 |
| 31 | -11787.929437 | -11787.830828 |
| 32 | -11787.925214 | -11787.822648 |
| 33 | -11787.921729 | -11787.816279 |
| 34 | -11787.919261 | -11787.813407 |
| 35 | -11787.918009 | -11787.800379 |
| 36 | -11787.914304 | -11787.799099 |
| 37 | -11787.911699 | -11787.791346 |
| 38 | -11787.910130 | -11787.791232 |
| 39 | -11787.905839 | -11787.790362 |
| 40 | -11787.902661 | -11787.789582 |
| 41 | -11787.900936 | -11787.789310 |
| 42 | -11787.899042 | -11787.783047 |
| 43 | -11787.897863 | -11787.781664 |
| 44 | -11787.885778 |               |
| 45 | -11787.883030 |               |
| 46 | -11787.804056 |               |
| 47 | -11787.800336 |               |

**Table S29.** Cartesian coordinates of the computed **1-Ln(NP\*)** and **2-Ln(NP\*)**, Ln=Pr, Nd, Dy, complexes at the DFT level.

| <b>1-Pr(NP*)</b> |             |             |             | <b>2-Pr(NP*)</b> |             |             |             |
|------------------|-------------|-------------|-------------|------------------|-------------|-------------|-------------|
| Pr               | 0.02207800  | -0.03618300 | -0.00959200 | Pr               | -0.01104900 | 0.00112100  | 0.00141000  |
| P                | 0.50414500  | 2.80784000  | -2.58774900 | P                | 1.10840700  | 0.03480800  | -3.54860800 |
| P                | 3.26601600  | -2.13702600 | 0.17806100  | N                | 2.73671500  | -0.34878400 | -3.76475400 |
| P                | -0.74661400 | 1.68284200  | 3.35107000  | N                | 0.78622900  | 1.31662300  | -4.62160400 |
| P                | -3.01238700 | -2.25541700 | -0.83386700 | N                | 0.73342000  | 0.17294300  | -2.04263900 |
| N                | -0.50537700 | 0.90701100  | 2.04793300  | N                | 0.24592400  | -1.06424400 | -4.55221900 |
| N                | 0.32737300  | 1.65089900  | -1.59285800 | C                | 3.60075700  | -0.69812200 | -2.65293700 |
| N                | 3.20159500  | -3.54957600 | 1.14758100  | H                | 3.83347200  | -1.77342300 | -2.67265300 |
| N                | -0.28289900 | 0.82466300  | 4.74964100  | H                | 3.02240600  | -0.52640000 | -1.74286300 |
| N                | 1.96612800  | -1.32118600 | 0.19393700  | C                | 4.90135500  | 0.09156000  | -2.60435200 |
| N                | -1.72385700 | -1.44275200 | -0.65131500 | H                | 5.48362400  | -0.20659500 | -1.72794600 |
| N                | 3.94868500  | -2.74676900 | -1.30571000 | H                | 4.71397200  | 1.16501900  | -2.53392300 |
| N                | 0.16747500  | 2.37727600  | -4.20228300 | H                | 5.53041400  | -0.08418800 | -3.48235800 |
| C                | 3.07624800  | -3.26958300 | -2.37902200 | C                | 1.28148300  | 2.70064400  | -4.55831200 |

|   |             |             |             |   |             |             |             |
|---|-------------|-------------|-------------|---|-------------|-------------|-------------|
| N | 1.99215200  | 3.67600400  | -2.67362500 | C | 1.79359500  | 3.13179300  | -5.93706900 |
| N | -2.32451500 | 2.31683000  | 3.75426500  | H | 2.57453500  | 2.45414500  | -6.29322400 |
| N | -2.94866100 | -3.31961300 | -2.17790300 | H | 2.21951900  | 4.13757100  | -5.87797400 |
| N | -3.65444200 | -3.25100700 | 0.44785500  | H | 0.99722300  | 3.15978200  | -6.68597900 |
| N | 4.77900400  | -1.41403400 | 0.58070100  | C | -0.08138000 | -2.45114400 | -4.16514000 |
| N | -0.36487100 | 4.30850800  | -2.43258500 | C | 2.43068300  | 2.82306600  | -3.56360100 |
| N | -0.05552600 | 3.23327200  | 3.60877300  | H | 2.14576600  | 2.45212000  | -2.57740900 |
| C | 5.01373800  | -1.85363700 | -1.72520300 | H | 2.71241600  | 3.87521200  | -3.46429600 |
| H | 4.63214200  | -0.92827700 | -2.18331400 | H | 3.30631400  | 2.26788400  | -3.90196800 |
| H | 5.67466400  | -2.34065300 | -2.44857500 | C | -0.76544000 | -0.33321100 | -5.29423800 |
| C | 3.32504300  | 3.06778200  | -2.61756300 | H | -1.64914000 | -0.10243500 | -4.67993700 |
| C | -4.40893000 | -4.51441800 | -3.82403900 | H | -1.09994400 | -0.90147300 | -6.16637900 |
| H | -4.68654900 | -3.57759000 | -4.31556700 | C | 0.14990700  | 3.63311100  | -4.11898800 |
| H | -5.26755800 | -5.19344600 | -3.87288700 | H | -0.70601200 | 3.57998900  | -4.79826100 |
| H | -3.60093200 | -4.97065400 | -4.40246700 | H | 0.48844200  | 4.67421200  | -4.09715000 |
| C | -0.03348600 | -0.60068000 | 4.68611100  | H | -0.19136000 | 3.35470700  | -3.12126700 |
| H | 0.02190000  | -0.85274800 | 3.62467000  | C | -0.08221000 | 0.94998700  | -5.72032500 |
| H | -0.88154600 | -1.17186500 | 5.10050500  | H | 0.48801100  | 0.78493800  | -6.64854400 |
| C | 4.41323900  | -4.28503900 | 1.45743800  | H | -0.82456200 | 1.72983100  | -5.92249300 |
| H | 4.40327000  | -4.53505600 | 2.52965600  | C | -0.10335100 | -3.31342600 | -5.43197300 |
| H | 5.27237000  | -3.62256100 | 1.31453200  | H | -0.88310300 | -3.00291800 | -6.13293500 |
| C | 2.00548600  | -4.17729300 | -1.77658100 | H | -0.30000000 | -4.35850400 | -5.17434400 |
| H | 2.45562500  | -4.99629700 | -1.21302900 | H | 0.85801200  | -3.26134000 | -5.94937300 |
| H | 1.39286800  | -4.59990500 | -2.57866800 | C | 3.30380800  | -0.39230500 | -5.10128000 |
| H | 1.34879400  | -3.61876100 | -1.10674500 | H | 4.06298400  | 0.39762100  | -5.20863100 |
| N | -4.54290000 | -1.49469000 | -1.00831400 | H | 2.51020900  | -0.14525400 | -5.80826900 |
| C | 2.39488000  | -2.14863900 | -3.17183000 | C | 0.98635100  | -3.01406500 | -3.23097700 |
| H | 1.80777800  | -1.51732700 | -2.50250600 | H | 1.02428200  | -2.46637800 | -2.28715500 |
| H | 1.72802200  | -2.56575700 | -3.93237800 | H | 1.97689700  | -2.98086400 | -3.68683800 |
| H | 3.12131600  | -1.51460700 | -3.68864200 | H | 0.75170000  | -4.05768600 | -3.00635300 |
| C | 5.10303900  | -0.66614500 | 1.79840900  | C | 3.91641400  | -1.72887300 | -5.49481900 |
| C | 5.77371600  | -1.51502900 | -0.45767100 | H | 4.72822000  | -2.02741700 | -4.82552200 |
| H | 6.51691800  | -2.30250100 | -0.24047300 | H | 4.33381100  | -1.66495900 | -6.50435200 |
| H | 6.32333100  | -0.57416500 | -0.58908200 | C | 3.16674600  | -2.52325000 | -5.49187500 |
| C | 3.29921800  | 1.66750800  | -3.22799800 | H | -1.44082300 | -2.53791700 | -3.46758100 |
| H | 2.62987600  | 1.00993300  | -2.67049300 | H | -1.47730100 | -1.89079100 | -2.58692500 |
| H | 4.30638600  | 1.24022100  | -3.19727200 | H | -1.63374800 | -3.56542700 | -3.14774400 |
| H | 2.97014300  | 1.69276800  | -4.26909600 | H | -2.25881200 | -2.25115100 | -4.13581700 |
| C | 0.23472600  | 3.35612700  | -5.26557500 | P | 1.08782000  | 3.06046200  | 1.82120200  |
| H | 0.34360500  | 4.33768700  | -4.80126400 | N | 0.97127200  | 4.47856500  | 0.91543100  |
| H | -0.72921100 | 3.38977600  | -5.79807600 | N | 0.53937200  | 3.46079400  | 3.38218100  |
| C | -4.01258900 | -4.28167600 | -2.37171300 | N | 0.47303000  | 1.83752100  | 1.07653500  |
| H | -4.88370700 | -3.93144900 | -1.81535300 | N | 2.71592100  | 3.00487900  | 2.37137200  |
| H | -3.74188700 | -5.25458400 | -1.92225500 | C | 0.53500400  | 4.47629100  | -0.46839000 |
| C | 2.08513900  | -3.74673400 | 2.04869100  | H | 1.38301600  | 4.69032900  | -1.13610000 |
| H | 1.28069200  | -3.09458400 | 1.70251100  | H | 0.21793600  | 3.45605900  | -0.69304500 |
| H | 2.34540400  | -3.40884700 | 3.06838400  | C | -0.59330100 | 5.45371000  | -0.76727400 |
| C | -5.51727200 | -1.90264400 | -0.02516000 | H | -0.87955900 | 5.37873200  | -1.82008900 |
| H | -6.23265700 | -2.63825600 | -0.43338900 | H | -1.47721900 | 5.23958600  | -0.16293500 |
| H | -6.10121100 | -1.05137200 | 0.34517000  | H | -0.30464400 | 6.49366200  | -0.58658200 |
| C | -0.03033200 | 0.99112900  | -4.57246000 | C | -0.82673800 | 3.80811300  | 3.80475600  |
| H | -0.18415900 | 0.44190300  | -3.64047900 | C | -0.79352200 | 5.05884300  | 4.69004300  |
| H | 0.87994100  | 0.56845700  | -5.03093800 | H | -0.32432700 | 5.89603300  | 4.16581300  |
| C | -2.54396300 | 3.27020700  | -2.86592300 | H | -1.81270200 | 5.35416500  | 4.95557400  |
| H | -2.40847000 | 3.41739300  | -3.94000000 | H | -0.24982100 | 4.89189600  | 5.62407500  |
| H | -3.61181500 | 3.33027100  | -2.63699600 | C | 3.84606600  | 2.51844000  | 1.55483000  |
| H | -2.19874900 | 2.26807300  | -2.60715100 | C | -1.71323800 | 4.10102200  | 2.59910500  |
| C | -2.78578200 | -4.08046900 | 1.29909100  | H | -1.70909600 | 3.27139200  | 1.88961800  |
| C | -1.32619800 | 0.98855100  | 7.03134400  | H | -2.74196700 | 4.25651800  | 2.93632000  |
| H | -2.32324400 | 1.24715700  | 6.66876800  | H | -1.38717000 | 5.00216000  | 2.07860000  |
| H | -1.18395700 | 1.46869700  | 8.00609000  | C | 2.72660300  | 2.66023900  | 3.78183200  |
| H | -1.28996700 | -0.09391100 | 7.19088500  | H | 2.56709800  | 1.58435400  | 3.95038500  |

|   |             |             |             |   |             |             |             |
|---|-------------|-------------|-------------|---|-------------|-------------|-------------|
| C | -1.79410500 | 4.33604400  | -2.07184800 | H | 3.67693500  | 2.93697700  | 4.24617700  |
| C | 1.86510200  | 5.08650300  | -2.38966900 | C | -1.43533100 | 2.64323300  | 4.58950500  |
| H | 1.96149200  | 5.69285200  | -3.30630200 | H | -0.83273800 | 2.38494300  | 5.46518000  |
| H | 2.63415500  | 5.43384400  | -1.68913300 | H | -2.44013000 | 2.89501900  | 4.94428600  |
| C | 2.25202700  | 2.39222500  | 3.50187000  | H | -1.50015900 | 1.76155400  | 3.95074400  |
| H | 2.21696800  | 2.02682000  | 4.53089500  | C | 1.58477600  | 3.45356400  | 4.38376200  |
| H | 3.28117200  | 2.67963000  | 3.26913700  | H | 1.92015400  | 4.47501500  | 4.62493500  |
| H | 1.96615600  | 1.57339400  | 2.83915400  | H | 1.24491900  | 2.98837800  | 5.31551900  |
| C | -2.11791200 | -3.26718200 | 2.41278400  | C | 5.10593900  | 3.28799000  | 1.96630400  |
| H | -1.56655100 | -2.42718200 | 1.98466100  | H | 5.38510700  | 3.10255400  | 3.00720500  |
| H | -1.42123200 | -3.88920100 | 2.98438700  | H | 5.95456400  | 2.98289900  | 1.34654300  |
| H | -2.85268900 | -2.86828000 | 3.11805500  | H | 4.95753000  | 4.36364700  | 1.84148400  |
| C | 1.24450000  | -1.04066800 | 5.38595600  | C | 1.36495300  | 5.74962500  | 1.49788800  |
| H | 1.20113900  | -0.89847000 | 6.47115900  | H | 0.48541900  | 6.40548200  | 1.58796500  |
| H | 2.10932800  | -0.49264600 | 5.00516200  | H | 1.70354000  | 5.55809300  | 2.51742400  |
| H | 1.41697400  | -2.10605800 | 5.20484200  | C | 3.59214100  | 2.78690100  | 0.07383500  |
| C | -1.66152500 | -3.64921500 | -2.76385200 | H | 2.72671700  | 2.23120100  | -0.29296700 |
| H | -1.56498700 | -4.74526000 | -2.82011700 | H | 3.42653600  | 3.84771400  | -0.11971900 |
| H | -0.88226000 | -3.29272900 | -2.08765900 | H | 4.46531600  | 2.46972700  | -0.50210200 |
| C | 4.63571800  | -5.54913000 | 0.63511400  | C | 2.46179500  | 6.48848700  | 0.74455700  |
| H | 3.81500800  | -6.26204600 | 0.74667800  | H | 2.17540500  | 6.72040500  | -0.28512300 |
| H | 5.56294300  | -6.04871100 | 0.94138000  | H | 2.68182900  | 7.43770200  | 1.24268000  |
| H | 4.72037200  | -5.28788100 | -0.42131800 | H | 3.38395300  | 5.90367100  | 0.71547300  |
| C | 3.92476600  | -4.11752500 | -3.33343300 | C | 4.07899100  | 1.01842200  | 1.74942500  |
| H | 4.65300200  | -3.51951100 | -3.88871300 | H | 3.17965400  | 0.44312200  | 1.51286200  |
| H | 3.27901800  | -4.60351700 | -4.07140500 | H | 4.88752400  | 0.67684600  | 1.09749500  |
| H | 4.46482000  | -4.89525900 | -2.78555700 | H | 4.37476900  | 0.78393100  | 2.77673400  |
| C | -3.54756900 | 1.52928600  | 3.51008600  | P | -3.73288300 | -0.28683400 | -0.17408500 |
| C | 6.49780800  | -1.05929400 | 2.30270000  | N | -4.52837500 | 0.18804100  | 1.23573400  |
| H | 6.55796800  | -2.13381500 | 2.49858700  | N | -4.53428000 | -1.68959000 | -0.70990600 |
| H | 6.71722500  | -0.53332500 | 3.23711800  | N | -2.18409900 | -0.29776200 | 0.00298600  |
| H | 7.28416000  | -0.79841900 | 1.58808400  | N | -4.44638400 | 0.64249000  | -1.43377700 |
| C | 1.33505200  | 3.59836800  | 3.31844600  | C | -3.81407100 | 0.70980700  | 2.38581500  |
| C | -4.94001800 | -0.49871700 | -2.00973000 | H | -3.99134500 | 1.79106900  | 2.48756100  |
| C | 4.09485000  | -0.97628900 | 2.90149500  | H | -2.75015400 | 0.59219900  | 2.17090700  |
| H | 3.07264300  | -0.78278300 | 2.56901500  | C | -4.16165500 | 0.02237300  | 3.69892400  |
| H | 4.30043600  | -0.34452100 | 3.77070100  | H | -3.56768000 | 0.45161400  | 4.51061500  |
| H | 4.16180300  | -2.02015400 | 3.21790800  | H | -3.94945100 | -1.04804800 | 3.65699300  |
| C | -2.36536300 | 3.71141500  | 3.35520100  | H | -5.21424200 | 0.14741800  | 3.97082700  |
| H | -2.48908100 | 3.83647900  | 2.26833600  | C | -4.55037600 | -3.02175100 | -0.08524100 |
| H | -3.18531300 | 4.24081500  | 3.85043600  | C | -5.98746300 | -3.55165200 | -0.03241500 |
| C | 0.49016700  | 5.27744400  | -1.77362300 | H | -6.63868100 | -2.86106400 | 0.51062300  |
| H | 0.54665400  | 5.11821600  | -0.68599800 | H | -6.01027800 | -4.51536200 | 0.48447500  |
| H | 0.13426100  | 6.29798300  | -1.94571700 | H | -6.40913000 | -3.70734600 | -1.02925900 |
| C | -3.88314200 | -0.36743000 | -3.10189900 | C | -4.06068300 | 2.03253800  | -1.75067400 |
| H | -2.90752200 | -0.12105000 | -2.67800500 | C | -4.01142200 | -2.96219900 | 1.33998700  |
| H | -4.17560800 | 0.42941900  | -3.79194900 | H | -3.01525300 | -2.51703900 | 1.37159900  |
| H | -3.77759500 | -1.29593900 | -3.66383600 | H | -3.94496900 | -3.97630100 | 1.74403100  |
| C | 4.30857600  | 3.92346500  | -3.42396200 | H | -4.66989900 | -2.38154700 | 1.98701200  |
| H | 3.97511400  | 4.02951800  | -4.46032800 | C | -4.73670200 | -0.23021500 | -2.55746000 |
| H | 5.29670800  | 3.45270200  | -3.42956800 | H | -3.83869700 | -0.46083000 | -3.15078300 |
| H | 4.42682100  | 4.92638100  | -3.00321700 | H | -5.47499200 | 0.22188000  | -3.22509800 |
| C | -1.02781000 | 4.28739000  | 3.78457800  | C | -3.68053200 | -3.98307400 | -0.89925300 |
| H | -0.78904800 | 5.16721100  | 3.17521300  | H | -4.02105800 | -4.05937500 | -1.93595700 |
| H | -1.07592400 | 4.61950600  | 4.83592900  | H | -3.70529500 | -4.99004700 | -0.46990900 |
| C | -3.63020100 | -5.20048300 | 1.91830200  | H | -2.64837500 | -3.63101800 | -0.90655100 |
| H | -4.37751400 | -4.82020800 | 2.62058500  | C | -5.28373900 | -1.49772100 | -1.93368800 |
| H | -2.98790700 | -5.89039100 | 2.47476400  | H | -6.36159900 | -1.38643000 | -1.73414600 |
| H | -4.14833200 | -5.76337400 | 1.13636600  | H | -5.15962800 | -2.34484000 | -2.61717900 |
| C | 5.07920200  | 0.83766500  | 1.51181000  | C | -5.29269800 | 2.76279900  | -2.29628800 |
| H | 5.78318600  | 1.10271200  | 0.71705300  | H | -5.65098400 | 2.33034900  | -3.23457400 |
| H | 5.35400700  | 1.41447100  | 2.40175900  | H | -5.05240400 | 3.81120200  | -2.49667100 |

|   |             |             |             |   |             |             |             |
|---|-------------|-------------|-------------|---|-------------|-------------|-------------|
| H | 4.08110500  | 1.14007400  | 1.19402600  | H | -6.11145400 | 2.72931900  | -1.57286500 |
| C | -0.25901100 | 1.45856500  | 6.04989600  | C | -5.97837700 | 0.13745600  | 1.30673600  |
| H | -0.36078900 | 2.53392500  | 5.89303600  | H | -6.28727600 | -0.59968200 | 2.06357300  |
| H | 0.73339400  | 1.31707900  | 6.50585800  | H | -6.34567900 | -0.24035500 | 0.35120700  |
| C | 1.35004500  | 3.13760800  | -6.28086900 | C | -3.59996800 | 2.76245800  | -0.49156500 |
| H | 1.30800100  | 3.90392300  | -7.06292600 | H | -2.69543200 | 2.31427600  | -0.07547700 |
| H | 1.27398600  | 2.16290600  | -6.77298600 | H | -4.37134200 | 2.75873500  | 0.27999000  |
| H | 2.32999900  | 3.19613200  | -5.80249900 | H | -3.37622600 | 3.80262100  | -0.74214800 |
| C | -5.12336800 | 0.87206100  | -1.34788700 | C | -6.65351100 | 1.46884800  | 1.60350900  |
| H | -5.87639900 | 0.84639700  | -0.55478500 | H | -6.33123000 | 1.89481000  | 2.55783700  |
| H | -5.44869700 | 1.61560500  | -2.08331900 | H | -7.73809100 | 1.33327200  | 1.65748800  |
| H | -4.18190100 | 1.20719700  | -0.90966900 | H | -6.44597300 | 2.20041900  | 0.81938200  |
| C | -6.25996600 | -0.92476600 | -2.66585600 | C | -2.93717800 | 2.08517400  | -2.78840600 |
| H | -6.16334100 | -1.91577800 | -3.11861400 | H | -2.05979400 | 1.52610000  | -2.45199100 |
| H | -6.53829100 | -0.21554300 | -3.45165900 | H | -2.63784800 | 3.12156300  | -2.96543300 |
| H | -7.08489400 | -0.95810400 | -1.94719500 | H | -3.25523600 | 1.67431200  | -3.75161300 |
| C | -1.70594600 | -4.73493500 | 0.44167100  | P | 1.53778800  | -2.80350500 | 1.90042900  |
| H | -2.14814200 | -5.29852900 | -0.38375000 | N | 0.82224200  | -4.30486000 | 1.61641600  |
| H | -1.12290500 | -5.42808900 | 1.05266800  | N | 3.21518000  | -3.08917400 | 1.95146000  |
| H | -1.02232900 | -3.98870500 | 0.03254300  | N | 0.96882400  | -1.69735200 | 0.96248400  |
| C | -2.01752100 | 4.09805100  | -0.57408300 | N | 1.48828400  | -2.59606300 | 3.60767700  |
| H | -1.56717600 | 3.15223400  | -0.26507700 | C | -0.32374900 | -4.46033200 | 0.74033200  |
| H | -3.08835800 | 4.06950900  | -0.34596600 | H | -1.23061900 | -4.66495600 | 1.32914000  |
| H | -1.57549000 | 4.89706900  | 0.02973200  | H | -0.48200800 | -3.49272200 | 0.26014300  |
| C | -3.32381900 | 0.08418900  | 3.94919700  | C | -0.15915200 | -5.54698500 | -0.31304400 |
| H | -2.55708800 | -0.39398400 | 3.33707000  | H | -1.04780700 | -5.58366300 | -0.94939600 |
| H | -4.25367800 | -0.48036400 | 3.82933300  | H | 0.70464800  | -5.35497000 | -0.95287200 |
| H | -3.02126100 | 0.02619500  | 4.99596600  | H | -0.03836500 | -6.54151100 | 0.12707900  |
| C | 1.46262600  | 4.11493300  | 1.88162400  | C | 4.10434800  | -3.48799400 | 0.84871800  |
| H | 1.14146100  | 3.34714900  | 1.17373600  | C | 4.99500200  | -4.65300200 | 1.29443500  |
| H | 2.49620900  | 4.39460700  | 1.65023800  | H | 4.39115500  | -5.50030500 | 1.63092900  |
| H | 0.83933100  | 5.00191200  | 1.72554700  | H | 5.61364800  | -4.98971800 | 0.45751300  |
| C | -2.37538400 | 5.69965800  | -2.46354500 | H | 5.67178100  | -4.37131300 | 2.10591300  |
| H | -1.97075900 | 6.51649300  | -1.85910100 | C | 0.30290700  | -2.11344700 | 4.34420900  |
| H | -3.45999500 | 5.69811900  | -2.31681200 | C | 3.29919100  | -3.94002100 | -0.36454400 |
| H | -2.16946600 | 5.91503200  | -3.51626300 | H | 2.58657800  | -3.17500200 | -0.67788000 |
| C | 3.80359300  | 2.95920400  | -1.16743900 | H | 3.97995000  | -4.13450800 | -1.19820700 |
| H | 3.84535800  | 3.93981900  | -0.68203700 | H | 2.74953900  | -4.85822000 | -0.15402500 |
| H | 4.80478500  | 2.52007400  | -1.11130200 | C | 2.78269400  | -2.12080800 | 4.06231100  |
| H | 3.11423800  | 2.32724500  | -0.60511500 | H | 2.92533100  | -1.04649900 | 3.86930400  |
| C | -4.72519100 | -2.52848000 | 1.10527200  | H | 2.90909200  | -2.29067000 | 5.13497800  |
| H | -4.35262400 | -1.74179100 | 1.77920600  | C | 4.98182800  | -2.30163100 | 0.44113000  |
| H | -5.35982800 | -3.20240600 | 1.68928400  | H | 5.58084400  | -1.93298200 | 1.27888200  |
| C | 1.78734700  | 4.68324800  | 4.30269900  | H | 5.67402300  | -2.58527100 | -0.35846800 |
| H | 1.21605700  | 5.60963400  | 4.19239200  | H | 4.35428700  | -1.48290600 | 0.08709900  |
| H | 2.84083800  | 4.92622500  | 4.13258000  | C | 3.79110300  | -2.92667200 | 3.26973000  |
| H | 1.67930800  | 4.33674100  | 5.33508500  | H | 3.96493300  | -3.89906600 | 3.75769900  |
| C | 1.60701400  | -5.18920000 | 2.12638300  | H | 4.75173700  | -2.40187000 | 3.22607100  |
| H | 0.73488800  | -5.25990700 | 2.78451500  | C | 0.30473500  | -2.75545100 | 5.73587500  |
| H | 2.37418100  | -5.85530700 | 2.53456200  | H | 1.17041000  | -2.45373100 | 6.33202200  |
| H | 1.32226200  | -5.56336200 | 1.13979700  | H | -0.58867600 | -2.45525900 | 6.29176200  |
| C | -1.41295800 | -3.02687600 | -4.13177900 | H | 0.31094700  | -3.84558500 | 5.65675300  |
| H | -2.19322600 | -3.27418700 | -4.85606300 | C | 1.31248500  | -5.48661400 | 2.30413100  |
| H | -0.45494900 | -3.36839500 | -4.53965700 | H | 1.73881500  | -6.19081200 | 1.57324000  |
| H | -1.36831800 | -1.94012400 | -4.03952100 | H | 2.14091200  | -5.17937700 | 2.94471400  |
| C | -1.20563600 | 0.76861800  | -5.51467500 | H | -0.98015100 | -2.53449000 | 3.63261100  |
| H | -2.13359100 | 1.15419200  | -5.08598600 | C | -1.06093400 | -2.07602000 | 2.64499200  |
| H | -1.33913400 | -0.30099600 | -5.69937800 | H | -1.03698400 | -3.61743500 | 3.51361600  |
| H | -1.05815500 | 1.24835200  | -6.48811400 | H | -1.84071500 | -2.21288200 | 4.22484700  |
| C | -3.95776000 | 1.52751800  | 2.03460100  | C | 0.27796700  | -6.21400000 | 3.15112400  |
| H | -4.18626700 | 2.53447000  | 1.67232400  | H | -0.57765300 | -6.55458500 | 2.56119600  |
| H | -4.85511800 | 0.91784800  | 1.88757800  | H | 0.72850900  | -7.09868100 | 3.61139400  |

|                  |             |             |             |                  |             |             |             |
|------------------|-------------|-------------|-------------|------------------|-------------|-------------|-------------|
| H                | -3.15329400 | 1.11191300  | 1.42437300  | H                | -0.09747300 | -5.57400800 | 3.95272500  |
| C                | -4.68355700 | 2.11101600  | 4.35876400  | C                | 0.30778000  | -0.58988800 | 4.48747100  |
| H                | -4.38741100 | 2.16862600  | 5.41042900  | H                | 0.35888800  | -0.09913100 | 3.51162100  |
| H                | -5.57068300 | 1.47414600  | 4.28390900  | H                | -0.60307500 | -0.25788200 | 4.99277500  |
| H                | -4.97808700 | 3.11207600  | 4.03089600  | H                | 1.15316800  | -0.24191400 | 5.08909900  |
| <b>1-Nd(NP*)</b> |             |             |             | <b>2-Nd(NP*)</b> |             |             |             |
| Nd               | 0.01880800  | -0.02324700 | -0.02759000 | Nd               | -0.07456200 | 0.02113600  | 0.08233300  |
| P                | 0.24501400  | 3.45863300  | -1.65769200 | P                | 1.92104300  | 0.84786800  | 3.19570500  |
| P                | 3.32094600  | -1.91934300 | -0.62754100 | N                | 3.41827000  | 0.06820200  | 3.35854900  |
| P                | -0.55869400 | 0.53097100  | 3.72944400  | N                | 1.21714300  | 0.78067100  | 4.74824300  |
| P                | -2.99921600 | -1.99998700 | -1.32145400 | N                | 1.14240800  | 0.36413500  | 1.94897300  |
| N                | -0.38956500 | 0.21494200  | 2.23665400  | N                | 2.28949600  | 2.52540000  | 3.41285400  |
| N                | 0.16651700  | 2.03929800  | -1.07647700 | C                | 3.93626900  | -0.79733500 | 2.32010800  |
| N                | 3.36663100  | -3.55621200 | -0.12032600 | H                | 4.80044300  | -0.32743400 | 1.82235100  |
| N                | 0.00718100  | -0.70351100 | 4.76055900  | H                | 3.14747000  | -0.87565400 | 1.56866400  |
| N                | 2.00078500  | -1.21019300 | -0.29796800 | C                | 4.33500200  | -2.18662700 | 2.80002200  |
| N                | -1.72386600 | -1.22616500 | -0.96322400 | H                | 4.69380100  | -2.78462200 | 1.95667800  |
| N                | 3.92022700  | -2.03132000 | -2.26078100 | H                | 3.48596000  | -2.71020000 | 3.24466800  |
| N                | -0.25222800 | 3.56264000  | -3.28451400 | H                | 5.14049400  | -2.15906400 | 3.54051400  |
| C                | 2.99742000  | -2.26852600 | -3.39154000 | C                | 0.63566500  | -0.39055700 | 5.41858900  |
| N                | 1.72161700  | 4.34877100  | -1.59905300 | C                | 1.06350800  | -0.40474000 | 6.89021600  |
| N                | -2.11815100 | 0.94723800  | 4.39955200  | H                | 2.15379700  | -0.40431000 | 6.97759400  |
| N                | -2.99354000 | -2.58603100 | -2.93401000 | H                | 0.68401500  | -1.30589700 | 7.38071700  |
| N                | -3.52316800 | -3.37748100 | -0.38670800 | H                | 0.67602600  | 0.45509400  | 7.44379600  |
| N                | 4.83534500  | -1.27093000 | -0.11445300 | C                | 2.76519400  | 3.38763200  | 2.31367600  |
| N                | -0.59745600 | 4.80511500  | -0.94652200 | C                | 1.12248500  | -1.68325800 | 4.77132700  |
| N                | 0.11896900  | 1.94769200  | 4.42442900  | H                | 0.90656400  | -1.69833900 | 3.70128900  |
| C                | 4.91815400  | -0.99477100 | -2.45509400 | H                | 0.61612900  | -2.53459300 | 5.23536200  |
| H                | 4.47033000  | 0.00205100  | -2.58849500 | H                | 2.19758000  | -1.80977000 | 4.90899600  |
| H                | 5.54079200  | -1.20521000 | -3.32985700 | C                | 1.30430900  | 3.10151500  | 4.31062200  |
| C                | 3.04682300  | 3.77857600  | -1.86317700 | H                | 0.34072500  | 3.28966600  | 3.81157800  |
| C                | -4.52122300 | -3.28506900 | -4.79055300 | H                | 1.65746700  | 4.04776200  | 4.73001800  |
| H                | -4.85953500 | -2.25733700 | -4.95040300 | C                | -0.89177800 | -0.33631000 | 5.32756400  |
| H                | -5.35975600 | -3.95780900 | -5.00284100 | H                | -1.29107800 | 0.57737500  | 5.77783000  |
| H                | -3.73940400 | -3.49926900 | -5.52436300 | H                | -1.34613400 | -1.18604400 | 5.84773400  |
| C                | 0.28494000  | -2.02566800 | 4.23832900  | H                | -1.19986800 | -0.36035600 | 4.28120100  |
| H                | 0.29129200  | -1.92818600 | 3.15029800  | C                | 1.12125500  | 2.06707800  | 5.40308000  |
| H                | -0.52759400 | -2.72991000 | 4.48533400  | H                | 1.89959000  | 2.18741400  | 6.17417700  |
| C                | 4.61767500  | -4.29051900 | -0.11180600 | H                | 0.14966000  | 2.19923400  | 5.89216100  |
| H                | 4.68977000  | -4.84325500 | 0.83780200  | C                | 3.60462000  | 4.52027800  | 2.91504000  |
| H                | 5.44466300  | -3.57413400 | -0.10293000 | H                | 3.01482700  | 5.17603000  | 3.56124800  |
| C                | 1.99679000  | -3.36194500 | -3.02205400 | H                | 4.02326900  | 5.14500200  | 2.11986800  |
| H                | 2.50725100  | -4.28554200 | -2.74415000 | H                | 4.42978800  | 4.11402300  | 3.50601200  |
| H                | 1.34747700  | -3.56552800 | -3.87896800 | C                | 4.23585800  | 0.27985100  | 4.53773800  |
| H                | 1.36727000  | -3.05179200 | -2.18580800 | H                | 4.32956100  | -0.66156100 | 5.10164600  |
| N                | -4.55911700 | -1.29838800 | -1.16197000 | H                | 3.70061100  | 0.96891500  | 5.19282400  |
| C                | 2.23065200  | -1.00328600 | -3.79109500 | C                | 3.66300900  | 2.59386600  | 1.36608400  |
| H                | 1.66923400  | -0.61714700 | -2.93834700 | H                | 3.10737600  | 1.79036300  | 0.87810400  |
| H                | 1.52839300  | -1.21941400 | -4.60167600 | H                | 4.51040400  | 2.15330900  | 1.89359600  |
| H                | 2.90140800  | -0.21455100 | -4.14384300 | H                | 4.05186300  | 3.26460700  | 0.59456200  |
| C                | 5.22945700  | -0.91753200 | 1.25206300  | C                | 5.62649400  | 0.83663500  | 4.26590700  |
| C                | 5.75628400  | -1.00816200 | -1.19194600 | H                | 6.21551200  | 0.18388200  | 3.61480600  |
| H                | 6.53714000  | -1.78566900 | -1.26512100 | H                | 6.17828000  | 0.94236100  | 5.20520000  |
| H                | 6.26527200  | -0.04369200 | -1.06758400 | H                | 5.57068000  | 1.82200600  | 3.79742800  |
| C                | 2.95299200  | 2.69095000  | -2.93188500 | C                | 1.60612400  | 3.98454000  | 1.50976500  |
| H                | 2.31162100  | 1.87284600  | -2.59965100 | H                | 0.95203500  | 3.20129200  | 1.11770700  |
| H                | 3.95118900  | 2.28662600  | -3.12726100 | H                | 1.98998900  | 4.56954600  | 0.66872400  |
| H                | 2.55463600  | 3.08504500  | -3.86904900 | H                | 0.99724300  | 4.66050900  | 2.11788200  |
| C                | -0.29520900 | 4.83468500  | -3.97280300 | P                | -1.72369200 | -3.39691200 | 0.20793800  |
| H                | -0.17859300 | 5.61698100  | -3.22082100 | N                | -2.42741000 | -3.70414800 | 1.71740800  |
| H                | -1.29893000 | 4.98603200  | -4.40064400 | N                | -2.85925900 | -3.98037300 | -0.92848600 |

|   |             |             |             |   |             |             |             |
|---|-------------|-------------|-------------|---|-------------|-------------|-------------|
| C | -4.03747400 | -3.49327600 | -3.36119600 | N | -1.15115200 | -1.96651300 | 0.07767200  |
| H | -4.88053700 | -3.37674300 | -2.67812900 | N | -0.70564400 | -4.77084200 | -0.08057800 |
| H | -3.70735800 | -4.54255700 | -3.25237600 | C | -2.29299000 | -2.77637900 | 2.82243500  |
| C | 2.31850600  | -4.06636600 | 0.73885900  | H | -1.62025100 | -3.18588400 | 3.59186400  |
| H | 1.47460100  | -3.37920200 | 0.64947800  | H | -1.79632500 | -1.88990900 | 2.42314200  |
| H | 2.63629100  | -4.03639700 | 1.79691400  | C | -3.61292400 | -2.38365600 | 3.47172100  |
| C | -5.45491700 | -2.04504400 | -0.31213400 | H | -3.43326000 | -1.65800500 | 4.27002000  |
| H | -6.17017400 | -2.65064500 | -0.89640800 | H | -4.29053500 | -1.92633100 | 2.74738600  |
| H | -6.04190300 | -1.38513600 | 0.33798100  | H | -4.12722300 | -3.23791900 | 3.92303200  |
| C | -0.46280300 | 2.36248400  | -4.06731700 | C | -4.15702900 | -3.38781300 | -1.28107500 |
| H | -0.53428700 | 1.53792500  | -3.35371800 | C | -5.21874600 | -4.48856500 | -1.38199700 |
| H | 0.41156100  | 2.14300400  | -4.70370800 | H | -5.28790300 | -5.04885300 | -0.44531900 |
| C | -2.81233500 | 3.89956300  | -1.49502600 | H | -6.19805600 | -4.04504000 | -1.58418600 |
| H | -2.77563900 | 4.37346200  | -2.47862000 | H | -5.00900900 | -5.19650900 | -2.18889200 |
| H | -3.85469200 | 3.85943100  | -1.16560600 | C | 0.67135300  | -4.86619800 | 0.44000200  |
| H | -2.44811200 | 2.87550600  | -1.59058400 | C | -4.60793100 | -2.38970700 | -0.21897700 |
| C | -2.57497100 | -4.38664300 | 0.11316600  | H | -3.85458900 | -1.61700700 | -0.05413900 |
| C | -0.89038600 | -1.31069400 | 7.02953300  | H | -5.53093200 | -1.90324500 | -0.54760200 |
| H | -1.91562200 | -0.99680700 | 6.82275100  | H | -4.80485200 | -2.88824900 | 0.73113300  |
| H | -0.69655800 | -1.15563700 | 8.09690300  | C | -0.92950400 | -5.24605300 | -1.43156400 |
| H | -0.81589900 | -2.38555200 | 6.83569100  | H | -0.42235900 | -4.62292700 | -2.18726800 |
| C | -1.99044400 | 4.68703700  | -0.47827300 | H | -0.57685000 | -6.27416700 | -1.55426800 |
| C | 1.63626400  | 5.57354900  | -0.83735500 | C | -4.04524500 | -2.65797500 | -2.62305100 |
| H | 1.66329700  | 6.45846600  | -1.49519500 | H | -3.70511500 | -3.32811400 | -3.41883500 |
| H | 2.46569600  | 5.67272800  | -0.12625900 | H | -5.01311200 | -2.24709100 | -2.92899700 |
| C | 2.43092300  | 1.25796200  | 3.95724500  | H | -3.32988600 | -1.83867200 | -2.53549000 |
| H | 2.45710200  | 0.59029000  | 4.82154500  | C | -2.43038300 | -5.16821300 | -1.63081200 |
| H | 3.44105200  | 1.63679600  | 3.77905200  | H | -2.91157500 | -6.07577900 | -1.23032200 |
| H | 2.12413700  | 0.67671800  | 3.08580700  | H | -2.67045800 | -5.11508000 | -2.69927800 |
| C | -1.86514800 | -3.93089100 | 1.39216900  | C | 1.02616400  | -6.34688500 | 0.61368900  |
| H | -1.36922200 | -2.97231600 | 1.22458800  | H | 1.04352300  | -6.88643600 | -0.33750400 |
| H | -1.11419300 | -4.66472700 | 1.70264600  | H | 2.02039800  | -6.44766300 | 1.05966300  |
| H | -2.56661800 | -3.81106900 | 2.22286500  | H | 0.30334200  | -6.83889000 | 1.26959100  |
| C | 1.60640400  | -2.61584800 | 4.70958700  | C | -3.13692800 | -4.94559900 | 1.96229900  |
| H | 1.61640400  | -2.82072400 | 5.78552300  | H | -4.19643300 | -4.73355800 | 2.17475200  |
| H | 2.43950700  | -1.94662600 | 4.48287100  | H | -3.12741000 | -5.52289000 | 1.03653600  |
| H | 1.79041200  | -3.56495500 | 4.19700500  | C | 0.77278300  | -4.19471900 | 1.80796900  |
| C | -1.73974600 | -2.65207600 | -3.66399300 | H | 0.57266100  | -3.12355300 | 1.74259200  |
| H | -1.61469900 | -3.67003600 | -4.06643800 | H | 0.07135200  | -4.63263500 | 2.51961800  |
| H | -0.92708200 | -2.48542400 | -2.95444300 | H | 1.78438900  | -4.32737000 | 2.20152700  |
| C | 4.82111500  | -5.24668800 | -1.28148900 | H | -2.56664600 | -5.80236100 | 3.08413400  |
| H | 4.03136600  | -5.99973300 | -1.34001600 | C | -2.55668800 | -5.27728100 | 4.04363600  |
| H | 5.78115900  | -5.76887800 | -1.18799900 | H | -3.17337400 | -6.70422500 | 3.21287900  |
| H | 4.82730100  | -4.68418200 | -2.21685500 | H | -1.54446200 | -6.11464200 | 2.85827300  |
| C | 3.80962100  | -2.76518000 | -4.59315800 | C | 1.68418400  | -4.20837100 | -0.50303700 |
| H | 4.48446300  | -1.99966300 | -4.98665700 | H | 1.41524200  | -3.16469000 | -0.68565400 |
| H | 3.13401200  | -3.04651600 | -5.40692800 | H | 2.68575000  | -4.23862800 | -0.06431400 |
| H | 4.40506400  | -3.64224700 | -4.32341500 | H | 1.73642800  | -4.72891000 | -1.46518000 |
| C | -3.34011800 | 0.22992700  | 3.99028800  | P | -2.53201100 | 2.83920200  | -0.45535300 |
| C | 6.66475300  | -1.38641100 | 1.52588600  | N | -3.82852400 | 2.46365500  | -1.48319100 |
| H | 6.76296800  | -2.46574800 | 1.37809400  | N | -2.13085900 | 4.45311800  | -0.85939700 |
| H | 6.93768300  | -1.16195000 | 2.56178900  | N | -1.44482200 | 1.74201400  | -0.43500100 |
| H | 7.39268400  | -0.88613300 | 0.88018400  | N | -3.28543000 | 3.37920400  | 1.00729800  |
| C | 1.48531800  | 2.43055000  | 4.19995200  | C | -3.97128800 | 1.14632400  | -2.06713600 |
| C | -5.05561100 | -0.06504600 | -1.78260800 | H | -4.82064200 | 0.61092800  | -1.61497700 |
| C | 4.30822700  | -1.59155300 | 2.26519200  | H | -3.07407400 | 0.58832000  | -1.79047200 |
| H | 3.26080900  | -1.35495700 | 2.06571900  | C | -4.13793700 | 1.15109800  | -3.58124100 |
| H | 4.55525100  | -1.24145200 | 3.27185300  | H | -4.20720600 | 0.12434500  | -3.95282600 |
| H | 4.42481400  | -2.67789100 | 2.24612600  | H | -3.28876700 | 1.63387600  | -4.07115400 |
| C | -2.21074500 | 2.39400100  | 4.46170400  | H | -5.04736900 | 1.66994700  | -3.90018600 |
| H | -2.40899400 | 2.84702700  | 3.47827800  | C | -1.41744500 | 4.91850800  | -2.05298900 |
| H | -3.00557400 | 2.71051200  | 5.14431700  | C | -2.05391200 | 6.21668300  | -2.56135200 |



|   |             |             |             |   |             |             |             |
|---|-------------|-------------|-------------|---|-------------|-------------|-------------|
| C | 0.32085900  | 5.51858000  | -0.07885400 | H | -3.11618800 | 6.06846300  | -2.77518900 |
| H | 0.47070200  | 5.00788200  | 0.88419200  | H | -1.56300200 | 6.53958400  | -3.48440700 |
| H | -0.04073400 | 6.53007700  | 0.13068800  | H | -1.96209700 | 7.03364900  | -1.84036900 |
| C | -4.07283200 | 0.45849400  | -2.82489900 | C | -3.74145500 | 2.45514100  | 2.06398500  |
| H | -3.08334000 | 0.61496500  | -2.39040100 | C | -1.49889700 | 3.88327500  | -3.17151000 |
| H | -4.43791300 | 1.41275000  | -3.21551900 | H | -1.11823800 | 2.91500600  | -2.83984400 |
| H | -3.96597400 | -0.24112600 | -3.65443100 | H | -0.90090800 | 4.22146700  | -4.02359100 |
| C | 3.97851000  | 4.87892300  | -2.38297100 | H | -2.52820700 | 3.75003400  | -3.50822000 |
| H | 3.56583400  | 5.34804700  | -3.28099700 | C | -2.62553900 | 4.59463400  | 1.44703800  |
| H | 4.95363100  | 4.45235100  | -2.63814800 | H | -1.65021800 | 4.39593400  | 1.91940100  |
| H | 4.14965800  | 5.66348700  | -1.64011800 | H | -3.24238900 | 5.14110400  | 2.16604900  |
| C | -0.85860900 | 2.85895500  | 4.97268700  | C | 0.05643200  | 5.16481000  | -1.71520500 |
| H | -0.67632200 | 3.89241100  | 4.65406400  | H | 0.16910100  | 5.90656500  | -0.91901500 |
| H | -0.84411600 | 2.84856700  | 6.07619600  | H | 0.60491300  | 5.53402800  | -2.58895500 |
| C | -3.34085400 | -5.68634300 | 0.38721400  | H | 0.51198200  | 4.23383100  | -1.37299800 |
| H | -4.05445500 | -5.58486600 | 1.20988600  | C | -2.42602100 | 5.40960700  | 0.18445100  |
| H | -2.64197600 | -6.48197400 | 0.66419800  | H | -3.33649600 | 5.98855000  | -0.04187700 |
| H | -3.88841200 | -6.00127300 | -0.50593700 | H | -1.60726900 | 6.12541300  | 0.32170200  |
| C | 5.15636400  | 0.59990200  | 1.44523600  | C | -4.90853500 | 3.11043800  | 2.81104600  |
| H | 5.79683200  | 1.12390800  | 0.72939700  | H | -4.60889200 | 4.02482700  | 3.33061300  |
| H | 5.48442600  | 0.88512200  | 2.45087500  | H | -5.30573500 | 2.42616700  | 3.56710000  |
| H | 4.13302500  | 0.94691300  | 1.30020500  | H | -5.71438000 | 3.36297100  | 2.11690400  |
| C | 0.09742300  | -0.50793100 | 6.19124100  | C | -4.86682600 | 3.43949600  | -1.75337500 |
| H | -0.04443600 | 0.55640300  | 6.38692400  | H | -4.86249000 | 3.70385200  | -2.82296700 |
| H | 1.12075700  | -0.73843300 | 6.52686900  | H | -4.60871000 | 4.35471400  | -1.21857300 |
| C | 0.74170900  | 5.01751700  | -5.07462900 | C | -4.25287200 | 1.15330200  | 1.45068500  |
| H | 0.60307800  | 5.98487700  | -5.57040300 | C | -3.45851300 | 0.61470400  | 0.93009700  |
| H | 0.66728500  | 4.24175200  | -5.84327700 | H | -5.06099800 | 1.33724200  | 0.74102600  |
| H | 1.75357600  | 4.98963300  | -4.66519100 | H | -4.63691900 | 0.50698600  | 2.24443300  |
| C | -5.25216000 | 1.02025500  | -0.71764600 | C | -6.27275800 | 3.01303800  | -1.35399500 |
| H | -5.95633200 | 0.70905600  | 0.05960100  | H | -6.59263000 | 2.10152100  | -1.86740600 |
| H | -5.64753600 | 1.93658600  | -1.16888400 | H | -6.99011600 | 3.79932100  | -1.60953000 |
| H | -4.30018700 | 1.25333600  | -0.23811900 | H | -6.33804100 | 2.83598400  | -0.27804800 |
| C | -6.39541200 | -0.33946300 | -2.47821000 | C | -2.62363400 | 2.12866200  | 3.05903600  |
| H | -6.28831500 | -1.13379900 | -3.22257700 | H | -1.74522600 | 1.72540500  | 2.54818900  |
| H | -6.74823800 | 0.56205800  | -2.98919300 | H | -2.96823800 | 1.39031100  | 3.78839300  |
| H | -7.17333000 | -0.64006100 | -1.76946700 | H | -2.30972000 | 3.01403000  | 3.62078600  |
| C | -1.53058700 | -4.68212800 | -0.95994700 | P | 2.45303100  | -0.26629100 | -3.06596200 |
| H | -2.00516100 | -4.98205500 | -1.89770800 | N | 2.91469800  | 1.21644300  | -3.66541900 |
| H | -0.88582700 | -5.49960400 | -0.62849400 | N | 3.82666700  | -1.23597700 | -3.11284300 |
| H | -0.90110700 | -3.81015800 | -1.14665400 | N | 1.59153500  | -0.10716400 | -1.74194900 |
| C | -2.08555800 | 3.99509300  | 0.88605700  | N | 1.64063000  | -1.20386200 | -4.21156400 |
| H | -1.61371900 | 3.01059500  | 0.85230300  | C | 2.33091200  | 2.46784600  | -3.18774400 |
| H | -3.13339800 | 3.87198300  | 1.17980100  | H | 1.73560700  | 2.92683600  | -3.98746400 |
| H | -1.59295200 | 4.58010000  | 1.66925600  | H | 1.63262900  | 2.21438500  | -2.38949200 |
| C | -3.06124300 | -1.27016600 | 3.93562000  | C | 3.36491600  | 3.46082700  | -2.68279500 |
| H | -2.32990100 | -1.50155700 | 3.15921000  | H | 2.86068300  | 4.35111900  | -2.30022300 |
| H | -3.98704500 | -1.80356000 | 3.69890300  | H | 3.95757700  | 3.03572700  | -1.87003500 |
| H | -2.68663900 | -1.64283900 | 4.89020800  | H | 4.04939400  | 3.79034500  | -3.47014600 |
| C | 1.52815100  | 3.36989000  | 2.99006900  | C | 4.98587000  | -1.17349100 | -2.19976100 |
| H | 1.18603400  | 2.84599900  | 2.09447400  | C | 6.26605500  | -1.39353900 | -3.00892700 |
| H | 2.54281700  | 3.74304900  | 2.81194100  | H | 6.36765800  | -0.63890800 | -3.79388900 |
| H | 0.88000800  | 4.23924800  | 3.14359500  | H | 7.13949200  | -1.32223800 | -2.35518700 |
| C | -2.59724700 | 6.09180900  | -0.38047200 | H | 6.29171000  | -2.38081100 | -3.47846800 |
| H | -2.13115900 | 6.69522100  | 0.40374700  | C | 0.27189200  | -0.99084800 | -4.73440000 |
| H | -3.66317400 | 6.02207900  | -0.14166800 | C | 5.06379000  | 0.19319400  | -1.52672600 |
| H | -2.49023100 | 6.62143600  | -1.33173400 | H | 4.16413100  | 0.41286500  | -0.94546500 |
| C | 3.63182500  | 3.16098400  | -0.59067000 | H | 5.90683800  | 0.20245000  | -0.83140800 |
| H | 3.71232600  | 3.89780500  | 0.21554100  | H | 5.21611300  | 0.99336100  | -2.25274000 |
| H | 4.63340400  | 2.75675700  | -0.77050800 | C | 2.18184900  | -2.55613100 | -4.21789500 |
| H | 2.98589200  | 2.34894700  | -0.25177100 | H | 1.72953200  | -3.17181000 | -3.43071500 |
| C | -4.57183200 | -2.95330300 | 0.51954400  | H | 1.98940600  | -3.03743000 | -5.17925800 |

|                  |             |             |             |                  |             |             |             |
|------------------|-------------|-------------|-------------|------------------|-------------|-------------|-------------|
| H                | -4.18179900 | -2.40030200 | 1.38770000  | C                | 4.85931800  | -2.24442200 | -1.11428000 |
| H                | -5.14543100 | -3.80792400 | 0.89187400  | H                | 4.81847800  | -3.25353600 | -1.53376000 |
| C                | 1.97084300  | 3.17221100  | 5.45079500  | H                | 5.71923400  | -2.20796100 | -0.43900700 |
| H                | 1.37977300  | 4.06890100  | 5.65881900  | H                | 3.95262900  | -2.08222600 | -0.52915400 |
| H                | 3.00987600  | 3.48871400  | 5.31728200  | C                | 3.67413800  | -2.39347300 | -3.97982000 |
| H                | 1.92261200  | 2.52055600  | 6.32862600  | H                | 4.20305600  | -2.24231200 | -4.93206800 |
| C                | 1.88756400  | -5.48722300 | 0.40540500  | H                | 4.08110300  | -3.29358600 | -3.51238000 |
| H                | 1.06070300  | -5.79044700 | 1.05593300  | C                | 0.29683000  | -1.22909100 | -6.24863500 |
| H                | 2.69745700  | -6.20863800 | 0.55544900  | H                | 0.56661400  | -2.25666300 | -6.50604400 |
| H                | 1.55224100  | -5.56391200 | -0.63191000 | H                | -0.69509300 | -1.04333400 | -6.66891500 |
| C                | -1.60454700 | -1.62386400 | -4.77968400 | H                | 1.00658800  | -0.55627700 | -6.73677800 |
| H                | -2.42745200 | -1.66981600 | -5.49760900 | C                | 3.88078900  | 1.30811700  | -4.75469900 |
| H                | -0.66938200 | -1.77613200 | -5.33008700 | H                | 4.76429700  | 1.86257700  | -4.41158900 |
| H                | -1.58131900 | -0.61887800 | -4.35426800 | H                | 4.22736500  | 0.29801300  | -4.97854000 |
| C                | -1.70795200 | 2.41227700  | -4.94215600 | C                | -0.18497900 | 0.44193400  | -4.48546700 |
| H                | -2.59964800 | 2.62192600  | -4.34685500 | H                | -0.25822800 | 0.67007900  | -3.42002400 |
| H                | -1.85398600 | 1.44920800  | -5.43935600 | H                | 0.48612400  | 1.16602900  | -4.95200000 |
| H                | -1.63814800 | 3.17355600  | -5.72643300 | H                | -1.17718900 | 0.57832000  | -4.92090900 |
| C                | -3.84844300 | 0.67613200  | 2.61629300  | C                | 3.33332000  | 1.95226500  | -6.01888400 |
| H                | -4.12269300 | 1.73545000  | 2.60554800  | C                | 3.03482100  | 2.99172500  | -5.86063100 |
| H                | -4.74015500 | 0.10681400  | 2.33480800  | H                | 4.10095200  | 1.95011100  | -6.79790600 |
| H                | -3.07789500 | 0.50758700  | 1.86122800  | H                | 2.46708300  | 1.40407900  | -6.39747000 |
| C                | -4.42694400 | 0.47115200  | 5.04374300  | C                | -0.70912800 | -1.95709100 | -4.07252800 |
| H                | -4.06244400 | 0.20512200  | 6.04040600  | H                | -0.71848000 | -1.84014600 | -2.98495100 |
| H                | -5.30598700 | -0.14232900 | 4.82202400  | H                | -1.72002300 | -1.77125500 | -4.44316400 |
| H                | -4.75988300 | 1.51275400  | 5.06800400  | H                | -0.46935000 | -3.00001300 | -4.30058200 |
| <b>1-Dy(NP*)</b> |             |             |             | <b>2-Dy(NP*)</b> |             |             |             |
| Dy               | -0.00000700 | 0.03667200  | 0.00123300  | Dy               | -0.03749100 | -0.07643200 | 0.06322800  |
| P                | -3.00592100 | 2.16341900  | -0.62282300 | P                | -2.11527700 | 1.73787800  | 2.52582200  |
| N                | -1.72197100 | 1.33652800  | -0.49506300 | N                | -1.57856500 | 3.27927800  | 2.98212500  |
| N                | -2.89813000 | 3.40681300  | -1.78637000 | N                | -2.56346800 | 0.97439500  | 3.98421300  |
| N                | -3.71012900 | 2.96453100  | 0.75683600  | N                | -1.14519100 | 1.05283100  | 1.53810900  |
| N                | -4.52183300 | 1.43514800  | -0.97663600 | N                | -3.77744200 | 1.98324600  | 2.12418900  |
| C                | -4.81048500 | 2.15700700  | 1.24829600  | C                | -0.39286300 | 3.86964500  | 2.39825200  |
| H                | -5.47506200 | 2.74145700  | 1.89248200  | H                | -0.66658000 | 4.70179600  | 1.72936300  |
| H                | -4.46702600 | 1.28075600  | 1.81751100  | H                | 0.04916700  | 3.09313500  | 1.77139100  |
| C                | -5.54472200 | 1.69755400  | 0.00433000  | C                | 0.63248500  | 4.36926200  | 3.40793400  |
| H                | -6.13974700 | 0.80181000  | 0.22263600  | H                | 1.49305500  | 4.79465700  | 2.88309900  |
| H                | -6.24601000 | 2.48313700  | -0.32989900 | H                | 0.99744700  | 3.55869200  | 4.04145000  |
| C                | -4.86068400 | 0.61836200  | -2.14641900 | H                | 0.23361800  | 5.15340100  | 4.05889100  |
| C                | -6.16889400 | 1.11410400  | -2.77621600 | C                | -1.67669200 | 0.47710800  | 5.04463500  |
| H                | -7.02153800 | 0.99898800  | -2.09971900 | C                | -2.23780300 | 0.87060400  | 6.41536600  |
| H                | -6.38935000 | 0.53956700  | -3.68156400 | H                | -2.37049600 | 1.95408200  | 6.48474000  |
| H                | -6.09279000 | 2.16902200  | -3.05421800 | H                | -1.54490300 | 0.56224800  | 7.20377200  |
| C                | -5.03049000 | -0.84602600 | -1.73028400 | H                | -3.20007300 | 0.39408900  | 6.62268000  |
| H                | -4.09824500 | -1.22698600 | -1.31295700 | C                | -4.22932900 | 2.45773100  | 0.80285600  |
| H                | -5.30911100 | -1.46499600 | -2.59009600 | C                | -0.28534800 | 1.08565400  | 4.90787700  |
| H                | -5.81301600 | -0.96336500 | -0.97487000 | H                | 0.11536400  | 0.93505400  | 3.90366000  |
| C                | -3.75843200 | 0.70520300  | -3.19840800 | H                | 0.39375100  | 0.61497500  | 5.62429000  |
| H                | -3.73234400 | 1.69429400  | -3.65826000 | H                | -0.30846200 | 2.15671400  | 5.11374000  |
| H                | -3.94490800 | -0.03585700 | -3.98091000 | C                | -4.56437800 | 0.92606200  | 2.73314800  |
| H                | -2.77733900 | 0.51265000  | -2.75876300 | H                | -4.48443500 | -0.02388000 | 2.18267900  |
| C                | -2.85849500 | 3.60946100  | 1.77439100  | H                | -5.62237200 | 1.19941700  | 2.78151000  |
| C                | -2.26816000 | 2.59781600  | 2.76229800  | C                | -1.56711800 | -1.04644800 | 4.95390100  |
| H                | -3.04514900 | 2.12019000  | 3.36606300  | H                | -2.54432900 | -1.52722900 | 5.05714800  |
| H                | -1.57785400 | 3.09017400  | 3.45496200  | H                | -0.92019600 | -1.44113600 | 5.74410300  |
| H                | -1.72433400 | 1.81868400  | 2.22377700  | H                | -1.15259300 | -1.32777600 | 3.98517800  |
| C                | -3.69975800 | 4.63729700  | 2.53854800  | C                | -3.98704400 | 0.76265700  | 4.12399800  |
| H                | -4.16264800 | 5.34653700  | 1.84603500  | H                | -4.43860400 | 1.49615800  | 4.81150900  |
| H                | -3.06604200 | 5.19671000  | 3.23402000  | H                | -4.21058700 | -0.23675000 | 4.51417700  |
| H                | -4.49243400 | 4.17006300  | 3.13022200  | C                | -5.51981200 | 3.26271800  | 0.99239900  |

|   |             |             |             |   |             |             |             |
|---|-------------|-------------|-------------|---|-------------|-------------|-------------|
| C | -1.71712800 | 4.35191200  | 1.08537300  | H | -6.32903200 | 2.65494800  | 1.40652200  |
| H | -1.06482900 | 3.65404600  | 0.55849000  | H | -5.86934700 | 3.65302500  | 0.03129200  |
| H | -1.11812100 | 4.88061000  | 1.83169300  | H | -5.35109700 | 4.10612500  | 1.66693400  |
| H | -2.09465200 | 5.08323700  | 0.36867900  | C | -2.29971800 | 4.04025300  | 3.98356200  |
| C | -3.92454100 | 5.69769700  | -1.74522600 | H | -1.68515700 | 4.14619400  | 4.89152800  |
| H | -4.80792000 | 6.24751200  | -2.08849600 | H | -3.17322900 | 3.45572900  | 4.27632400  |
| H | -3.04771500 | 6.16903900  | -2.19985900 | C | -3.18494900 | 3.38458100  | 0.18400500  |
| H | -3.85105500 | 5.81809900  | -0.66240500 | H | -2.25012100 | 2.85406600  | -0.00444800 |
| C | -4.04348300 | 4.22451100  | -2.11737600 | H | -2.97014000 | 4.23288200  | 0.83571600  |
| H | -4.91134200 | 3.80282500  | -1.60836200 | H | -3.56536100 | 3.77054800  | -0.76573100 |
| H | -4.25849800 | 4.14499700  | -3.19565900 | C | -2.75856700 | 5.41917200  | 3.52990900  |
| C | -1.62423500 | 3.75658800  | -2.37378700 | H | -1.92261100 | 6.05557000  | 3.22495400  |
| H | -0.93834600 | 2.95214200  | -2.10318000 | H | -3.27558900 | 5.93080000  | 4.34765800  |
| H | -1.22139900 | 4.67887600  | -1.92441000 | H | -3.45179800 | 5.34700400  | 2.68853600  |
| C | -1.65633700 | 3.92315800  | -3.88706100 | C | -4.49413300 | 1.29217800  | -0.15515800 |
| H | -2.02749000 | 3.01996800  | -4.37692700 | H | -3.62627800 | 0.63074400  | -0.22502200 |
| H | -0.64522900 | 4.11500100  | -4.26031300 | H | -4.72582400 | 1.66959000  | -1.15508000 |
| H | -2.28314600 | 4.76256100  | -4.20661100 | H | -5.35189900 | 0.69324300  | 0.16675300  |
| P | 0.81408300  | -2.16178800 | -2.92004600 | P | 3.13502700  | -1.45674700 | 1.41483800  |
| N | 0.53616800  | -1.17872900 | -1.77708900 | N | 2.92169600  | -2.18930800 | 2.92628000  |
| N | 0.48503600  | -1.52660500 | -4.46789600 | N | 4.15333500  | -2.52720100 | 0.55305600  |
| N | 0.06246500  | -3.70353000 | -2.97581600 | N | 1.81585500  | -0.95594100 | 0.79014700  |
| N | 2.37227000  | -2.91892800 | -3.13492000 | N | 4.46241700  | -0.37175800 | 1.65893600  |
| C | 0.97992200  | -4.81681000 | -2.94367800 | C | 1.63581700  | -2.19537700 | 3.59348700  |
| H | 1.04747200  | -5.31273800 | -3.92768900 | H | 1.63268500  | -1.48857600 | 4.43775800  |
| H | 0.67216400  | -5.57851700 | -2.21639300 | H | 0.91494400  | -1.81520700 | 2.86881800  |
| C | 2.33062800  | -4.24529100 | -2.55011700 | C | 1.18915200  | -3.56276700 | 4.09283000  |
| H | 2.41744400  | -4.22624400 | -1.45435300 | H | 0.20233800  | -3.47972300 | 4.55690000  |
| H | 3.13834800  | -4.87376100 | -2.93890200 | H | 1.11348800  | -4.28258500 | 3.27528100  |
| C | 3.62405700  | -2.16280500 | -2.95553900 | H | 1.86548700  | -3.97719500 | 4.84681800  |
| C | 4.74904900  | -2.88248900 | -3.70688200 | C | 3.81273800  | -3.86024000 | 0.03701700  |
| H | 4.98112100  | -3.85929500 | -3.27254000 | C | 4.93027100  | -4.85390900 | 0.37229300  |
| H | 5.66669300  | -2.28673200 | -3.66844900 | H | 5.11425400  | -4.88417600 | 1.44988700  |
| H | 4.47808200  | -3.03150500 | -4.75615600 | H | 4.64322100  | -5.85910600 | 0.04992000  |
| C | 4.00262900  | -2.01112500 | -1.48073800 | H | 5.87088200  | -4.60740300 | -0.12864800 |
| H | 3.19773800  | -1.50578400 | -0.94356700 | C | 4.29694800  | 0.99144300  | 2.19577600  |
| H | 4.91299500  | -1.41230700 | -1.37924500 | C | 2.51883800  | -4.36758100 | 0.66526300  |
| H | 4.19358900  | -2.97652000 | -1.00168800 | H | 1.71518700  | -3.63649000 | 0.55810100  |
| C | 3.46671300  | -0.76600300 | -3.54960000 | H | 2.21083800  | -5.29378000 | 0.17189900  |
| H | 3.17720800  | -0.80628000 | -4.60061900 | H | 2.65582600  | -4.57621000 | 1.72680100  |
| H | 4.41729000  | -0.22912300 | -3.47659200 | C | 5.41850000  | -0.53622500 | 0.58233100  |
| H | 2.71137500  | -0.20303600 | -2.99813400 | H | 5.10004500  | -0.03036100 | -0.34410100 |
| C | -1.36664400 | -3.96037000 | -2.77856800 | H | 6.39934100  | -0.13845300 | 0.85891200  |
| C | -1.65880200 | -4.24375500 | -1.30165100 | C | 3.62892000  | -3.79147400 | -1.48119200 |
| H | -1.10343400 | -5.11882000 | -0.94729300 | H | 4.52774400  | -3.41267700 | -1.97778400 |
| H | -2.72493100 | -4.44292200 | -1.14382500 | H | 3.41420000  | -4.78152800 | -1.89678900 |
| H | -1.36567100 | -3.38853000 | -0.68823600 | H | 2.79873500  | -3.12453000 | -1.71746900 |
| C | -1.79129700 | -5.16177300 | -3.63091600 | C | 5.49385900  | -2.03159200 | 0.34734000  |
| H | -1.56125900 | -4.98740200 | -4.68651200 | H | 6.21135600  | -2.48779500 | 1.04931900  |
| H | -2.87027200 | -5.32039800 | -3.53902900 | H | 5.85205200  | -2.24100500 | -0.66789700 |
| H | -1.29701300 | -6.08753300 | -3.32198700 | C | 5.57331500  | 1.37958800  | 2.94996400  |
| C | -2.18721900 | -2.75554700 | -3.22836000 | H | 6.44852900  | 1.41975200  | 2.29519800  |
| H | -1.89518100 | -1.85666600 | -2.68297900 | H | 5.46069100  | 2.37105200  | 3.39954200  |
| H | -3.24748500 | -2.94517000 | -3.04058500 | H | 5.78009700  | 0.66185700  | 3.74778500  |
| H | -2.05119200 | -2.56658400 | -4.29555100 | C | 4.04248700  | -2.80492600 | 3.60970000  |
| C | 1.66074800  | -2.04572900 | -6.62765500 | C | 3.87455100  | -3.88933700 | 3.70337600  |
| H | 1.62554600  | -1.00556300 | -6.96689500 | H | 4.92314400  | -2.69022200 | 2.97595500  |
| H | 1.57985300  | -2.68317100 | -7.51529600 | C | 3.13281300  | 1.03860700  | 3.18264900  |
| H | 2.63767800  | -2.22221900 | -6.17295900 | H | 2.18734200  | 0.80015200  | 2.69393100  |
| C | 0.54178200  | -2.36703500 | -5.64403100 | H | 3.27924900  | 0.33566800  | 4.00401100  |
| H | -0.42290000 | -2.32339600 | -6.17432500 | H | 3.05583900  | 2.04460800  | 3.60416600  |
| H | 0.64725900  | -3.39914500 | -5.30659100 | C | 4.34787100  | -2.22821600 | 4.98530000  |

|   |             |             |             |   |             |             |             |
|---|-------------|-------------|-------------|---|-------------|-------------|-------------|
| C | 0.27129300  | -0.10813000 | -4.66061100 | H | 3.49739600  | -2.31159000 | 5.66800800  |
| H | 1.17409700  | 0.38064500  | -5.06538300 | H | 5.18570300  | -2.76545600 | 5.44080100  |
| H | 0.11027200  | 0.31610300  | -3.66764100 | H | 4.62279600  | -1.17322100 | 4.91688900  |
| C | -0.90748100 | 0.22260000  | -5.56468400 | C | 4.03916100  | 2.00867300  | 1.07944900  |
| H | -1.83033700 | -0.22793600 | -5.19271700 | H | 3.18542000  | 1.70140200  | 0.46941200  |
| H | -0.75464000 | -0.11664400 | -6.59482000 | H | 3.82737500  | 2.99292200  | 1.50614800  |
| H | -1.05165600 | 1.30609100  | -5.60021600 | H | 4.91288500  | 2.12071800  | 0.42843300  |
| P | -0.82453500 | -2.26410000 | 2.84179600  | P | -2.24739100 | -2.62679900 | -1.42011000 |
| N | -0.54203000 | -1.24131000 | 1.73522800  | N | -1.45691000 | -3.88753700 | -2.23396800 |
| N | -0.49243300 | -1.68696600 | 4.41154600  | N | -3.59747700 | -2.27277500 | -2.41140000 |
| N | -0.08004900 | -3.81028000 | 2.84135500  | N | -1.28463100 | -1.50812600 | -0.97550200 |
| N | -2.38622600 | -3.02126800 | 3.02927300  | N | -3.27586900 | -3.43619000 | -0.29230000 |
| C | -1.00266600 | -4.91740200 | 2.76903500  | C | -0.01359600 | -3.93301800 | -2.33619200 |
| H | -1.07244600 | -5.44839000 | 3.73441700  | H | 0.39941700  | -4.71777600 | -1.68353900 |
| H | -0.69847200 | -5.65362300 | 2.01452000  | H | 0.34717000  | -2.98078100 | -1.94379900 |
| C | -2.35073900 | -4.32575300 | 2.39677600  | C | 0.51200100  | -4.14613900 | -3.75029700 |
| H | -2.43753800 | -4.26660600 | 1.30244500  | H | 1.60600100  | -4.14499800 | -3.74198100 |
| H | -3.16133500 | -4.96415800 | 2.76271600  | H | 0.17887900  | -3.35468900 | -4.42570900 |
| C | -3.63454400 | -2.25338900 | 2.87766900  | C | 0.19608100  | -5.10338900 | -4.17635100 |
| C | -4.76262100 | -2.99431000 | 3.60330000  | H | -3.58999000 | -1.57842800 | -3.70192500 |
| H | -4.99935800 | -3.95384900 | 3.13436700  | C | -4.53649500 | -2.28289100 | -4.67962500 |
| H | -5.67750300 | -2.39332500 | 3.58666900  | H | -4.25842000 | -3.33395200 | -4.79788200 |
| H | -4.49201600 | -3.18206100 | 4.64643300  | H | -4.48506400 | -1.80479000 | -5.66260900 |
| C | -4.01293100 | -2.04728600 | 1.40943100  | H | -5.57852800 | -2.24058300 | -4.35046300 |
| H | -3.20594100 | -1.52675900 | 0.89022600  | C | -2.82464000 | -3.89910000 | 1.03379600  |
| H | -4.92055800 | -1.44103900 | 1.32990100  | C | -2.18869200 | -1.58810000 | -4.30597400 |
| H | -4.20851600 | -2.99402700 | 0.89624200  | H | -1.45291000 | -1.20702200 | -3.59446500 |
| C | -3.47056100 | -0.87948300 | 3.52128300  | H | -2.17099400 | -0.96111100 | -5.20277700 |
| H | -3.18097000 | -0.95869300 | 4.57006200  | H | -1.89628400 | -2.59949500 | -4.59139100 |
| H | -4.41865200 | -0.33593400 | 3.46785600  | C | -4.59925100 | -2.84385300 | -0.35387200 |
| H | -2.71278000 | -0.30060400 | 2.99000800  | H | -4.64941900 | -1.87701700 | 0.17112100  |
| C | 1.34786100  | -4.06643300 | 2.63465300  | H | -5.34856200 | -3.50602900 | 0.08943300  |
| C | 1.63871500  | -4.29727400 | 1.14836000  | C | -4.03807500 | -0.12710800 | -3.50880500 |
| H | 1.07925800  | -5.15625800 | 0.76249500  | H | -5.04659800 | -0.07010400 | -3.08892500 |
| H | 2.70389800  | -4.49557100 | 0.98324200  | H | -4.04686900 | 0.41404500  | -4.46139300 |
| H | 1.34963000  | -3.41895200 | 0.56646900  | H | -3.35844100 | 0.37216300  | -2.81662600 |
| C | 1.76686300  | -5.30002200 | 3.44266900  | C | -4.86897500 | -2.63932100 | -1.83091200 |
| H | 1.53762600  | -5.16310300 | 4.50394700  | H | -5.26748100 | -3.56567300 | -2.27665600 |
| H | 2.84508300  | -5.46024400 | 3.34490500  | H | -5.62220100 | -1.85553900 | -1.97401200 |
| H | 1.26826000  | -6.21160500 | 3.10033400  | C | -3.62102100 | -5.15459900 | 1.40698400  |
| C | 2.17409100  | -2.88265200 | 3.12787800  | H | -4.69355000 | -4.95643800 | 1.48782600  |
| H | 1.88636900  | -1.96314200 | 2.61560600  | H | -3.28999500 | -5.53946700 | 2.37665100  |
| H | 3.23345500  | -3.07031900 | 2.93318900  | H | -3.47718500 | -5.93762500 | 0.65813200  |
| H | 2.03892100  | -2.73199700 | 4.20125600  | C | -2.21506200 | -4.97216900 | -2.82546100 |
| C | -1.67023800 | -2.27865500 | 6.55140800  | H | -2.10750200 | -4.95321600 | -3.92195900 |
| H | -2.64803100 | -2.43406000 | 6.09091000  | H | -3.27093700 | -4.78680700 | -2.62310000 |
| H | -1.63021000 | -1.25164700 | 6.92812800  | C | -1.34571700 | -4.27657400 | 0.99428200  |
| H | -1.59215100 | -2.94822400 | 7.41532700  | H | -0.71733500 | -3.41513300 | 0.76451000  |
| C | -0.55289100 | -2.56922500 | 5.55645200  | H | -1.15149900 | -5.04643300 | 0.24579900  |
| H | 0.41205300  | -2.54926200 | 6.08768200  | H | -1.04599500 | -4.66642900 | 1.97062600  |
| H | -0.66315000 | -3.58792600 | 5.18184200  | C | -1.85129900 | -6.35958100 | -2.31456100 |
| C | -0.27212600 | -0.27739000 | 4.65549000  | H | -0.80025500 | -6.60547300 | -2.49206800 |
| H | -1.17256900 | 0.20050800  | 5.07810900  | H | -2.45425900 | -7.11815700 | -2.82358600 |
| H | -0.10942600 | 0.18185600  | 3.67850600  | H | -2.03986200 | -6.44500400 | -1.24200200 |
| C | 0.90842300  | 0.01498100  | 5.57040100  | C | -3.03988200 | -2.82753300 | 2.10677700  |
| H | 0.75433800  | -0.36065700 | 6.58764100  | H | -2.57877000 | -1.87943100 | 1.81716700  |
| H | 1.05757000  | 1.09580600  | 5.64508500  | H | -2.60330500 | -3.14941300 | 3.05590900  |
| H | 1.82909700  | -0.42598800 | 5.18192300  | H | -4.10426100 | -2.64576500 | 2.28750200  |
| P | 3.01596700  | 2.12601400  | 0.69871000  | P | 1.25004600  | 2.47678000  | -2.63200900 |
| N | 1.72816300  | 1.31006700  | 0.54238200  | N | 0.08263700  | 2.86447100  | -3.75316700 |
| N | 2.91414300  | 3.32730300  | 1.90617500  | N | 2.06714700  | 3.90745300  | -2.29829200 |
| N | 3.72337800  | 2.97287900  | -0.65167200 | N | 0.66561900  | 1.56771400  | -1.47209500 |

|   |            |             |             |   |             |             |             |
|---|------------|-------------|-------------|---|-------------|-------------|-------------|
| N | 4.52868300 | 1.37873000  | 1.02554800  | N | 2.60116500  | 1.77097400  | -3.35456600 |
| C | 4.81983300 | 2.17843700  | -1.17230700 | C | -1.24113100 | 2.24874400  | -3.74916300 |
| H | 5.48687000 | 2.78253300  | -1.79548400 | H | -1.34542900 | 1.58314400  | -4.61560800 |
| H | 4.47214700 | 1.32472800  | -1.77236000 | H | -1.29422700 | 1.61709400  | -2.86294000 |
| C | 5.55239600 | 1.67138000  | 0.05403800  | C | -2.37888300 | 3.25675200  | -3.74178600 |
| H | 6.14322600 | 0.78131000  | -0.19648900 | H | -3.33305500 | 2.72707300  | -3.69706300 |
| H | 6.25740400 | 2.44128600  | 0.41579100  | H | -2.32226000 | 3.91540300  | -2.87326400 |
| C | 4.86428000 | 0.51926300  | 2.16531100  | H | -2.39590100 | 3.87755300  | -4.64251000 |
| C | 6.17507200 | 0.98622800  | 2.81152100  | C | 1.56915300  | 5.03870800  | -1.49236000 |
| H | 7.02684800 | 0.89132000  | 2.13081100  | C | 1.96495200  | 6.35023400  | -2.17363500 |
| H | 6.39329100 | 0.37882300  | 3.69571100  | H | 1.56116300  | 6.40147000  | -3.18863900 |
| H | 6.10399700 | 2.03092500  | 3.12693300  | H | 1.57163700  | 7.19963200  | -1.60858600 |
| C | 5.02709000 | -0.93016700 | 1.69725300  | H | 3.05029400  | 6.47233100  | -2.23045800 |
| H | 4.09290100 | -1.29172400 | 1.26720600  | C | 2.70176500  | 0.41487800  | -3.93829100 |
| H | 5.30322300 | -1.58060900 | 2.53433700  | C | 0.04937900  | 4.97844600  | -1.38571000 |
| H | 5.80871700 | -1.02418300 | 0.93766100  | H | -0.28779100 | 4.02945300  | -0.95918400 |
| C | 3.76296200 | 0.57371900  | 3.22045500  | H | -0.29957300 | 5.77390600  | -0.72294300 |
| H | 3.74167900 | 1.54594100  | 3.71520300  | H | -0.42637500 | 5.11454400  | -2.35784000 |
| H | 3.94639100 | -0.19554900 | 3.97599300  | C | 3.81783700  | 2.39653600  | -2.85611100 |
| H | 2.78076700 | 0.40144900  | 2.77489900  | H | 4.13607200  | 1.94854700  | -1.90740300 |
| C | 2.87442900 | 3.65790500  | -1.64498000 | H | 4.62871100  | 2.27509800  | -3.57802900 |
| C | 2.27872200 | 2.68513900  | -2.66808100 | C | 2.16132000  | 4.97786800  | -0.08381000 |
| H | 3.05311500 | 2.22564000  | -3.28900200 | H | 3.25307800  | 5.03948800  | -0.09333900 |
| H | 1.59057300 | 3.20534800  | -3.34228700 | H | 1.79392900  | 5.81117200  | 0.52208700  |
| H | 1.73127500 | 1.88989800  | -2.15748800 | H | 1.87704700  | 4.04273700  | 0.40055700  |
| C | 3.72035600 | 4.70833000  | -2.37238800 | C | 3.47212000  | 3.86439200  | -2.66600200 |
| H | 4.18701100 | 5.39008300  | -1.65523200 | H | 3.65143800  | 4.42748300  | -3.59355700 |
| H | 3.08906700 | 5.29534000  | -3.04701000 | H | 4.10015300  | 4.30099700  | -1.88509500 |
| H | 4.51047800 | 4.25871800  | -2.98089000 | C | 3.42755200  | 0.52730000  | -5.28396800 |
| C | 1.73702600 | 4.38080700  | -0.92913900 | H | 4.44456700  | 0.91409000  | -5.17756900 |
| H | 1.08151800 | 3.66776300  | -0.42715000 | H | 3.50580100  | -0.45997400 | -5.74702600 |
| H | 1.14030800 | 4.93879700  | -1.65570300 | H | 2.88252100  | 1.18345300  | -5.96715900 |
| H | 2.11845500 | 5.08417100  | -0.18697500 | C | 0.37258500  | 3.81971500  | -4.81599800 |
| C | 3.95091600 | 5.61351300  | 1.94689000  | H | -0.26661600 | 4.70510600  | -4.69764000 |
| H | 3.07636000 | 6.07218300  | 2.41853800  | H | 1.39831900  | 4.16780800  | -4.68315700 |
| H | 3.87768400 | 5.77305600  | 0.86912400  | C | 1.31725600  | -0.17093100 | -4.18803600 |
| H | 4.83687300 | 6.14664200  | 2.30930200  | H | 0.75591700  | -0.31107000 | -3.26230700 |
| C | 4.06328500 | 4.12739100  | 2.26584000  | H | 0.72827400  | 0.45915500  | -4.85744100 |
| H | 4.92908000 | 3.72033900  | 1.74162700  | H | 1.42565600  | -1.15005300 | -4.65938600 |
| H | 4.27823200 | 4.00822700  | 3.34047800  | C | 0.20569900  | 3.25337000  | -6.21738800 |
| C | 1.64199000 | 3.66145700  | 2.50633500  | H | -0.82344400 | 2.94739900  | -6.42190400 |
| H | 0.95240700 | 2.87040300  | 2.20714900  | H | 0.47300100  | 4.01208100  | -6.95829300 |
| H | 1.24323500 | 4.60115700  | 2.09065500  | H | 0.85301300  | 2.38694600  | -6.37307800 |
| C | 1.67517000 | 3.77318500  | 4.02462300  | C | 3.48353100  | -0.50551600 | -3.00259700 |
| H | 0.66502700 | 3.95606400  | 4.40492400  | H | 3.03173400  | -0.54524700 | -2.00712100 |
| H | 2.30588600 | 4.59763600  | 4.37401500  | H | 3.50103600  | -1.51838000 | -3.41076300 |
| H | 2.04227600 | 2.85122100  | 4.48146100  | H | 4.52424500  | -0.18497200 | -2.89442700 |

**Table S30.** Truncated structure used for MC-PDFT calculations

|             |          |         |          |
|-------------|----------|---------|----------|
| <b>atom</b> |          |         |          |
| P           | -2.2382  | 2.8465  | -0.87777 |
| N           | -1.49372 | 4.05639 | -1.78695 |
| N           | -3.21771 | 3.65364 | 0.25701  |
| N           | -1.22359 | 1.76694 | -0.39534 |
| N           | -3.62159 | 2.38061 | -1.78759 |
| C           | -4.76576 | 2.29298 | -0.89845 |
| H           | -4.76453 | 1.36501 | -0.30638 |

|    |          |          |          |
|----|----------|----------|----------|
| H  | -5.70323 | 2.33435  | -1.45917 |
| C  | -4.63645 | 3.49176  | 0.019    |
| H  | -5.07029 | 4.38378  | -0.46061 |
| H  | -5.1829  | 3.31957  | 0.95277  |
| P  | 2.29938  | 0.86686  | 2.7937   |
| N  | 1.58364  | 1.78167  | 4.0165   |
| N  | 3.27464  | -0.28259 | 3.58485  |
| N  | 1.26259  | 0.39815  | 1.7291   |
| N  | 3.68689  | 1.75971  | 2.31026  |
| C  | 4.81794  | 0.85578  | 2.2036   |
| H  | 4.79581  | 0.26675  | 1.27406  |
| H  | 5.76308  | 1.40413  | 2.2331   |
| C  | 4.69392  | -0.06352 | 3.40174  |
| H  | 5.1474   | 0.40818  | 4.28834  |
| H  | 5.22523  | -1.00391 | 3.21929  |
| P  | -2.32284 | -2.79475 | 0.88292  |
| N  | -1.60927 | -4.01861 | 1.79852  |
| N  | -3.3095  | -3.58326 | -0.25834 |
| N  | -1.28191 | -1.73574 | 0.40833  |
| N  | -3.70259 | -2.29889 | 1.78256  |
| C  | -4.83794 | -2.18909 | 0.88421  |
| H  | -4.81353 | -1.26211 | 0.29101  |
| H  | -5.78031 | -2.21076 | 1.43757  |
| C  | -4.72637 | -3.39119 | -0.03106 |
| H  | -5.18225 | -4.27352 | 0.44617  |
| H  | -5.2621  | -3.20883 | -0.96912 |
| P  | 2.26243  | -0.88101 | -2.82242 |
| N  | 1.52425  | -1.78069 | -4.0438  |
| N  | 3.25875  | 0.24989  | -3.61414 |
| N  | 1.23898  | -0.3958  | -1.75272 |
| N  | 3.63374  | -1.80478 | -2.34726 |
| C  | 4.78301  | -0.92394 | -2.24295 |
| H  | 4.77509  | -0.33437 | -1.31333 |
| H  | 5.71719  | -1.49072 | -2.27542 |
| C  | 4.67369  | -0.00209 | -3.44014 |
| H  | 5.11089  | -0.48421 | -4.32914 |
| H  | 5.22754  | 0.92598  | -3.26094 |
| Pr | -0.00501 | -0.00008 | -0.00215 |
| H  | -2.99192 | -3.55559 | -1.22997 |
| H  | -0.59103 | -3.9277  | 1.83411  |
| H  | -1.90497 | -4.97094 | 1.56478  |
| H  | -3.86539 | -2.84111 | 2.63571  |

|   |          |          |          |
|---|----------|----------|----------|
| H | 1.87619  | 1.53991  | 4.96779  |
| H | 0.56504  | 1.81391  | 3.92411  |
| H | 2.94871  | -1.25152 | 3.56901  |
| H | 3.8509   | 2.61061  | 2.85561  |
| H | -2.90045 | 3.55606  | 1.22335  |
| H | -3.46288 | 1.57974  | -2.40442 |
| H | -0.48983 | 4.13198  | -1.60771 |
| H | -1.96307 | 4.96577  | -1.80553 |
| H | 2.92442  | 1.21259  | -3.64797 |
| H | 3.45197  | -2.37492 | -1.51568 |
| H | 0.66018  | -2.24027 | -3.7475  |

## References

1. Gompa, T. P.; Rice, N. T.; Russo, D. R.; Quintana, L. M. A.; Yik, B. J.; Bacsa, J.; La Pierre, H. S. Diethyl Ether Adducts of Trivalent Lanthanide Iodides. *Dalton Trans.* **2019**, *48*, 8030-8033.
2. Rice, N. T.; Popov, I. A.; Russo, D. R.; Bacsa, J.; Batista, E. R.; Yang, P.; Telser, J.; La Pierre, H. S. Design, Isolation, and Spectroscopic Analysis of a Tetravalent Terbium Complex. *J. Am. Chem. Soc.* **2019**, *141* (33), 13222-13233.
3. Johnson, S. A.; Kiernicki, J. J.; Fanwick, P. E.; Bart, S. C. New Benzylpotassium Reagents and Their Utility for the Synthesis of Homoleptic Uranium(IV) Benzyl Derivatives. *Organometallics* **2015**, *34* (12), 2889-2895.
4. Fulmer, G. R.; Miller, A. J. M.; Sherden, N. H.; Gottlieb, H. E.; Nudelman, A.; Stoltz, B. M.; Bercaw, J. E.; Goldberg, K. I. NMR Chemical Shifts of Trace Impurities: Common Laboratory Solvents, Organics, and Gases in Deuterated Solvents Relevant to the Organometallic Chemist. *Organometallics* **2010**, *29* (9), 2176-2179.
5. Sheldrick, G. SHELXT - Integrated space-group and crystal-structure determination. *Acta Crystallogr. A.* **2015**, *71* (1), 3-8.
6. Dolomanov, O. V.; Bourhis, L. J.; Gildea, R. J.; Howard, J. A. K.; Puschmann, H. OLEX2: a complete structure solution, refinement and analysis program. *J. Appl. Crystallogr.* **2009**, *42* (2), 339-341.
7. Sheldrick, G. M. Crystal structure refinement with SHELXL. *Acta Crystallogr. C.* **2015**, *71* (Pt 1), 3-8.
8. Rice, N. T.; Popov, I. A.; Russo, D. R.; Gompa, T. P.; Ramanathan, A.; Bacsa, J.; Batista, E. R.; Yang, P.; La Pierre, H. S. Comparison of tetravalent cerium and terbium ions in a conserved, homoleptic imidophosphorane ligand field. *Chem. Sci.* **2020**, *11* (24), 6149-6159.
9. Stoll, S.; Schweiger, A. EasySpin, a comprehensive software package for spectral simulation and analysis in EPR. *J. Magn. Reson.* **2006**, *178* (1), 42-55.
10. Windorff, C. J.; Celis-Barros, C.; Sperling, J. M.; McKinnon, N. C.; Albrecht-Schmitt, T. E. Probing a variation of the inverse-trans-influence in americium and lanthanide tribromide tris(tricyclohexylphosphine oxide) complexes. *Chem. Sci.* **2020**, *11* (10), 2770-2782.
11. Cotton, S., *Lanthanide and Actinide Chemistry* John Wiley & Sons Ltd. : West Sussex, England 2006; p 263.
12. Ramos-Lara, F.; C, A. L.; Ramírez, M. O.; Flores, M.; Arroyo, R.; Caldiño, U. Optical spectroscopy of Nd<sup>3+</sup> ions in poly(acrylic acid). *J. Phys-Condens. Mat.* **2006**, *18* (34), 7951-7959.
13. Okasha, A.; Abdelghany, A. M.; Marzouk, S. Y. The influence of Ba<sup>2+</sup> and Sr<sup>2+</sup> ions with the Dy<sup>3+</sup> ions on the optical properties of lead borate glasses: experimental and Judd–Ofelt comparative study. *J. Mater. Res. Technol.* **2020**, *9* (1), 59-66.
14. Suthanthirakumar, P.; Marimuthu, K. Investigations on spectroscopic properties of Dy<sup>3+</sup> doped zinc telluro-fluoroborate glasses for laser and white LED applications. *J. Mol. Struct.* **2016**, *1125*, 443-452.
15. Perdew, J. P.; Ernzerhof, M.; Burke, K. Rationale for mixing exact exchange with density functional approximations. *J. Chem. Phys.* **1996**, *105* (22), 9982-9985.



16. Frisch, M. J.; Trucks, G. W.; Schlegel, H. B.; Scuseria, G. E.; Robb, M. A.; Cheeseman, J. R.; Scalmani, G.; Barone, V.; Petersson, G. A.; Nakatsuji, H.; Li, X.; Caricato, M.; Marenich, A. V.; Bloino, J.; Janesko, B. G.; Gomperts, R.; Mennucci, B.; Hratchian, H. P.; Ortiz, J. V.; Izmaylov, A. F.; Sonnenberg, J. L.; Williams; Ding, F.; Lipparini, F.; Egidi, F.; Goings, J.; Peng, B.; Petrone, A.; Henderson, T.; Ranasinghe, D.; Zakrzewski, V. G.; Gao, J.; Rega, N.; Zheng, G.; Liang, W.; Hada, M.; Ehara, M.; Toyota, K.; Fukuda, R.; Hasegawa, J.; Ishida, M.; Nakajima, T.; Honda, Y.; Kitao, O.; Nakai, H.; Vreven, T.; Throssell, K.; Montgomery Jr., J. A.; Peralta, J. E.; Ogliaro, F.; Bearpark, M. J.; Heyd, J. J.; Brothers, E. N.; Kudin, K. N.; Staroverov, V. N.; Keith, T. A.; Kobayashi, R.; Normand, J.; Raghavachari, K.; Rendell, A. P.; Burant, J. C.; Iyengar, S. S.; Tomasi, J.; Cossi, M.; Millam, J. M.; Klene, M.; Adamo, C.; Cammi, R.; Ochterski, J. W.; Martin, R. L.; Morokuma, K.; Farkas, O.; Foresman, J. B.; Fox, D. J. *Gaussian 16 Rev. B.01*, Wallingford, CT, 2016.
17. Dolg, M.; Stoll, H.; Preuss, H. Energy-adjusted ab initio pseudopotentials for the rare earth elements. *J. Chem. Phys.* **1989**, *90* (3), 1730-1734.
18. Cao, X.; Dolg, M. Valence basis sets for relativistic energy-consistent small-core lanthanide pseudopotentials. *J. Chem. Phys.* **2001**, *115* (16), 7348-7355.
19. Krishnan, R.; Binkley, J. S.; Seeger, R.; Pople, J. A. Self-consistent molecular orbital methods. XX. A basis set for correlated wave functions. *J. Chem. Phys.* **1980**, *72* (1), 650-654.
20. Martin, R. L. Natural transition orbitals. *J. Chem. Phys.* **2003**, *118* (11), 4775-4777.
21. Foster, J. P.; Weinhold, F. Natural hybrid orbitals. *J. Am. Chem. Soc.* **1980**, *102* (24), 7211-7218.
22. Weinhold, F.; Landis, C., *Valency and bonding: a natural bond orbital donor acceptor perspective* Cambridge University Press 2005.
23. <http://iqmol.org/>.
24. Lenoid, S. *Chemission v4.60*, <http://www.chemission.com>.
25. Li Manni, G.; Carlson, R. K.; Luo, S.; Ma, D.; Olsen, J.; Truhlar, D. G.; Gagliardi, L. Multiconfiguration Pair-Density Functional Theory. *J. Chem. Theory Comput.* **2014**, *10* (9), 3669-3680.
26. Gagliardi, L.; Truhlar, D. G.; Li Manni, G.; Carlson, R. K.; Hoyer, C. E.; Bao, J. L. Multiconfiguration Pair-Density Functional Theory: A New Way To Treat Strongly Correlated Systems. *Accounts Chem. Res.* **2017**, *50* (1), 66-73.
27. Fdez. Galván, I.; Vacher, M.; Alavi, A.; Angeli, C.; Aquilante, F.; Autschbach, J.; Bao, J. J.; Bokarev, S. I.; Bogdanov, N. A.; Carlson, R. K.; Chibotaru, L. F.; Creutzberg, J.; Dattani, N.; Delcey, M. G.; Dong, S. S.; Dreuw, A.; Freitag, L.; Frutos, L. M.; Gagliardi, L.; Gendron, F.; Giussani, A.; González, L.; Grell, G.; Guo, M.; Hoyer, C. E.; Johansson, M.; Keller, S.; Knecht, S.; Kovačević, G.; Källman, E.; Li Manni, G.; Lundberg, M.; Ma, Y.; Mai, S.; Malhado, J. P.; Malmqvist, P. Å.; Marquetand, P.; Mewes, S. A.; Norell, J.; Olivucci, M.; Oppel, M.; Phung, Q. M.; Pierloot, K.; Plasser, F.; Reiher, M.; Sand, A. M.; Schapiro, I.; Sharma, P.; Stein, C. J.; Sørensen, L. K.; Truhlar, D. G.; Ugandi, M.; Ungur, L.; Valentini, A.; Vancoillie, S.; Veryazov, V.; Weser, O.; Wesolowski, T. A.; Widmark, P.-O.; Wouters, S.; Zech, A.; Zobel, J. P.; Lindh, R. OpenMolcas: From Source Code to Insight. *J. Chem. Theory Comput.* **2019**, *15* (11), 5925-5964.

28. Bao, J. J.; Zhou, C.; Varga, Z.; Kanchanakungwankul, S.; Gagliardi, L.; Truhlar, D. G. Multi-state pair-density functional theory. *Faraday Discuss.* **2020**, *224* (0), 348-372.
29. Carlson, R. K.; Truhlar, D. G.; Gagliardi, L. Multiconfiguration Pair-Density Functional Theory: A Fully Translated Gradient Approximation and Its Performance for Transition Metal Dimers and the Spectroscopy of Re<sub>2</sub>Cl<sub>8</sub><sup>2-</sup>. *J. Chem. Theory Comput.* **2015**, *11* (9), 4077-4085.
30. Roos, B. O.; Lindh, R.; Malmqvist, P.-Å.; Veryazov, V.; Widmark, P.-O.; Borin, A. C. New Relativistic Atomic Natural Orbital Basis Sets for Lanthanide Atoms with Applications to the Ce Diatom and LuF<sub>3</sub>. *J. Chem. Phys. A.* **2008**, *112* (45), 11431-11435.
31. Roos, B. O.; Lindh, R.; Malmqvist, P.-Å.; Veryazov, V.; Widmark, P.-O. Main Group Atoms and Dimers Studied with a New Relativistic ANO Basis Set. *J. Phys. Chem. A.* **2004**, *108* (15), 2851-2858.
32. Widmark, P.-O.; Malmqvist, P.-Å.; Roos, B. O. Density matrix averaged atomic natural orbital (ANO) basis sets for correlated molecular wave functions. *Theor. Chim. Acta.* **1990**, *77* (5), 291-306.
33. Clark, T.; Chandrasekhar, J.; Spitznagel, G. W.; Schleyer, P. V. R. Efficient diffuse function-augmented basis sets for anion calculations. III. The 3-21+G basis set for first-row elements, Li–F. *J. Comput. Chem.* **1983**, *4* (3), 294-301.
34. Frisch, M. J.; Pople, J. A.; Binkley, J. S. Self-consistent molecular orbital methods 25. Supplementary functions for Gaussian basis sets. *J. Chem. Phys.* **1984**, *80* (7), 3265-3269.
35. Curtiss, L. A.; Raghavachari, K.; Redfern, P. C.; Rassolov, V.; Pople, J. A. Gaussian-3 (G3) theory for molecules containing first and second-row atoms. *J. Chem. Phys.* **1998**, *109* (18), 7764-7776.
36. Fast, P. L.; Sánchez, M. a. L.; Truhlar, D. G. Multi-coefficient Gaussian-3 method for calculating potential energy surfaces. *Chem. Phys. Lett.* **1999**, *306* (5), 407-410.
37. M. Tratz, C.; L. Fast, P.; G. Truhlar, D. Improved coefficients for the scaling all correlation and multi-coefficient correlation methods. *Phys. Chem. Comm.* **1999**, *2* (14), 70-79.
38. Reiher, M. Douglas–Kroll–Hess Theory: a relativistic electrons-only theory for chemistry. *Theor. Chem. Acc.* **2006**, *116* (1), 241-252.
39. Tishchenko, O.; Zheng, J.; Truhlar, D. G. Multireference Model Chemistries for Thermochemical Kinetics. *J. Chem. Theory Comput.* **2008**, *4* (8), 1208-1219.
